# Supplementary material for: Rh(ii)-Catalyzed denitrogenative 1-sulfonyl-1,2,3-triazole-1-alkyl-1,2,3-triazole cross-coupling as a route to 3-sulfonamido-1H-pyrroles and 1,2,3-triazol-3-ium ylides
Source: Royal Society of Chemistry journal article supplement (doi:10.1039/d0qo01571g), 2021-01-01
Supplement: d0qo01571g1.pdf [file d0qo01571g1.pdf]

## Supplementary Information

### Rh(II)-catalyzed denitrogenative 1-sulfonyl-1,2,3-triazole– 1-alkyl-1,2,3-triazole cross-coupling as a route to 3-sulfamido-1*H*-pyrroles and 1,2,3-triazol-3-ium ylides

Alexander N. Koronotov, Kseniia K. Afanaseva, Pavel A. Sakharov, Nikolai V. Rostovskii,  
Alexander F. Khlebnikov and Mikhail S. Novikov\*

St. Petersburg State University, Institute of Chemistry, 7/9 Universitetskaya nab.,  
St. Petersburg, 199034, Russia.

E-mail: m.novikov@spbu.ru

#### Table of Contents

|                                                        |     |
|--------------------------------------------------------|-----|
| 1. General experimental details.....                   | S2  |
| 2. Synthesis of triazole <b>2k</b> .....               | S2  |
| 3. Synthesis of pyrroles <b>3</b> .....                | S3  |
| 4. Synthesis of triazolium ylides <b>20</b> .....      | S13 |
| 5. <sup>1</sup> H and <sup>13</sup> C NMR spectra..... | S17 |
| 6. X-ray data of compound <b>3b</b> .....              | S53 |
| 7. Calculation details.....                            | S59 |
| 8. References.....                                     | S78 |

## 1. General experimental details

Melting points were determined on a hot stage microscope and are uncorrected.  $^1\text{H}$  (400 MHz) and  $^{13}\text{C}$  (100 MHz) NMR spectra were recorded on a Bruker AVANCE 400 spectrometer in solvent indicated below. Chemical shifts ( $\delta$ ) are reported in ppm downfield from tetramethylsilane. Crystallographic data for compound **3b** (CCDC 2044431) have been deposited with the Cambridge Crystallographic Data Centre. Column chromatography was performed on silica gel 60 M (0.04–0.063 mm). Thin-layer chromatography (TLC) was conducted on aluminum sheets precoated with  $\text{SiO}_2$  ALUGRAM SIL G/UV254. All solvents were distilled and dried prior to use. 1,2-Dichloroethane (DCE) and dichloromethane (DCM) were washed with concentrated  $\text{H}_2\text{SO}_4$ , water, then distilled from  $\text{P}_2\text{O}_5$  and stored over anhydrous  $\text{K}_2\text{CO}_3$ .

Triazoles **1a–h**<sup>1</sup> and triazoles **2a–j, l–p**<sup>2</sup> were synthesized according to the published procedures and they have full characterization data.

## 2. Synthesis of triazole **2k**

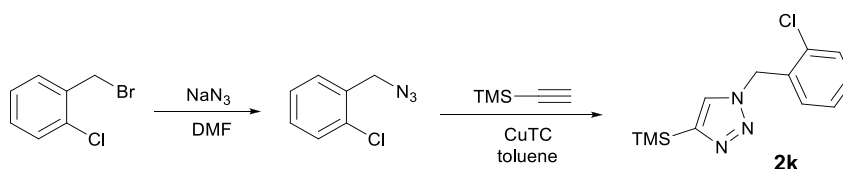

To a solution of sodium azide (650 mg, 10 mmol) in DMF (20 mL) 1-(bromomethyl)-2-chlorobenzene (2.05 g, 10 mmol) was added dropwise at 5–10 °C. The resulting reaction mixture was stirred overnight, followed by the addition of cold water (40 mL) and toluene (25 mL). The water phase was extracted once with toluene (25 mL), and the combined organic phases were washed with water, brine and dried over anhydrous  $\text{Na}_2\text{SO}_4$  at 3–5 °C. A cold toluene solution of azide was filtered, the insoluble material was washed with toluene (10 mL). To the combined cold phases ethynyltrimethylsilane (980 mg, 10 mmol) and copper thiophene-2-carboxylate (CuTC) (191 mg, 1 mmol) were added, and the resulting mixture was stirred overnight at room temperature. The reaction mixture was filtered through the pad of celite using DCM as eluent. The residue obtained after evaporation of the solvent was crystallized from  $\text{Et}_2\text{O}$ /hexane mixture (1:1, 2 mL) to give 0.929 g (35%) of 1-(2-chlorobenzyl)-4-(trimethylsilyl)-1H-1,2,3-triazole **2k** as a white solid. M.p. 74–76 °C ( $\text{Et}_2\text{O}$ /hexane).  $^1\text{H}$  NMR (400 MHz,  $\text{CDCl}_3$ )  $\delta$  7.55 (s, 1H), 7.45–7.43 (m, 1H), 7.33–7.25 (m, 2H), 7.16–7.14 (m, 1H), 5.71 (s, 2H), 0.33 (s, 9H).  $^{13}\text{C}$  NMR (100 MHz,  $\text{CDCl}_3$ )  $\delta$  133.3, 132.9, 130.2, 130.0, 129.8, 129.3 (br), 127.6, 50.7, -1.1. HRMS–ESI:  $[\text{M} + \text{H}]^+$  calcd for  $\text{C}_{12}\text{H}_{17}^{35}\text{ClN}_3\text{Si}^+$  266.0875, found 266.0881.

### 3. Synthesis of pyrroles 3

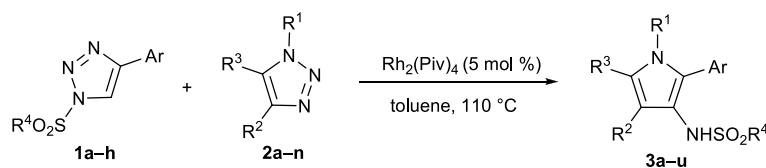

*General procedure:* A screw-cap tube was charged with 1-sulfonyl-1*H*-1,2,3-triazole **1a-h** (0.54 mmol), 1-alkyl-4-aryl-1*H*-1,2,3-triazole **2a-n** (0.3 mmol), and toluene (0.6 mL). To the mixture heated to 110 °C  $\text{Rh}_2(\text{Piv})_4$  (9.1 mg, 0.015 mmol) was added, and the cap was immediately screwed. The reaction mixture was heated at this temperature under stirring until full consumption of the starting materials (~15 min, control by TLC). The solvent was removed under reduced pressure, and the product was purified by column chromatography on silica gel.

#### 4-Methyl-*N*-(1-methyl-2,4-diphenyl-1*H*-pyrrol-3-yl)benzenesulfonamide (**3a**)

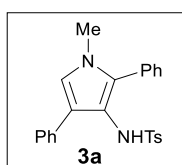

Compound **3a** was prepared according to the general procedure from 4-phenyl-1-tosyl-1*H*-1,2,3-triazole **1a** (162 mg, 0.54 mmol) and 1-methyl-4-phenyl-1*H*-1,2,3-triazole **2a** (48 mg, 0.3 mmol) using benzene/EtOAc mixture (50:1) as eluent for chromatography. White solid (110 mg, yield 91%). M.p. 131–132 °C ( $\text{CHCl}_3$ ).  $^1\text{H}$  NMR (400 MHz,  $\text{CDCl}_3$ )  $\delta$  7.40–7.36 (m, 2H), 7.36–7.30 (m, 3H), 7.27–7.15 (m, 7H), 6.85–6.80 (m, 2H), 6.70 (s, 1H), 6.45 (s, 1H), 3.48 (s, 3H), 2.31 (s, 3H).  $^{13}\text{C}$  NMR (100 MHz,  $\text{CDCl}_3$ )  $\delta$  142.3, 136.7, 134.2, 132.9, 130.2, 130.2, 128.8, 128.2, 128.1, 127.6, 127.4, 127.0, 125.6, 122.5, 119.4, 113.6, 35.2, 21.4. HRMS–ESI:  $[\text{M} + \text{Na}]^+$  calcd for  $\text{C}_{24}\text{H}_{22}\text{N}_2\text{NaO}_2\text{S}^+$  425.1294, found 425.1286.

#### *N*-(4-(4-Chlorophenyl)-1-methyl-2-phenyl-1*H*-pyrrol-3-yl)-4-methylbenzenesulfonamide (**3b**)

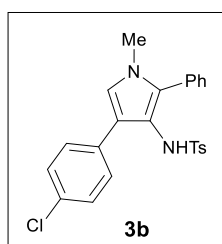

Compound **3b** was prepared according to the general procedure from 4-phenyl-1-tosyl-1*H*-1,2,3-triazole **1a** (162 mg, 0.54 mmol) and 4-(4-chlorophenyl)-1-methyl-1*H*-1,2,3-triazole **2b** (58 mg, 0.3 mmol) using benzene/EtOAc mixture (50:1) as eluent for chromatography. White solid (84 mg, yield 64%). Mp: 193–194 °C (CHCl<sub>3</sub>). <sup>1</sup>H NMR (400 MHz, CDCl<sub>3</sub>) δ 7.35–7.34 (m, 3H), 7.31–7.29 (m, 2H), 7.26–7.24 (m, 2H), 7.22–7.19 (m, 2H), 7.18–7.16 (m, 2H), 6.87–6.85 (m, 2H), 6.69 (s, 1H), 6.40 (s, 1H), 3.48 (s, 3H), 2.35 (s, 3H). <sup>13</sup>C NMR (100 MHz, CDCl<sub>3</sub>) δ 142.7, 136.8, 133.3, 132.8, 131.4, 130.1, 129.9, 128.8, 128.6, 128.3, 128.2, 127.7, 127.0, 121.3, 119.4, 113.5, 35.2, 21.4. HRMS–ESI: [M + Na]<sup>+</sup> calcd for C<sub>24</sub>H<sub>21</sub><sup>35</sup>ClN<sub>2</sub>NaO<sub>2</sub>S<sup>+</sup> 459.0904, found 459.0896.

***N*-(4-(4-Bromophenyl)-1-methyl-2-phenyl-1*H*-pyrrol-3-yl)-4-methylbenzenesulfonamide (3c)**

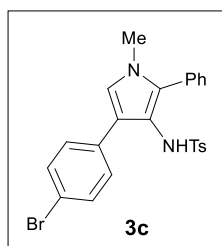

Compound **3c** was prepared according to the general procedure from 4-phenyl-1-tosyl-1*H*-1,2,3-triazole **1a** (162 mg, 0.54 mmol) and 4-(4-bromophenyl)-1-methyl-1*H*-1,2,3-triazole **2c** (71 mg, 0.3 mmol) using benzene/EtOAc mixture (50:1) as eluent for chromatography. White solid (76 mg, yield 53%). M.p. 196–197 °C (CHCl<sub>3</sub>). <sup>1</sup>H NMR (400 MHz, CDCl<sub>3</sub>) δ 7.36–7.34 (m, 3H), 7.32–7.30 (m, 2H), 7.25–7.20 (m, 6H), 6.89–6.87 (m, 2H), 6.70 (s, 1H), 6.18 (s, 1H), 3.49 (s, 3H), 2.36 (s, 3H). <sup>13</sup>C NMR (100 MHz, CDCl<sub>3</sub>) δ 142.8, 136.8, 133.34, 133.25, 131.1, 130.2, 129.9, 128.91, 128.86, 128.3, 127.8, 127.0, 121.3, 119.6, 119.3, 113.5, 35.2, 21.5. HRMS–ESI: [M + Na]<sup>+</sup> calcd for C<sub>24</sub>H<sub>21</sub><sup>79</sup>BrN<sub>2</sub>NaO<sub>2</sub>S<sup>+</sup> 503.0399, found 503.0399.

**4-Methyl-*N*-(1-methyl-2-phenyl-4-(*p*-tolyl)-1*H*-pyrrol-3-yl)benzenesulfonamide (3d)**

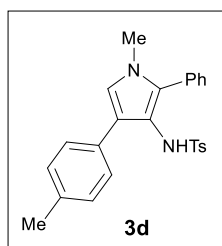

Compound **3d** was prepared according to the general procedure from 4-phenyl-1-tosyl-1*H*-1,2,3-triazole **1a** (162 mg, 0.54 mmol) and 1-methyl-4-(*p*-tolyl)-1*H*-1,2,3-triazole **1d** (52 mg, 0.3

mmol) using benzene/EtOAc mixture (50:1) as eluent for chromatography. White solid (54 mg, yield 43%). M.p. 185–186 °C (CHCl<sub>3</sub>). <sup>1</sup>H NMR (400 MHz, CDCl<sub>3</sub>) δ 7.34–7.32 (m, 3H), 7.27–7.23 (m, 4H), 7.22–7.20 (m, 2H), 7.07–7.05 (m, 2H), 6.84–6.82 (m, 2H), 6.68 (s, 1H), 6.31 (s, 1H), 3.48 (s, 3H), 2.37 (s, 3H), 2.32 (s, 3H). <sup>13</sup>C NMR (100 MHz, CDCl<sub>3</sub>) δ 142.3, 136.9, 135.2, 132.8, 131.2, 130.3, 130.2, 128.9, 128.7, 128.2, 127.5, 127.3, 127.0, 122.5, 119.1, 113.6, 35.2, 21.4, 21.1. HRMS–ESI: [M + H]<sup>+</sup> calcd for C<sub>25</sub>H<sub>25</sub>N<sub>2</sub>O<sub>2</sub>S<sup>+</sup> 417.1631, found 417.1616.

***N*-(4-(4-(*tert*-Butyl)phenyl)-1-methyl-2-phenyl-1*H*-pyrrol-3-yl)-4-methylbenzenesulfonamide (3e)**

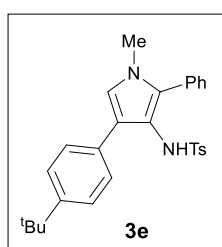

Compound **3e** was prepared according to the general procedure from 4-phenyl-1-tosyl-1*H*-1,2,3-triazole **1a** (162 mg, 0.54 mmol) and 4-(4-(*tert*-butyl)phenyl)-1-methyl-1*H*-1,2,3-triazole **2e** (65 mg, 0.3 mmol) using benzene/EtOAc mixture (50:1) as eluent for chromatography. White solid (70 mg, yield 51%). M.p. 223–225 °C (CHCl<sub>3</sub>). <sup>1</sup>H NMR (400 MHz, CDCl<sub>3</sub>) δ 7.36–7.32 (m, 3H), 7.26–7.21 (m, 8H), 6.85–6.80 (m, 2H), 6.65 (s, 1H), 6.09 (s, 1H), 3.50 (s, 3H), 2.31 (s, 3H), 1.36 (s, 9H). <sup>13</sup>C NMR (100 MHz, CDCl<sub>3</sub>) δ 148.5, 142.2, 136.6, 132.8, 131.1, 130.4, 130.2, 128.7, 128.2, 127.5, 127.1, 127.0, 125.0, 122.4, 119.2, 113.5, 35.2, 34.3, 31.4, 21.4. HRMS–ESI: [M + Na]<sup>+</sup> calcd for C<sub>28</sub>H<sub>30</sub>N<sub>2</sub>NaO<sub>2</sub>S<sup>+</sup> 481.1920, found 481.1912.

***N*-(1-Ethyl-2,4-diphenyl-1*H*-pyrrol-3-yl)-4-methylbenzenesulfonamide (3f)**

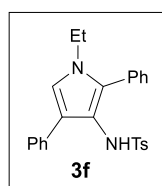

Compound **3f** was prepared according to the general procedure from 4-phenyl-1-tosyl-1*H*-1,2,3-triazole **1a** (162 mg, 0.54 mmol) and 1-ethyl-4-phenyl-1*H*-1,2,3-triazole **2f** (52 mg, 0.3 mmol) using benzene/EtOAc mixture (50:1) as eluent for chromatography. White solid (75 mg, yield 60%). M.p. 153–154 °C (CHCl<sub>3</sub>). <sup>1</sup>H NMR (400 MHz, CDCl<sub>3</sub>) δ 7.40–7.38 (m, 2H), 7.33–7.32 (m, 3H), 7.26–7.22 (m, 4H), 7.20–7.17 (m, 3H), 6.85–6.83 (m, 2H), 6.77 (s, 1H), 6.26 (s, 1H), 3.81 (q, 2H, *J* 7.2 Hz), 2.31 (s, 3H), 1.24 (t, 3H, *J* 7.2 Hz). <sup>13</sup>C NMR (100 MHz, CDCl<sub>3</sub>) δ 142.3,

136.7, 134.4, 132.4, 130.4, 130.2, 128.8, 128.2, 128.1, 127.6, 127.3, 127.0, 125.6, 122.6, 117.2, 113.5, 42.3, 21.4, 16.4. HRMS–ESI:  $[M + Na]^+$  calcd for  $C_{25}H_{24}N_2NaO_2S^+$  439.1456, found 439.1448.

#### ***N*-(1-Benzyl-2,4-diphenyl-1*H*-pyrrol-3-yl)-4-methylbenzenesulfonamide (3g)**

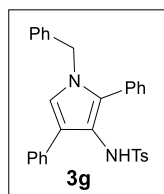

Compound **3g** was prepared according to the general procedure from 4-phenyl-1-tosyl-1*H*-1,2,3-triazole **1a** (162 mg, 0.54 mmol) and 1-benzyl-4-phenyl-1*H*-1,2,3-triazole **2g** (71 mg, 0.3 mmol) using benzene/EtOAc mixture (50:1) as eluent for chromatography. White solid (83 mg, yield 58%). M.p. 194–195 °C ( $CHCl_3$ ).  $^1H$  NMR (400 MHz,  $CDCl_3$ )  $\delta$  7.42–7.40 (m, 2H), 7.31–7.24 (m, 10H), 7.20–7.16 (m, 1H), 7.09–7.08 (m, 2H), 7.00–6.96 (m, 2H), 6.86–6.84 (m, 2H), 6.75 (s, 1H), 6.31 (s, 1H), 4.95 (s, 2H), 2.31 (s, 3H).  $^{13}C$  NMR (100 MHz,  $CDCl_3$ )  $\delta$  142.5, 137.7, 136.4, 134.1, 133.0, 130.2, 130.0, 128.8, 128.6, 128.3, 128.1, 127.8, 127.6, 127.4, 127.1, 126.7, 125.8, 123.0, 118.7, 114.0, 51.1, 21.4; HRMS–ESI:  $[M + Na]^+$  calcd for  $C_{30}H_{26}N_2NaO_2S^+$  501.1613, found 501.1598.

#### **4-Methyl-*N*-(1-(4-methylbenzyl)-2,4-diphenyl-1*H*-pyrrol-3-yl)benzenesulfonamide (3h)**

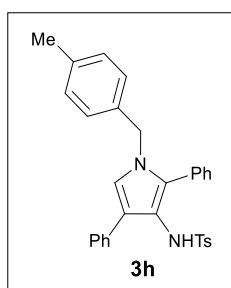

Compound **3h** was prepared according to the general procedure from 4-phenyl-1-tosyl-1*H*-1,2,3-triazole **1a** (162 mg, 0.54 mmol) and 1-(4-methylbenzyl)-4-phenyl-1*H*-1,2,3-triazole **2h** (75 mg, 0.3 mmol) using benzene/EtOAc mixture (50:1) as eluent for chromatography. White solid (86 mg, yield 58%). M.p. 186–187 °C ( $CHCl_3$ ).  $^1H$  NMR (400 MHz,  $CDCl_3$ )  $\delta$  7.39–7.37 (m, 2H), 7.30–7.23 (m, 7H), 7.18–7.15 (m, 1H), 7.12–7.09 (m, 4H), 6.88–6.83 (m, 4H), 6.72 (s, 1H), 6.23 (s, 1H), 4.90 (s, 2H), 2.35 (s, 3H), 2.31 (s, 3H).  $^{13}C$  NMR (100 MHz,  $CDCl_3$ )  $\delta$  142.4, 137.3, 136.4, 134.7, 134.2, 133.0, 130.3, 130.1, 129.3, 128.8, 128.2, 128.1, 127.7, 127.4, 127.1, 126.7,

125.7, 122.9, 118.6, 113.8, 50.9, 21.4, 21.0. HRMS–ESI:  $[M + Na]^+$  calcd for  $C_{31}H_{28}N_2NaO_2S^+$  515.1769, found 515.1786.

#### 4-Methyl-*N*-(1-(4-nitrobenzyl)-2,4-diphenyl-1*H*-pyrrol-3-yl)benzenesulfonamide (**3i**)

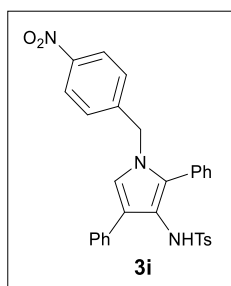

Compound **3i** was prepared according to the general procedure from 4-phenyl-1-tosyl-1*H*-1,2,3-triazole **1a** (162 mg, 0.54 mmol) and 1-(4-nitrobenzyl)-4-phenyl-1*H*-1,2,3-triazole **2i** (84 mg, 0.3 mmol) using benzene/EtOAc mixture (50:1) as eluent for chromatography. Yellow solid (89 mg, yield 57%). M.p. 207–209 °C ( $CHCl_3$ ).  $^1H$  NMR (400 MHz,  $CDCl_3$ )  $\delta$  8.14–8.12 (m, 2H), 7.37–7.35 (m, 2H), 7.30–7.17 (m, 8H), 7.07–7.03 (m, 4H), 6.87–6.85 (m, 2H), 6.76 (s, 1H), 6.13 (s, 1H), 5.06 (s, 2H), 2.31 (s, 3H).  $^{13}C$  NMR (100 MHz,  $CDCl_3$ )  $\delta$  147.4, 145.1, 142.6, 136.5, 133.7, 133.2, 130.2, 129.6, 128.9, 128.4, 128.2, 128.1, 127.4, 127.2, 127.1, 126.1, 123.9, 123.8, 118.6, 114.8, 50.7, 21.4. HRMS–ESI:  $[M + Na]^+$  calcd for  $C_{30}H_{25}N_3NaO_4S^+$  546.1463, found 546.1476.

#### *N*-(1-(2-Bromobenzyl)-2,4-diphenyl-1*H*-pyrrol-3-yl)-4-methylbenzenesulfonamide (**3j**)

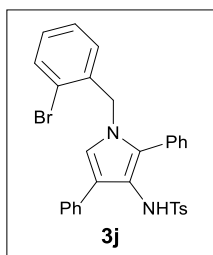

Compound **3j** was prepared according to the general procedure from 4-phenyl-1-tosyl-1*H*-1,2,3-triazole **1a** (162 mg, 0.54 mmol) and 1-(2-bromobenzyl)-4-phenyl-1*H*-1,2,3-triazole **2j** (94 mg, 0.3 mmol) using benzene/EtOAc mixture (50:1) as eluent for chromatography. White solid (92 mg, yield 55%). M.p. 195–196 °C ( $CHCl_3$ ).  $^1H$  NMR (400 MHz,  $CDCl_3$ )  $\delta$  7.54–7.51 (m, 1H), 7.42–7.39 (m, 2H), 7.30–7.23 (m, 8H), 7.20–7.14 (m, 2H), 7.06–7.04 (m, 2H), 6.86–6.84 (m, 2H), 6.73 (s, 1H), 6.71–6.69 (m, 1H), 6.17 (s, 1H), 5.01 (s, 2H), 2.31 (s, 3H).  $^{13}C$  NMR (100 MHz,  $CDCl_3$ )  $\delta$  142.5, 137.2, 136.4, 134.0, 133.1, 132.7, 130.0, 129.7, 129.1, 128.8, 128.3, 128.2, 128.1, 127.9, 127.8, 127.4, 127.1, 125.9, 123.3, 122.0, 118.7, 114.2, 51.4, 21.4. HRMS–ESI:  $[M + Na]^+$  calcd for  $C_{30}H_{25}^{79}BrN_2NaO_2S^+$  579.0718, found 579.0703.

***N*-(1-(2-Chlorobenzyl)-2-phenyl-4-(trimethylsilyl)-1*H*-pyrrol-3-yl)-4-methylbenzenesulfonamide (3k)**

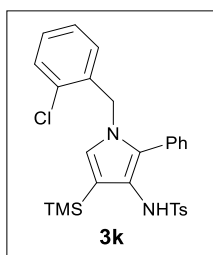

Compound **3k** was prepared according to the general procedure from 4-phenyl-1-tosyl-1*H*-1,2,3-triazole **1a** (162 mg, 0.54 mmol) and 1-(2-chlorobenzyl)-4-(trimethylsilyl)-1*H*-1,2,3-triazole **2k** (80 mg, 0.3 mmol) and using benzene/EtOAc mixture (50:1) as eluent for chromatography. White solid (102 mg, yield 67%). M.p. 146–147 °C (CHCl<sub>3</sub>). <sup>1</sup>H NMR (400 MHz, CDCl<sub>3</sub>) δ 7.32–7.30 (m, 1H), 7.24–7.19 (m, 4H), 7.18–7.14 (m, 1H), 7.07–7.03 (m, 2H), 6.91–6.89 (m, 2H), 6.65 (s, 1H), 6.59–6.57 (m, 2H), 6.51–6.49 (m, 1H), 6.10 (s, 1H), 4.92 (s, 2H), 2.32 (s, 3H), 0.40 (s, 9H). <sup>13</sup>C NMR (100 MHz, CDCl<sub>3</sub>) δ 142.4, 136.3, 135.9, 131.9, 131.8, 129.6, 129.4, 129.3, 128.9, 128.6, 128.2, 127.7, 127.4, 127.2, 127.1, 127.0, 121.2, 118.1, 48.7, 21.4, 0.4. HRMS–ESI: [M + Na]<sup>+</sup> calcd for C<sub>27</sub>H<sub>29</sub><sup>35</sup>ClN<sub>2</sub>NaO<sub>2</sub>SSi<sup>+</sup> 531.1305, found 531.1307.

***N*-(1-Isopropyl-2,4-diphenyl-1*H*-pyrrol-3-yl)-4-methylbenzenesulfonamide (3l)**

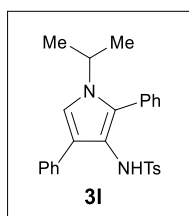

Compound **3l** was prepared according to the general procedure from 4-phenyl-1-tosyl-1*H*-1,2,3-triazole **1a** (162 mg, 0.54 mmol) and 1-isopropyl-4-phenyl-1*H*-1,2,3-triazole **2l** (56 mg, 0.3 mmol) using benzene/EtOAc mixture (50:1) as eluent for chromatography. White solid (44 mg, yield 34%). M.p. 169–171 °C (CHCl<sub>3</sub>). <sup>1</sup>H NMR (400 MHz, CDCl<sub>3</sub>) δ 7.42–7.40 (m, 2H), 7.34–7.32 (m, 3H), 7.26–7.21 (m, 4H), 7.18–7.13 (m, 3H), 6.85–6.84 (m, 3H), 6.19 (s, 1H), 4.21 (sept, 1H, *J* 6.7 Hz), 2.32 (s, 3H), 1.35 (d, 6H, *J* 6.7 Hz). <sup>13</sup>C NMR (100 MHz, CDCl<sub>3</sub>) δ 142.3, 136.7, 134.6, 132.3, 130.5, 130.4, 128.8, 128.3, 128.1, 127.6, 127.2, 127.0, 125.5, 122.6, 113.6, 113.1, 47.7, 23.7, 21.4. HRMS–ESI: [M + Na]<sup>+</sup> calcd for C<sub>26</sub>H<sub>26</sub>N<sub>2</sub>NaO<sub>2</sub>S<sup>+</sup> 453.1613, found 453.1611.



### Ethyl 3-((4-methylphenyl)sulfonamido)-2,4-diphenyl-1H-pyrrol-1-yl)propanoate (**3m**)

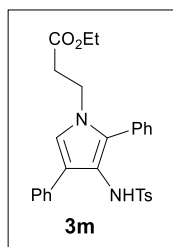

Compound **3m** was prepared according to the general procedure from 4-phenyl-1-tosyl-1*H*-1,2,3-triazole **1a** (162 mg, 0.54 mmol) and ethyl 3-(4-phenyl-1*H*-1,2,3-triazol-1-yl)propanoate **2m** (74 mg, 0.3 mmol) using benzene/EtOAc mixture (50:1) as eluent for chromatography. White solid (73 mg, yield 50%). M.p. 123–125 °C (CHCl<sub>3</sub>). <sup>1</sup>H NMR (400 MHz, CDCl<sub>3</sub>) δ 7.35–7.32 (m, 5H), 7.25–7.15 (m, 7H), 6.85–6.83 (m, 2H), 6.76 (s, 1H), 6.06 (s, 1H), 4.09 (m, 4H), 2.51 (t, 2H, *J* 7.1 Hz), 2.31 (s, 3H), 1.21 (t, 3H, *J* 7.1 Hz). <sup>13</sup>C NMR (100 MHz, CDCl<sub>3</sub>) δ 170.7, 142.4, 136.6, 134.1, 132.4, 130.2, 130.0, 128.8, 128.4, 128.1, 127.9, 127.3, 127.0, 125.7, 122.8, 118.2, 114.1, 60.8, 43.1, 35.8, 21.4, 14.1. HRMS–ESI: [M + Na]<sup>+</sup> calcd for C<sub>28</sub>H<sub>28</sub>N<sub>2</sub>NaO<sub>4</sub>S<sup>+</sup> 511.1667, found 511.1666.

### *N*-(1-Benzyl-2,4,5-triphenyl-1*H*-pyrrol-3-yl)-4-methylbenzenesulfonamide (**3n**)

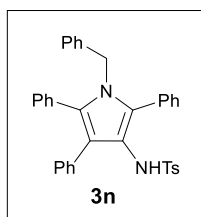

Compound **3n** was prepared according to the general procedure from 4-phenyl-1-tosyl-1*H*-1,2,3-triazole **1a** (162 mg, 0.54 mmol) and 1-benzyl-4,5-diphenyl-1*H*-1,2,3-triazole **2n** (93 mg, 0.3 mmol) using benzene/EtOAc mixture (50:1) as eluent for chromatography. Pale yellow oil (67 mg, yield 40%). <sup>1</sup>H NMR (400 MHz, CDCl<sub>3</sub>) δ 7.28–7.25 (m, 3H), 7.20–7.18 (m, 7H), 7.14–7.12 (m, 3H), 7.09–7.06 (m, 5H), 6.95–6.92 (m, 2H), 6.86–6.84 (m, 2H), 6.60–6.57 (m, 2H), 6.15 (s, 1H), 4.98 (s, 2H), 2.30 (s, 3H). <sup>13</sup>C NMR (100 MHz, CDCl<sub>3</sub>) δ 142.3, 138.6, 136.5, 133.7, 132.7, 132.0, 131.14, 131.06, 130.7, 130.5, 129.8, 128.8, 128.2 (2C), 128.1, 127.7, 127.7, 127.4, 127.0, 126.9, 126.0, 125.5, 121.8, 115.2, 48.6, 21.4. HRMS–ESI: [M + Na]<sup>+</sup> calcd for C<sub>36</sub>H<sub>30</sub>N<sub>2</sub>NaO<sub>2</sub>S<sup>+</sup> 577.1926, found 577.1928.

### ***N*-(1-Methyl-2,4-diphenyl-1*H*-pyrrol-3-yl)methanesulfonamide (3o)**

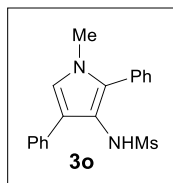

Compound **3o** was prepared according to the general procedure from 1-(methylsulfonyl)-4-phenyl-1*H*-1,2,3-triazole **1b** (120 mg, 0.54 mmol) and 1-methyl-4-phenyl-1*H*-1,2,3-triazole **2a** (48 mg, 0.3 mmol) using benzene/EtOAc mixture (50:1) as eluent for chromatography. White solid (39 mg, yield 42%). M.p. 144–146 °C (CHCl<sub>3</sub>). <sup>1</sup>H NMR (400 MHz, CDCl<sub>3</sub>) δ 7.60–7.57 (m, 2H), 7.50–7.48 (m, 4H), 7.45–7.40 (m, 3H), 7.31–7.27 (m, 1H), 6.81 (s, 1H), 5.93 (s, 1H), 3.59 (s, 3H), 2.28 (s, 3H). <sup>13</sup>C NMR (100 MHz, CDCl<sub>3</sub>) δ 134.1, 132.9, 130.5, 130.3, 128.7 (2C), 128.3, 127.9, 126.4, 122.6, 119.4, 113.8, 40.6, 35.3. HRMS–ESI: [M + Na]<sup>+</sup> calcd for C<sub>18</sub>H<sub>18</sub>N<sub>2</sub>NaO<sub>2</sub>S<sup>+</sup> 349.0987, found 349.0977.

### ***N*-(1-Methyl-2,4-diphenyl-1*H*-pyrrol-3-yl)benzenesulfonamide (3p)**

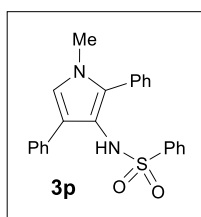

Compound **3p** was prepared according to the general procedure from 4-phenyl-1-(phenylsulfonyl)-1*H*-1,2,3-triazole **1c** (154 mg, 0.54 mmol) and 1-methyl-4-phenyl-1*H*-1,2,3-triazole **2a** (48 mg, 0.3 mmol) using benzene/EtOAc mixture (50:1) as eluent for chromatography. White solid (55 mg, yield 47%). M.p. 188–189 °C (CHCl<sub>3</sub>). <sup>1</sup>H NMR (400 MHz, CDCl<sub>3</sub>) δ 7.36–7.17 (m, 13H), 7.09–7.05 (m, 2H), 6.71 (s, 1H), 6.29 (s, 1H), 3.49 (s, 3H). <sup>13</sup>C NMR (100 MHz, CDCl<sub>3</sub>) δ 139.8, 134.1, 132.8, 131.9, 130.2, 130.1, 128.4, 128.3, 128.2, 127.7, 127.4, 127.0, 125.9, 122.5, 119.4, 113.5, 35.2. HRMS–ESI: [M + Na]<sup>+</sup> calcd for C<sub>23</sub>H<sub>20</sub>N<sub>2</sub>NaO<sub>2</sub>S<sup>+</sup> 411.1143, found 411.1136.

### ***N*-(1-Methyl-2,4-diphenyl-1*H*-pyrrol-3-yl)-4-nitrobenzenesulfonamide (3q)**

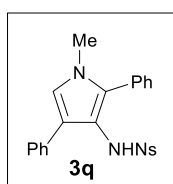

Compound **3q** was prepared according to the general procedure from 1-((4-nitrophenyl)sulfonyl)-4-phenyl-1*H*-1,2,3-triazole **1d** (178 mg, 0.54 mmol) and 1-methyl-4-phenyl-1*H*-1,2,3-triazole **2a** (48 mg, 0.3 mmol) using benzene/EtOAc mixture (50:1) as eluent for chromatography. White solid (74 mg, yield 57%). M.p. 208–210 °C (CHCl<sub>3</sub>). <sup>1</sup>H NMR (400 MHz, CDCl<sub>3</sub>) δ 7.84–7.82 (m, 2H), 7.52–7.50 (m, 2H), 7.38–7.36 (m, 3H), 7.28–7.13 (m, 7H), 6.70 (s, 1H), 6.29 (s, 1H), 3.53 (s, 3H). <sup>13</sup>C NMR (100 MHz, CDCl<sub>3</sub>) δ 149.5, 145.4, 133.9, 133.6, 130.2, 130.0, 128.5, 128.4, 128.2, 128.1, 127.4, 126.1, 123.3, 122.6, 119.7, 112.4, 35.3. HRMS–ESI: [M + H]<sup>+</sup> calcd for C<sub>23</sub>H<sub>20</sub>N<sub>3</sub>O<sub>4</sub>S<sup>+</sup> 434.1169, found 434.1156.

#### 4-Methoxy-*N*-(1-methyl-2,4-diphenyl-1*H*-pyrrol-3-yl)benzenesulfonamide (**3r**)

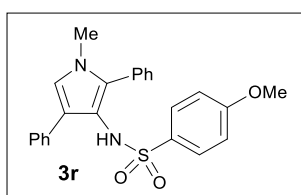

Compound **3r** was prepared according to the general procedure from 1-((4-methoxyphenyl)sulfonyl)-4-phenyl-1*H*-1,2,3-triazole **1e** (170 mg, 0.54 mmol) and 1-methyl-4-phenyl-1*H*-1,2,3-triazole **2a** (48 mg, 0.3 mmol) using benzene/EtOAc mixture (50:1) as eluent for chromatography. White solid (30 mg, yield 24%). M.p. 180–181 °C (CHCl<sub>3</sub>). <sup>1</sup>H NMR (400 MHz, CDCl<sub>3</sub>) δ 7.40–7.31 (m, 5H), 7.28–7.23 (m, 6H), 7.18–7.14 (m, 1H), 6.70 (s, 1H), 6.52–6.49 (m, 2H), 6.14 (s, 1H), 3.80 (s, 3H), 3.50 (s, 3H). <sup>13</sup>C NMR (100 MHz, CDCl<sub>3</sub>) δ 162.3, 134.2, 132.9, 131.3, 130.3, 130.2, 129.1, 128.3, 128.2, 127.7, 127.4, 125.8, 122.5, 119.4, 113.7, 113.4, 55.3, 35.2. HRMS–ESI: [M + Na]<sup>+</sup> calcd for C<sub>24</sub>H<sub>22</sub>N<sub>2</sub>NaO<sub>3</sub>S<sup>+</sup> 441.1243, found 441.1227.

#### *N*-(2-(4-(*tert*-Butyl)phenyl)-1-methyl-4-phenyl-1*H*-pyrrol-3-yl)-4-methylbenzenesulfonamide (**3s**)

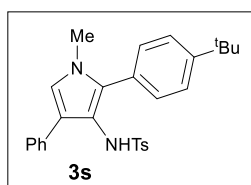

Compound **3s** was prepared according to the general procedure from 4-(4-(*tert*-butyl)phenyl)-1-tosyl-1*H*-1,2,3-triazole **1f** (192 mg, 0.54 mmol) and 1-methyl-4-phenyl-1*H*-1,2,3-triazole **2a** (48 mg, 0.3 mmol) using benzene/EtOAc mixture (50:1) as eluent for chromatography. White solid (85 mg, yield 62%). M.p. 223–224 °C (CHCl<sub>3</sub>). <sup>1</sup>H NMR (400 MHz, CDCl<sub>3</sub>) δ 7.41–7.40 (m, 2H), 7.34–7.32 (m, 2H), 7.26–7.22 (m, 4H), 7.18–7.15 (m, 1H), 7.09–7.07 (m, 2H), 6.84–6.82

(m, 2H), 6.70 (s, 1H), 6.20 (s, 1H), 3.48 (s, 3H), 2.31 (s, 3H), 1.39 (s, 9H).  $^{13}\text{C}$  NMR (100 MHz,  $\text{CDCl}_3$ )  $\delta$  150.4, 142.2, 136.6, 134.3, 132.9, 129.6, 128.7, 128.1, 127.3, 127.1, 127.0, 125.6, 125.1, 122.4, 119.2, 113.4, 35.2, 34.5, 31.3, 21.4. HRMS–ESI:  $[\text{M} + \text{Na}]^+$  calcd for  $\text{C}_{28}\text{H}_{30}\text{N}_2\text{NaO}_2\text{S}^+$  481.1926, found 481.1915.

***N*-(2-(4-Chlorophenyl)-1-methyl-4-phenyl-1*H*-pyrrol-3-yl)-4-methylbenzenesulfonamide (3t)**

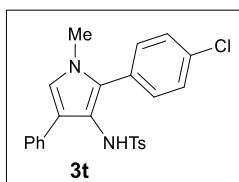

Compound **3t** was prepared according to the general procedure from 4-(4-chlorophenyl)-1-tosyl-1*H*-1,2,3-triazole **1g** (180 mg, 0.54 mmol) and 1-methyl-4-phenyl-1*H*-1,2,3-triazole **2a** (48 mg, 0.3 mmol) using benzene/EtOAc mixture (50:1) as eluent for chromatography. White solid (56 mg, yield 43%). M.p. 195–196 °C ( $\text{CHCl}_3$ ).  $^1\text{H}$  NMR (400 MHz,  $\text{CDCl}_3$ )  $\delta$  7.31–7.29 (m, 3H), 7.26–7.22 (m, 4H), 7.20–7.17 (m, 3H), 6.87–6.85 (m, 2H), 6.70 (s, 1H), 6.12 (s, 1H), 3.50 (s, 3H), 2.33 (s, 3H).  $^{13}\text{C}$  NMR (100 MHz,  $\text{CDCl}_3$ )  $\delta$  142.7, 136.9, 133.9, 133.8, 131.7, 131.5, 128.81, 128.76, 128.5, 128.2, 127.5, 127.0, 125.8, 122.9, 119.7, 113.9, 35.2, 21.4. HRMS–ESI:  $[\text{M} + \text{Na}]^+$  calcd for  $\text{C}_{24}\text{H}_{21}^{35}\text{ClN}_2\text{NaO}_2\text{S}^+$  459.0904, found 459.0905.

***N*-(2-(3-Methoxyphenyl)-1-methyl-4-phenyl-1*H*-pyrrol-3-yl)-4-methylbenzenesulfonamide (3u)**

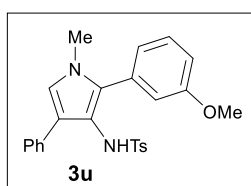

Compound **3u** was prepared according to the general procedure from 4-(3-methoxyphenyl)-1-tosyl-1*H*-1,2,3-triazole **1h** (178 mg, 0.54 mmol) and 1-methyl-4-phenyl-1*H*-1,2,3-triazole **2a** (48 mg, 0.3 mmol) using benzene/EtOAc mixture (50:1) as eluent for chromatography. White solid (91 mg, yield 70%). 1 mmol scale synthesis of compound **3u** (0.263 g, yield 61%) was carried out according to the general procedure from triazole **1h** (0.159 g, 1 mmol) and triazole **2a** (0.592 g, 1.8 mmol). M.p. 167–168 °C ( $\text{CHCl}_3$ ).  $^1\text{H}$  NMR (400 MHz,  $\text{CDCl}_3$ )  $\delta$  7.40–7.38 (m, 2H), 7.27–7.15 (m, 6H), 6.88–6.75 (m, 5H), 6.70 (s, 1H), 6.31 (s, 1H), 3.82 (s, 3H), 3.50 (s, 3H), 2.31 (s, 3H).  $^{13}\text{C}$  NMR (100 MHz,  $\text{CDCl}_3$ )  $\delta$  159.4, 142.4, 136.8, 134.2, 132.6, 131.4, 129.2, 128.8,

128.2, 127.4, 127.0, 125.6, 122.6, 122.4, 119.5, 115.5, 113.6, 113.4, 55.2, 35.2, 21.3.  
HRMS–ESI:  $[M + Na]^+$  calcd for  $C_{25}H_{24}N_2NaO_3S^+$  455.1400, found 455.1395.

#### 4. Synthesis of triazolium ylides **20**

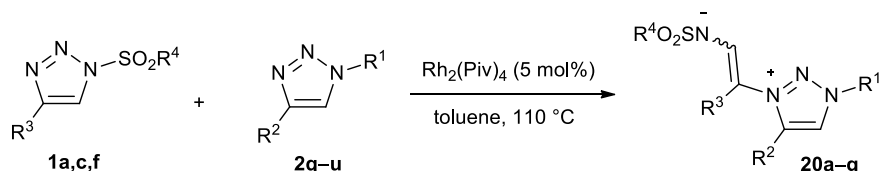

##### General procedure

*General procedure:* A screw-cap tube was charged with 1-sulfonyl-1H-1,2,3-triazole **1a,c,f** (0.54 mmol), 1-alkyl-4-alkyl-1H-1,2,3-triazole **2q-u** (0.3 mmol), and toluene (0.6 mL). To the mixture heated to 110 °C  $Rh_2(Piv)_4$  (9.1 mg, 0.015 mmol) was added, and the cap was immediately screwed. The reaction mixture was heated at this temperature under stirring until full consumption of the starting materials (~15 min, control by TLC). After cooling the reaction to room temperature, benzene (3 mL) and hexane (6 mL) were added (in some cases  $Et_2O$  (3 mL) was additionally added). The resulting precipitate was filtered off and washed with benzene/hexane mixture (1:2).

##### (2-(1-Methyl-4-(phenoxyethyl)-1H-1,2,3-triazol-3-ium-3-yl)-2-phenylvinyl)(tosyl)amide (**20a**)

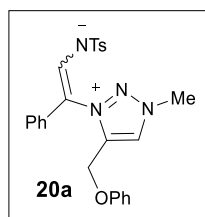

Compound **20a** was prepared according to the general procedure from 4-phenyl-1-tosyl-1H-1,2,3-triazole **1a** (162 mg, 0.54 mmol) and 1-methyl-4-(phenoxyethyl)-1H-1,2,3-triazole **2q** (57 mg, 0.3 mmol). Brown solid (123 mg, yield 89%). Mp: 152 °C (benzene/hexane, dec.).  $^1H$  NMR (400 MHz,  $DMSO-d_6$ )  $\delta$  9.03 (s, 1H), 7.87 (s, 1H), 7.56–7.54 (m, 2H), 7.25–7.18 (m, 6H), 7.06–7.03 (m, 1H), 7.00–6.93 (m, 3H), 6.68–6.66 (m, 2H), 4.94 (s, 2H), 4.35 (s, 3H), 2.29 (s, 3H).  $^{13}C$  NMR (100 MHz,  $DMSO-d_6$ )  $\delta$  157.4, 142.0, 136.6, 130.7, 130.0, 129.5, 129.1, 125.8, 124.8, 122.2, 121.6, 115.2, 114.9, 59.4, 40.7, 21.3. HRMS–ESI:  $[M + H]^+$  calcd for  $C_{25}H_{25}N_4O_3S^+$  461.1642, found 461.1627.

**(2-(4-((4-Chlorophenoxy)methyl)-1-methyl-1*H*-1,2,3-triazol-3-ium-3-yl)-2-phenylvinyl)-  
(tosyl)amide (20b)**

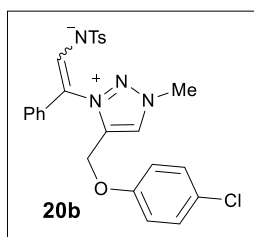

Compound **20b** was prepared according to the general procedure from 4-phenyl-1-tosyl-1*H*-1,2,3-triazole **1a** (162 mg, 0.54 mmol) and 4-((4-chlorophenoxy)methyl)-1-methyl-1*H*-1,2,3-triazole **2r** (67 mg, 0.3 mmol). Brown-yellow solid (110 mg, yield 74%). Mp: 154 °C (benzene/hexane, dec.). <sup>1</sup>H NMR (400 MHz, DMSO-*d*<sub>6</sub>) δ 9.01 (s, 1H), 7.87 (s, 1H), 7.55–7.53 (m, 2H), 7.27–7.16 (m, 6H), 7.06–7.03 (m, 1H), 6.94–6.93 (m, 2H), 6.75–6.73 (m, 2H), 4.98 (s, 2H), 4.34 (s, 3H), 2.28 (s, 3H). <sup>13</sup>C NMR (100 MHz, DMSO-*d*<sub>6</sub>) δ 156.2, 143.6, 141.7, 140.7, 140.4, 136.6, 130.7, 130.2, 129.8, 129.5, 129.3, 129.1, 128.5, 128.4, 127.0, 126.0, 126.0, 125.8, 125.8, 124.9, 123.5, 121.6, 117.0, 116.9, 106.4, 59.9, 40.7, 21.3. HRMS–ESI: [M + H]<sup>+</sup> calcd for C<sub>25</sub>H<sub>24</sub><sup>35</sup>ClN<sub>4</sub>O<sub>3</sub>S<sup>+</sup> 495.1252, found 495.1257.

**(2-(1-Benzyl-4-((4-chlorophenoxy)methyl)-1*H*-1,2,3-triazol-3-ium-3-yl)-2-phenylvinyl)-  
(tosyl)amide (20c)**

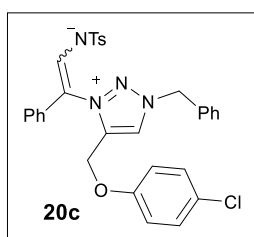

Compound **20c** was prepared according to the general procedure from 4-phenyl-1-tosyl-1*H*-1,2,3-triazole **1a** (162 mg, 0.54 mmol) and 1-benzyl-4-((4-chlorophenoxy)methyl)-1*H*-1,2,3-triazole **2s** (90 mg, 0.3 mmol). Yellow-orange solid (140 mg, yield 82%). M.p. 182 °C (benzene/hexane, dec.). <sup>1</sup>H NMR (400 MHz, DMSO-*d*<sub>6</sub>) δ 9.18 (s, 1H), 7.85 (s, 1H), 7.53–7.42 (m, 7H), 7.27–7.15 (m, 6H), 7.06–7.02 (m, 1H), 6.89–6.87 (m, 2H), 6.74–6.72 (m, 2H), 5.92 (s, 2H), 4.99 (s, 2H), 2.28 (s, 3H). <sup>13</sup>C NMR (100 MHz, DMSO-*d*<sub>6</sub>) δ 156.2, 142.2, 133.5, 130.0, 129.74, 129.71, 129.6, 129.5, 129.3, 129.2, 128.8, 127.0, 126.0, 125.8, 121.5, 116.9, 60.1, 57.0, 21.3. HRMS–ESI: [M + H]<sup>+</sup> calcd for C<sub>31</sub>H<sub>28</sub><sup>35</sup>ClN<sub>4</sub>O<sub>3</sub>S<sup>+</sup> 571.1565, found 571.1567.

**(2-(4-((4-Chlorophenoxy)methyl)-1-methyl-1*H*-1,2,3-triazol-3-ium-3-yl)-2-phenylvinyl)-(phenylsulfonyl)amide (20d)**

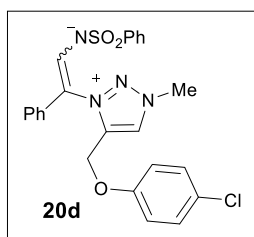

Compound **20d** was prepared according to the general procedure from 4-phenyl-1-(phenylsulfonyl)-1*H*-1,2,3-triazole **2c** (154 mg, 0.54 mmol) and 4-((4-chlorophenoxy)methyl)-1-methyl-1*H*-1,2,3-triazole **2r** (67 mg, 0.3 mmol). Pale yellow solid (143 mg, yield 99%). M.p. 203 °C (benzene/hexane, dec.). <sup>1</sup>H NMR (400 MHz, DMSO-*d*<sub>6</sub>) δ 9.01 (s, 1H), 7.88 (s, 1H), 7.71–7.65 (m, 2H), 7.46–7.38 (m, 3H), 7.28–7.18 (m, 4H), 7.09–7.02 (m, 1H), 6.97–6.91 (m, 2H), 6.72–6.67 (m, 2H), 4.98 (s, 2H), 4.34 (s, 3H). <sup>13</sup>C NMR (100 MHz, DMSO-*d*<sub>6</sub>) δ 156.2, 146.5, 141.6, 141.1, 136.6, 130.7, 130.6, 129.8, 129.13, 129.10, 128.9, 126.0, 125.7, 124.9, 121.6, 117.0, 116.8, 106.6, 59.8, 40.7. HRMS–ESI: [M + H]<sup>+</sup> calcd for C<sub>24</sub>H<sub>22</sub><sup>35</sup>ClN<sub>4</sub>O<sub>3</sub>S<sup>+</sup> 481.1096, found 481.1087.

**(2-(1-(4-Chlorophenyl)-4-(phenoxy)methyl)-1*H*-1,2,3-triazol-3-ium-3-yl)-2-phenylvinyl)-(tosyl)amide (20e)**

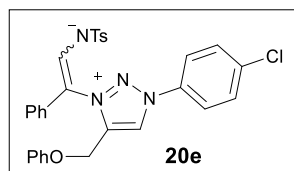

Compound **20e** was prepared according to the general procedure from 4-phenyl-1-tosyl-1*H*-1,2,3-triazole **1a** (162 mg, 0.54 mmol) and 1-(4-chlorophenyl)-4-(phenoxy)methyl-1*H*-1,2,3-triazole **2t** (86 mg, 0.3 mmol). Orange solid (140 mg, yield 84%). M.p. 180 °C (benzene/hexane, dec.). <sup>1</sup>H NMR (400 MHz, DMSO-*d*<sub>6</sub>) δ 9.85 (s, 1H), 8.10–8.08 (m, 2H), 7.95 (s, 1H), 7.80–7.78 (m, 2H), 7.60–7.58 (m, 2H), 7.27–7.19 (m, 6H), 7.11–7.09 (m, 3H), 7.01–6.98 (m, 1H), 6.73–6.71 (m, 2H), 5.03 (s, 2H), 2.29 (s, 3H). <sup>13</sup>C NMR (100 MHz, DMSO-*d*<sub>6</sub>) δ 157.5, 143.3, 136.6, 134.3, 130.6, 130.2, 130.1, 130.0, 129.6, 129.3, 129.2, 128.8, 128.4, 127.0, 125.9, 125.1, 123.9, 122.4, 122.3, 121.9, 115.3, 115.1, 60.1, 21.3. HRMS–ESI: [M + H]<sup>+</sup> calcd for C<sub>30</sub>H<sub>26</sub><sup>35</sup>ClN<sub>4</sub>O<sub>3</sub>S<sup>+</sup> 557.1409, found 557.1414.

**(2-(1-Benzyl-4-butyl-1*H*-1,2,3-triazol-3-ium-3-yl)-2-phenylvinyl)(tosyl)amide (20f)**

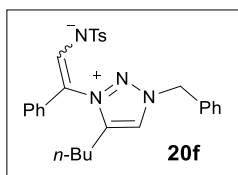

Compound **20f** was prepared according to the general procedure from 4-phenyl-1-tosyl-1*H*-1,2,3-triazole **1a** (162 mg 0.54 mmol) and 1-benzyl-4-butyl-1*H*-1,2,3-triazole **2u** (65 mg 0.3 mmol). Brown solid (45 mg, yield 30%). M.p. 86 °C (benzene/hexane/Et<sub>2</sub>O, dec.). <sup>1</sup>H NMR (400 MHz, DMSO-*d*<sub>6</sub>) δ 8.94 (s, 1H), 7.90 (s, 1H), 7.52–7.42 (m, 7H), 7.23–7.18 (m, 4H), 7.04–7.00 (m, 1H), 6.81–6.79 (m, 2H), 5.87 (s, 2H), 2.41–2.27 (m, 2H), 2.31 (s, 3H), 1.43–1.35 (m, 2H), 1.08–0.99 (m, 2H), 0.68 (t, *J* = 7.4 Hz, 3H). <sup>13</sup>C NMR (100 MHz, DMSO-*d*<sub>6</sub>) δ 146.8, 133.6, 129.7, 129.63, 129.55, 129.44, 129.38, 129.3, 129.2, 128.6, 125.8, 125.7, 120.7, 56.7, 28.7, 23.0, 21.9, 21.3, 13.7. HRMS–ESI: [M + H]<sup>+</sup> calcd for C<sub>28</sub>H<sub>31</sub>N<sub>4</sub>O<sub>2</sub>S<sup>+</sup> 487.2162, found 487.2150.

**(2-(4-(*tert*-Butyl)phenyl)-2-(4-((4-chlorophenoxy)methyl)-1-methyl-1*H*-1,2,3-triazol-3-ium-3-yl)vinyl)(tosyl)amide (20g)**

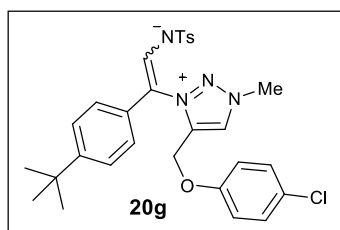

Compound **20g** was prepared according to the general procedure from 4-(4-(*tert*-butyl)phenyl)-1-tosyl-1*H*-1,2,3-triazole **1f** (192 mg, 0.54 mmol) and 4-((4-chlorophenoxy)methyl)-1-methyl-1*H*-1,2,3-triazole **2r** (67 mg, 0.3 mmol). Brown solid (83 mg, yield 50%). M.p. 110 °C (benzene/hexane, dec.). <sup>1</sup>H NMR (400 MHz, DMSO-*d*<sub>6</sub>) δ 9.01 (s, 1H), 7.79 (s, 1H), 7.55–7.53 (m, 2H), 7.26–7.22 (m, 4H), 7.18–7.16 (m, 2H), 6.88–6.85 (m, 2H), 6.76–6.73 (m, 2H), 4.98 (s, 2H), 4.33 (s, 3H), 2.28 (s, 3H), 1.24 (s, 9H). <sup>13</sup>C NMR (100 MHz, DMSO-*d*<sub>6</sub>) δ 156.2, 141.7, 140.4, 130.6, 129.7, 129.5, 129.2, 126.0, 125.9, 125.8, 121.6, 116.9, 60.1, 40.7, 34.5, 31.5, 21.3. HRMS–ESI: [M + H]<sup>+</sup> calcd for C<sub>29</sub>H<sub>32</sub><sup>35</sup>ClN<sub>4</sub>O<sub>3</sub>S<sup>+</sup> 551.1878, found 551.1878.



## 5. $^1\text{H}$ and $^{13}\text{C}$ NMR spectra

$^1\text{H}$  and  $^{13}\text{C}$  NMR spectra of compound **2k**

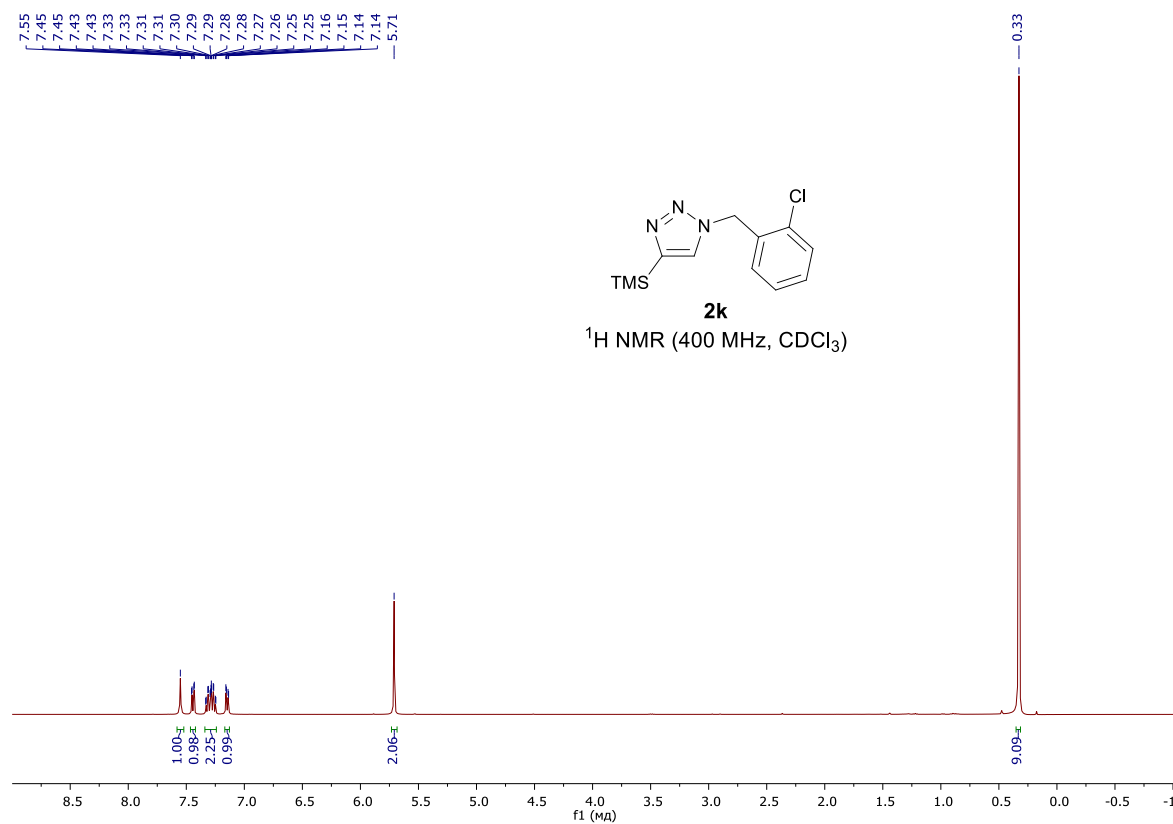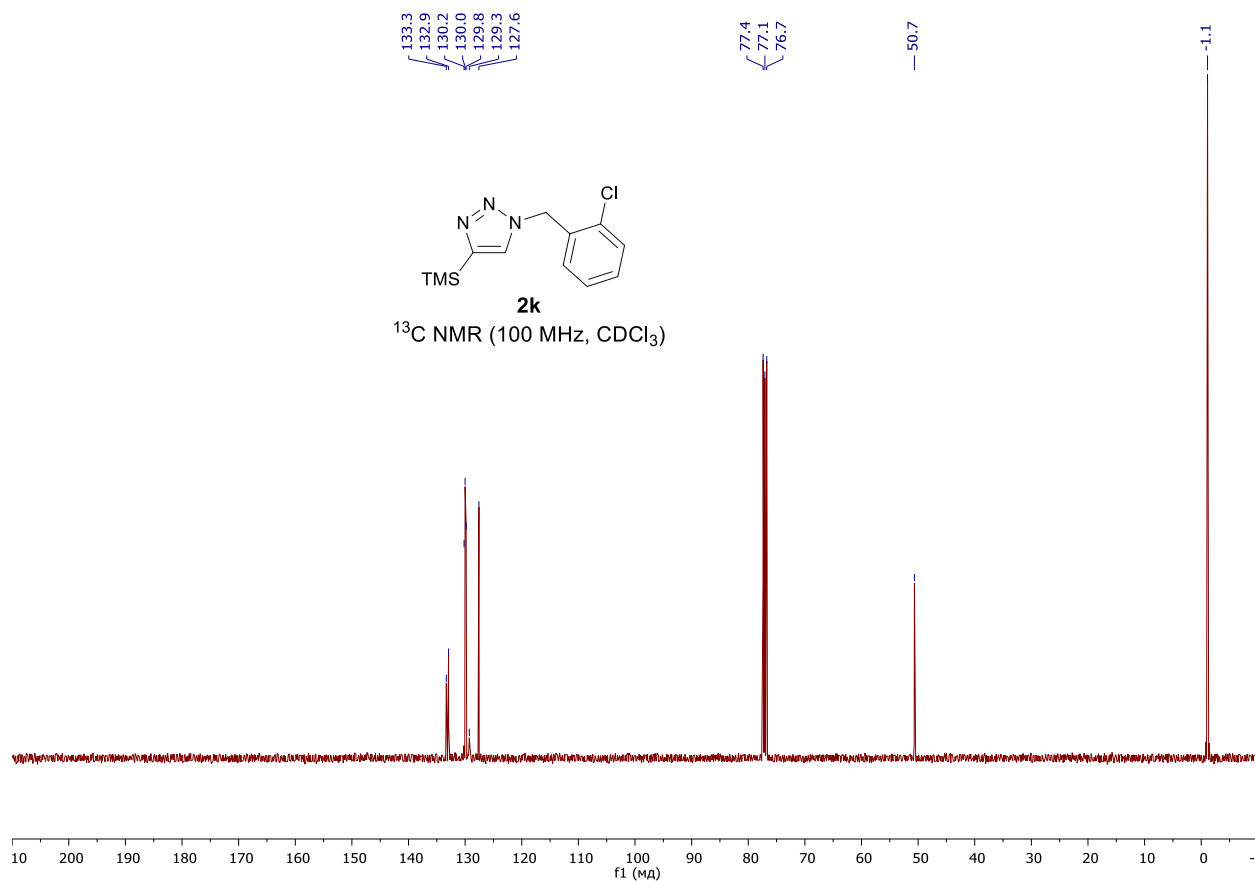

$^1\text{H}$  and  $^{13}\text{C}$  NMR spectra of compound **3a**

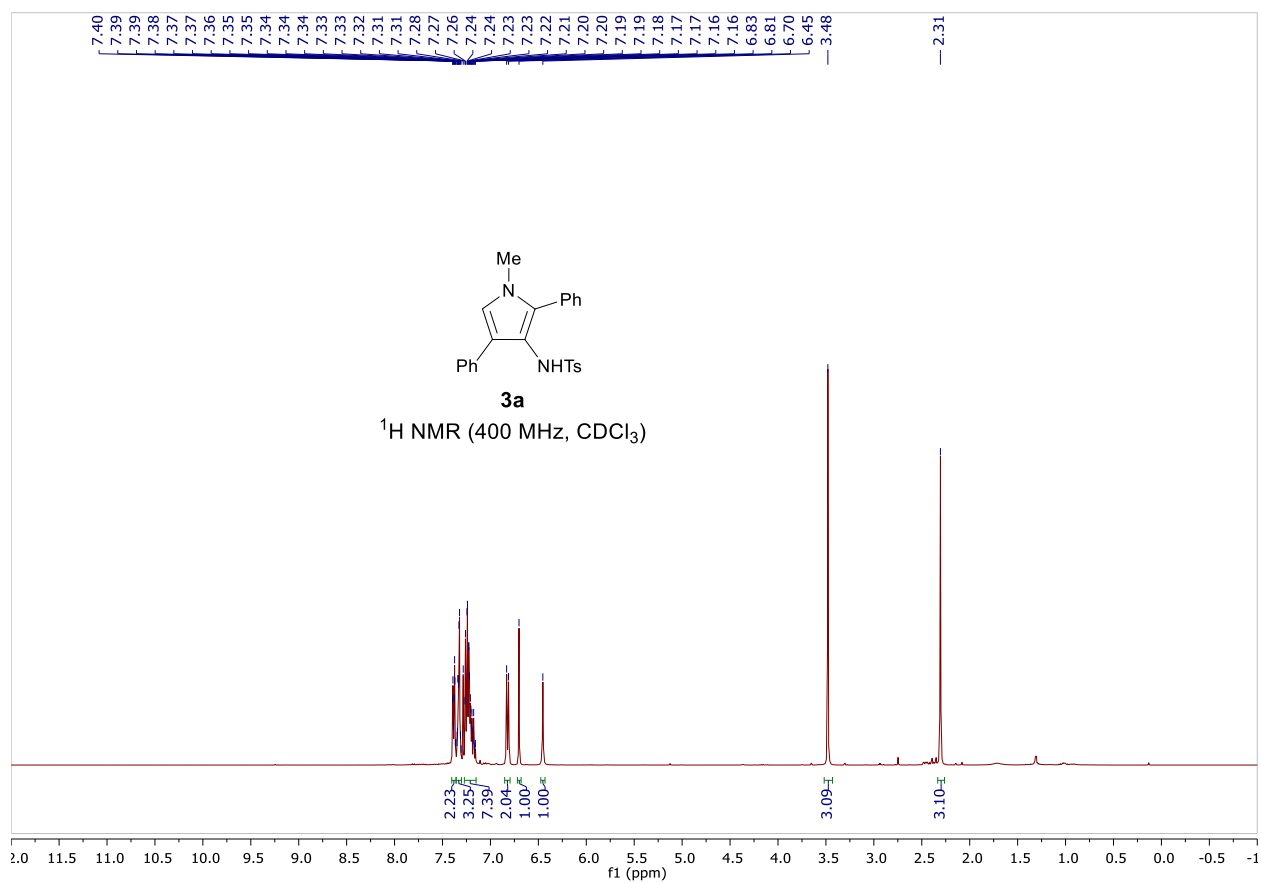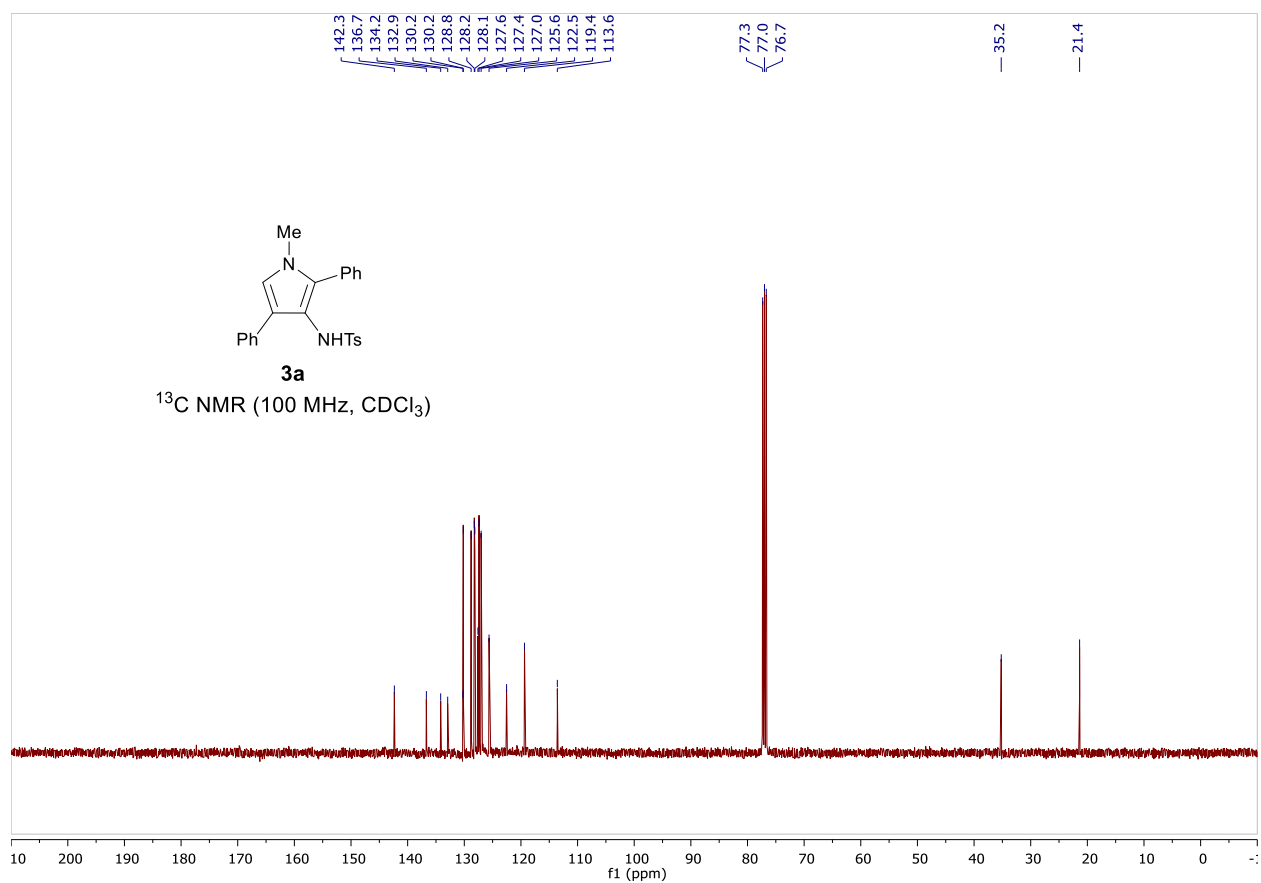

$^1\text{H}$  and  $^{13}\text{C}$  NMR spectra of compound **3b**

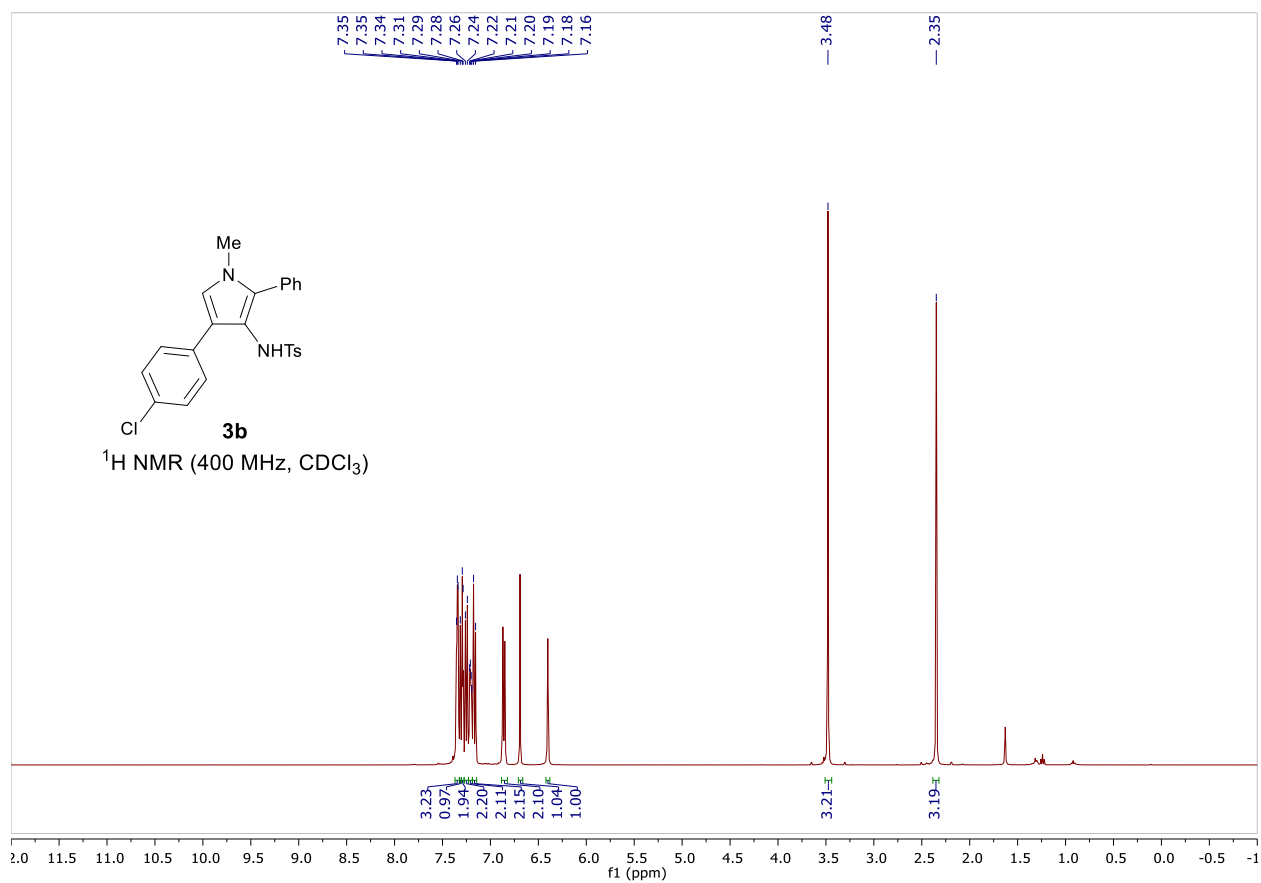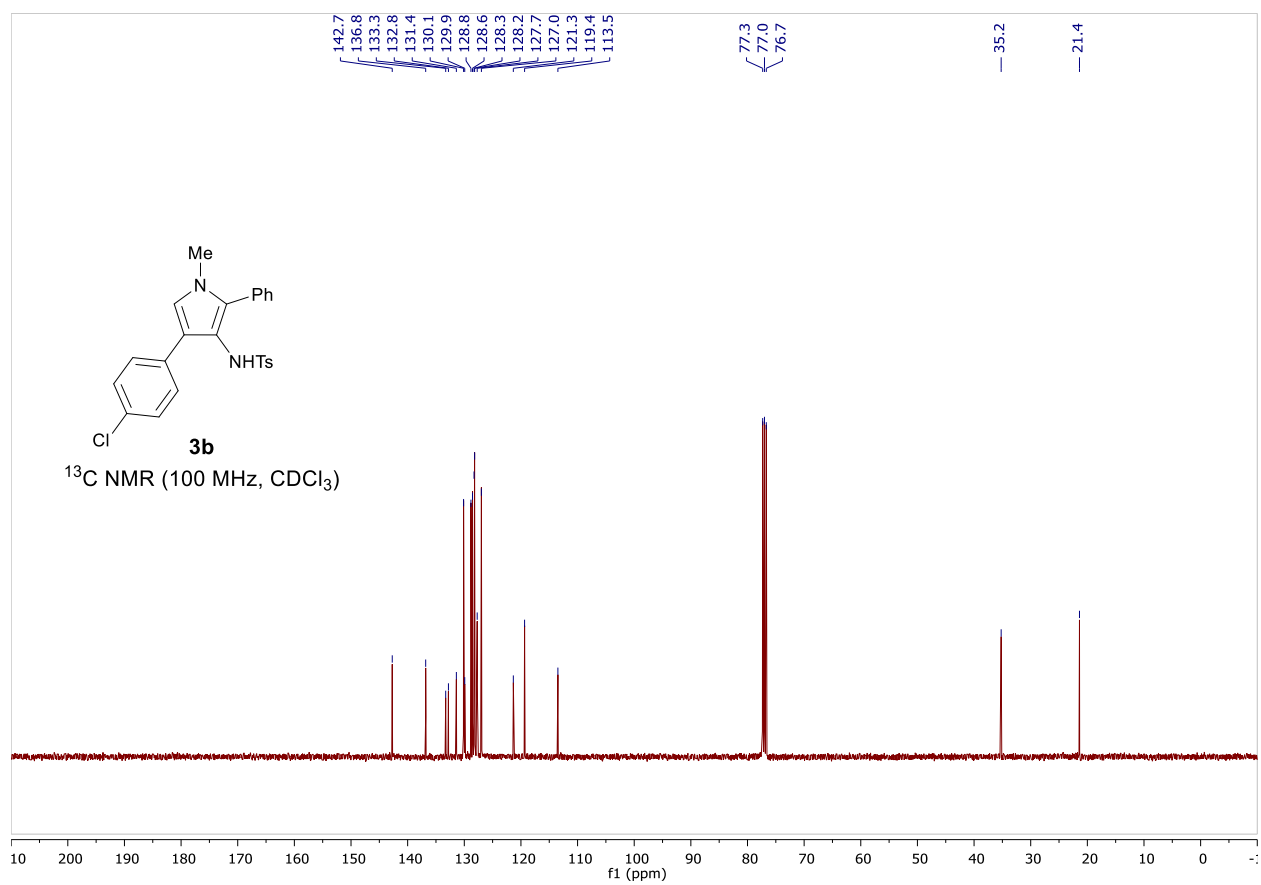

$^1\text{H}$  and  $^{13}\text{C}$  NMR spectra of compound **3c**

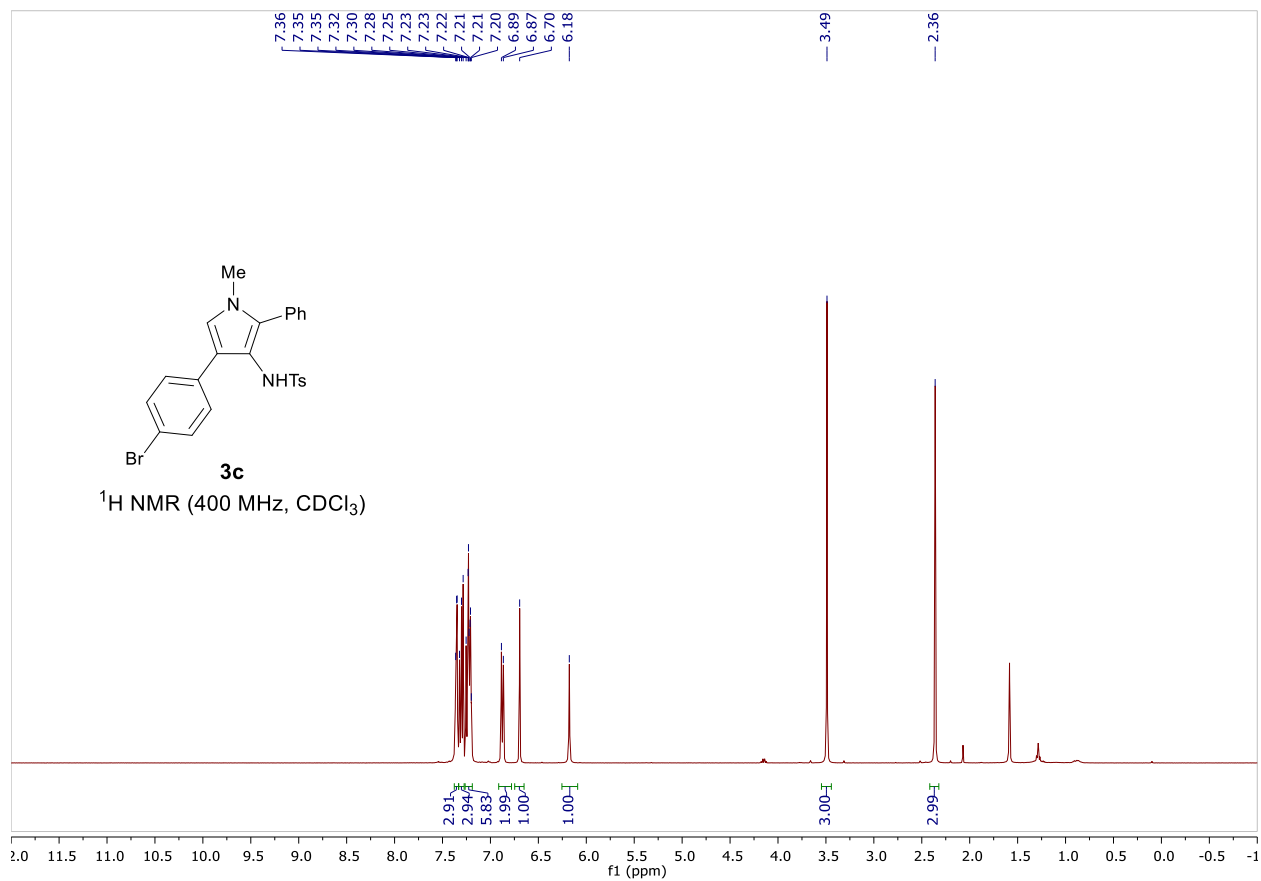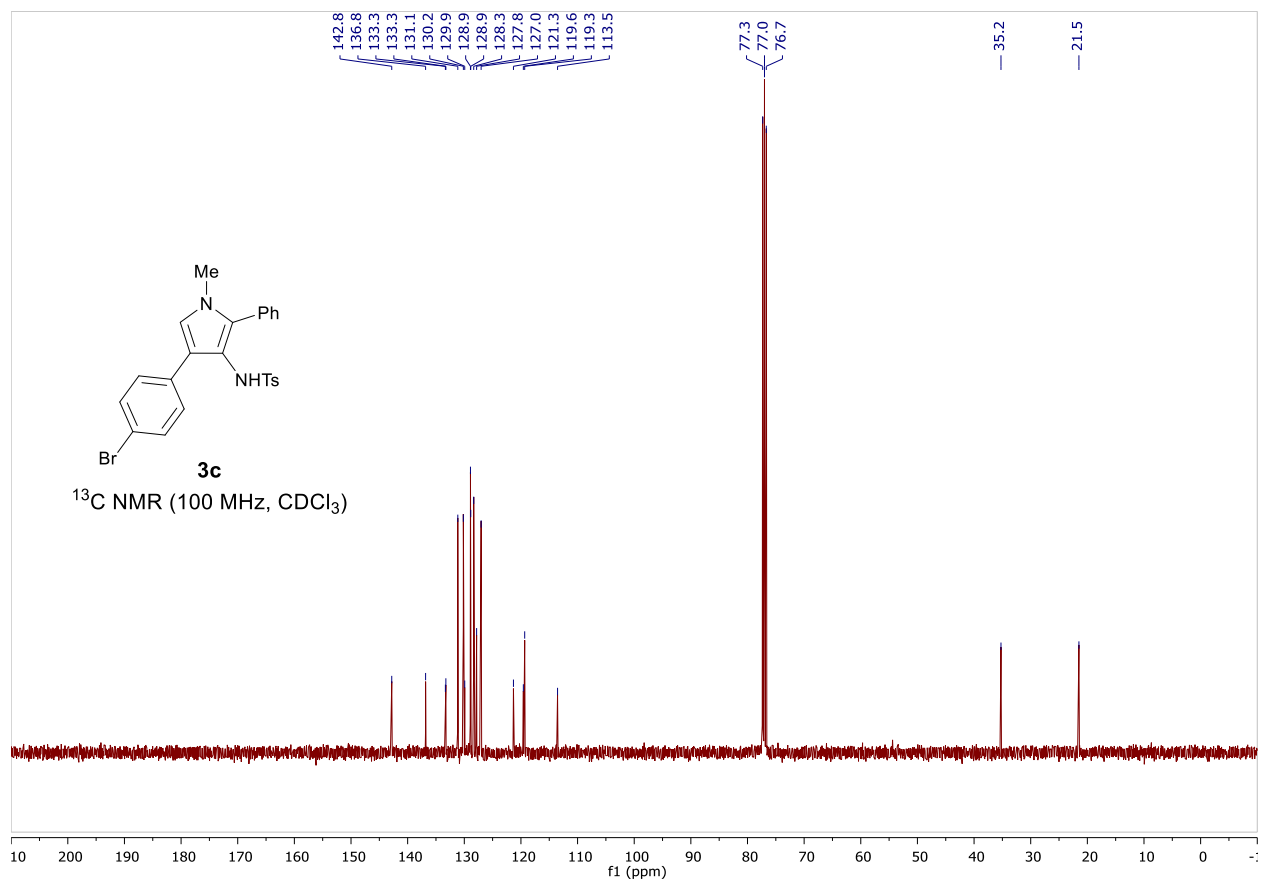

$^1\text{H}$  and  $^{13}\text{C}$  NMR spectra of compound **3d**

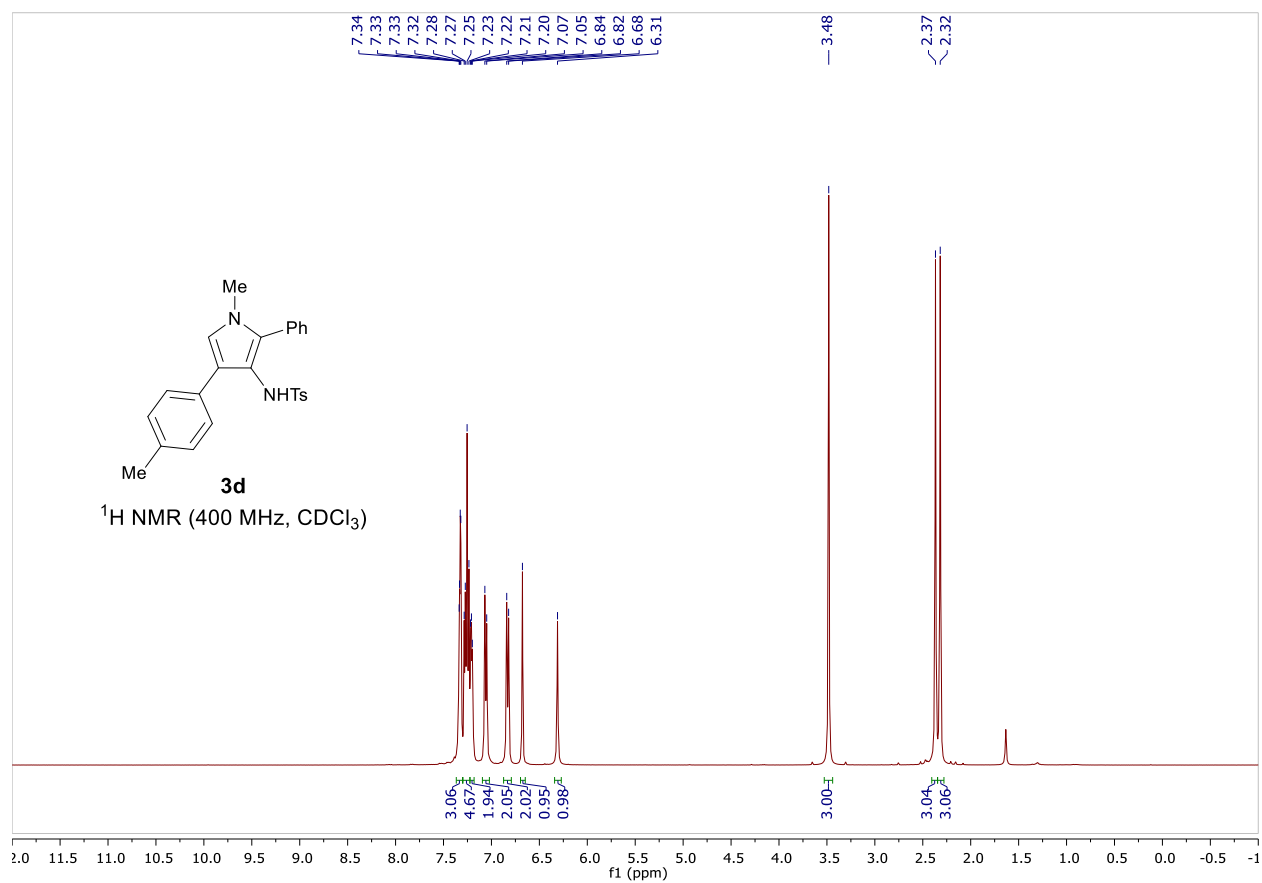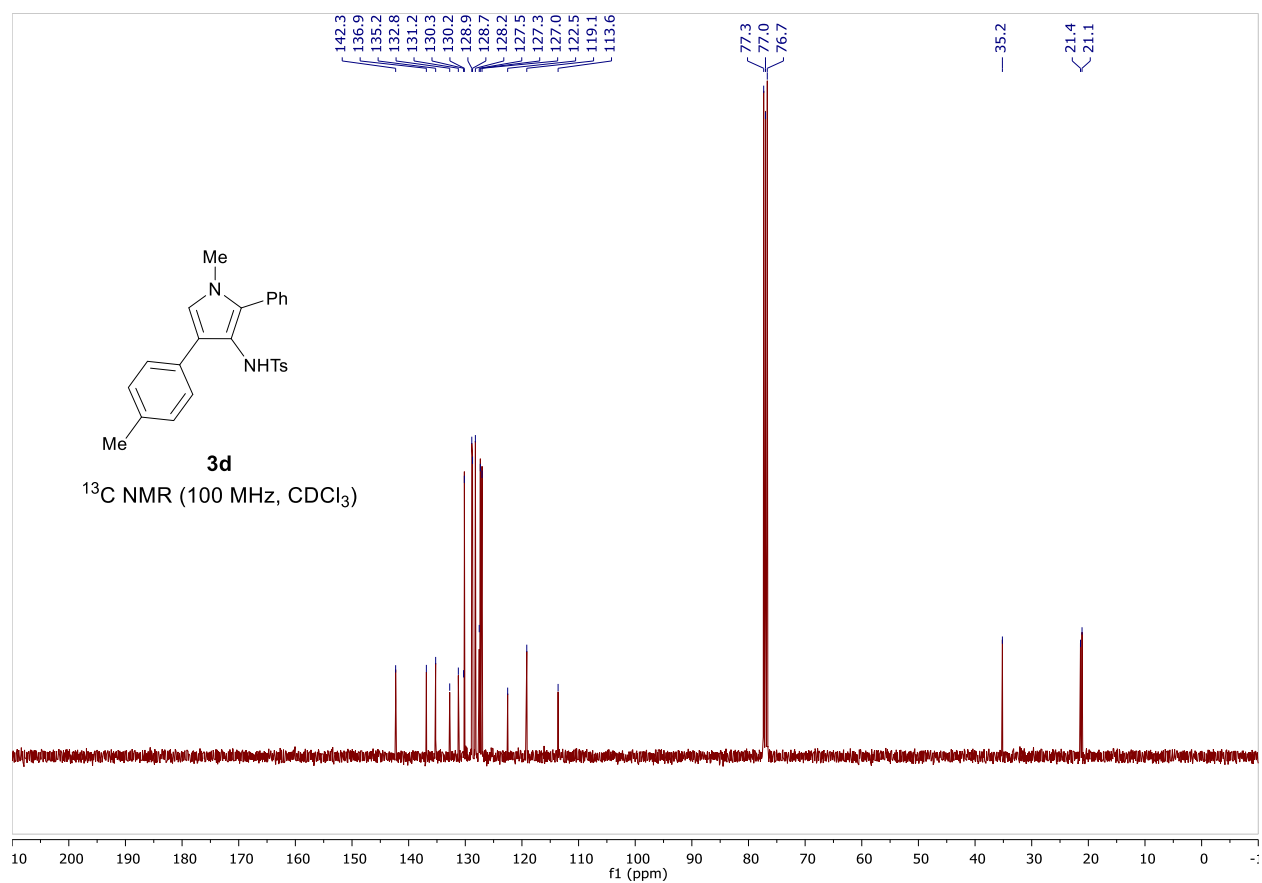

$^1\text{H}$  and  $^{13}\text{C}$  NMR spectra of compound **3e**

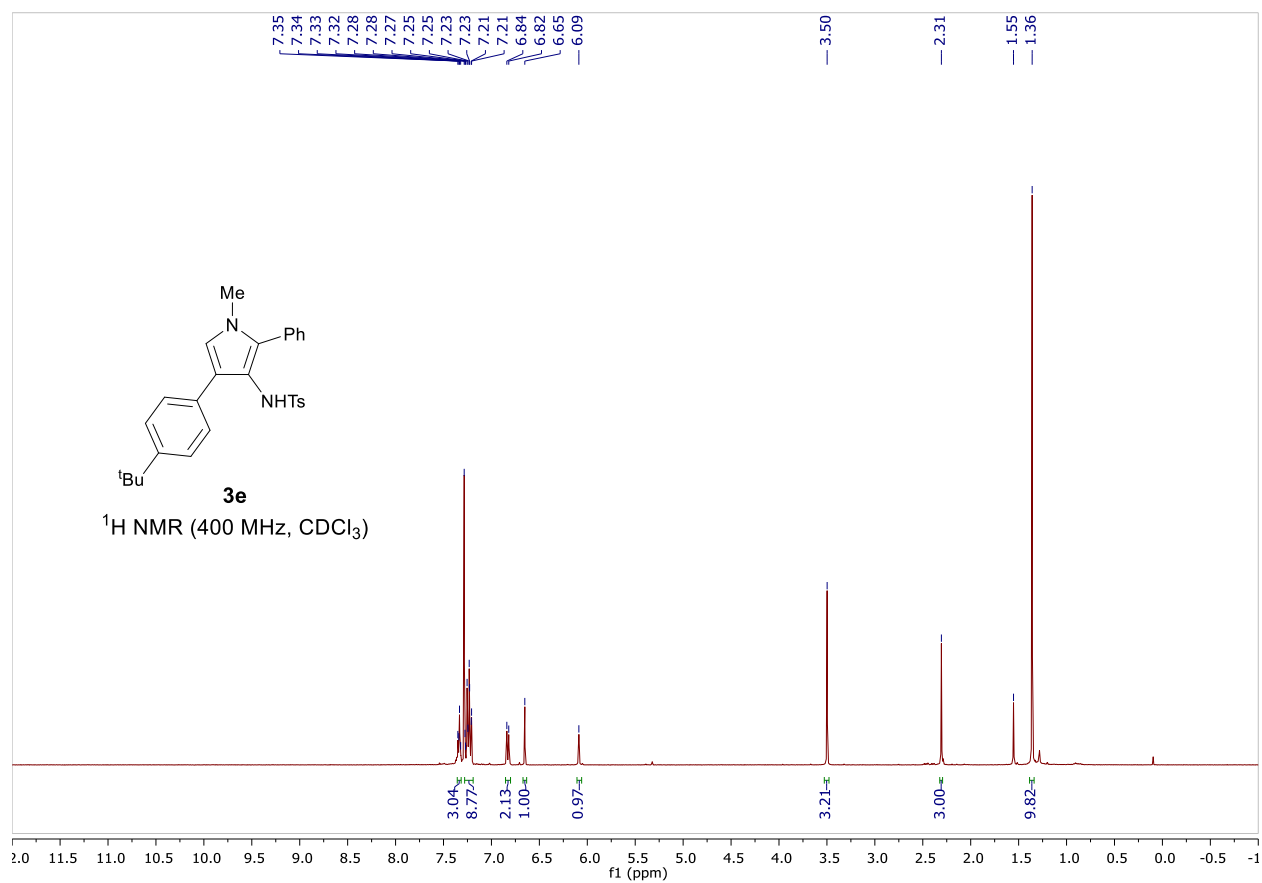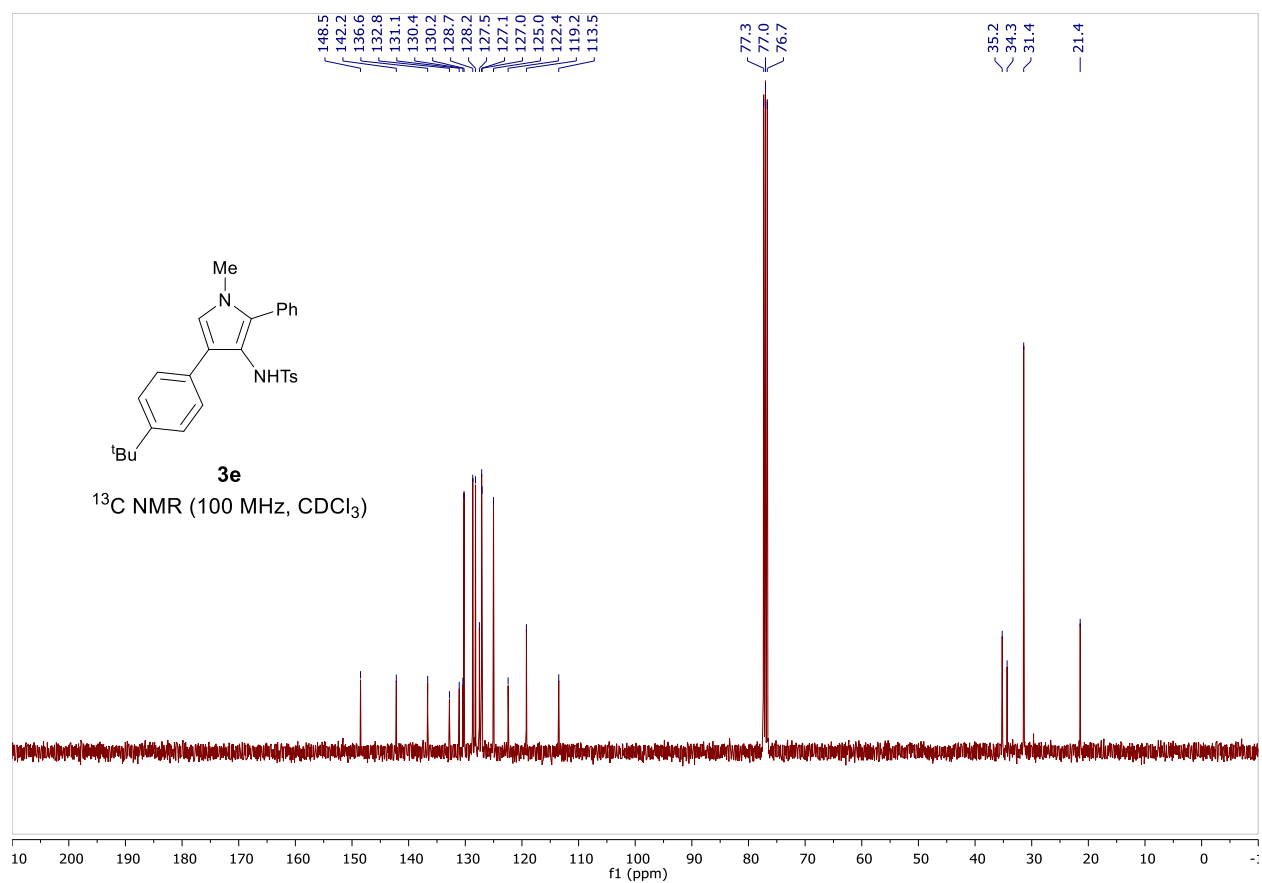

$^1\text{H}$  and  $^{13}\text{C}$  NMR spectra of compound **3f**

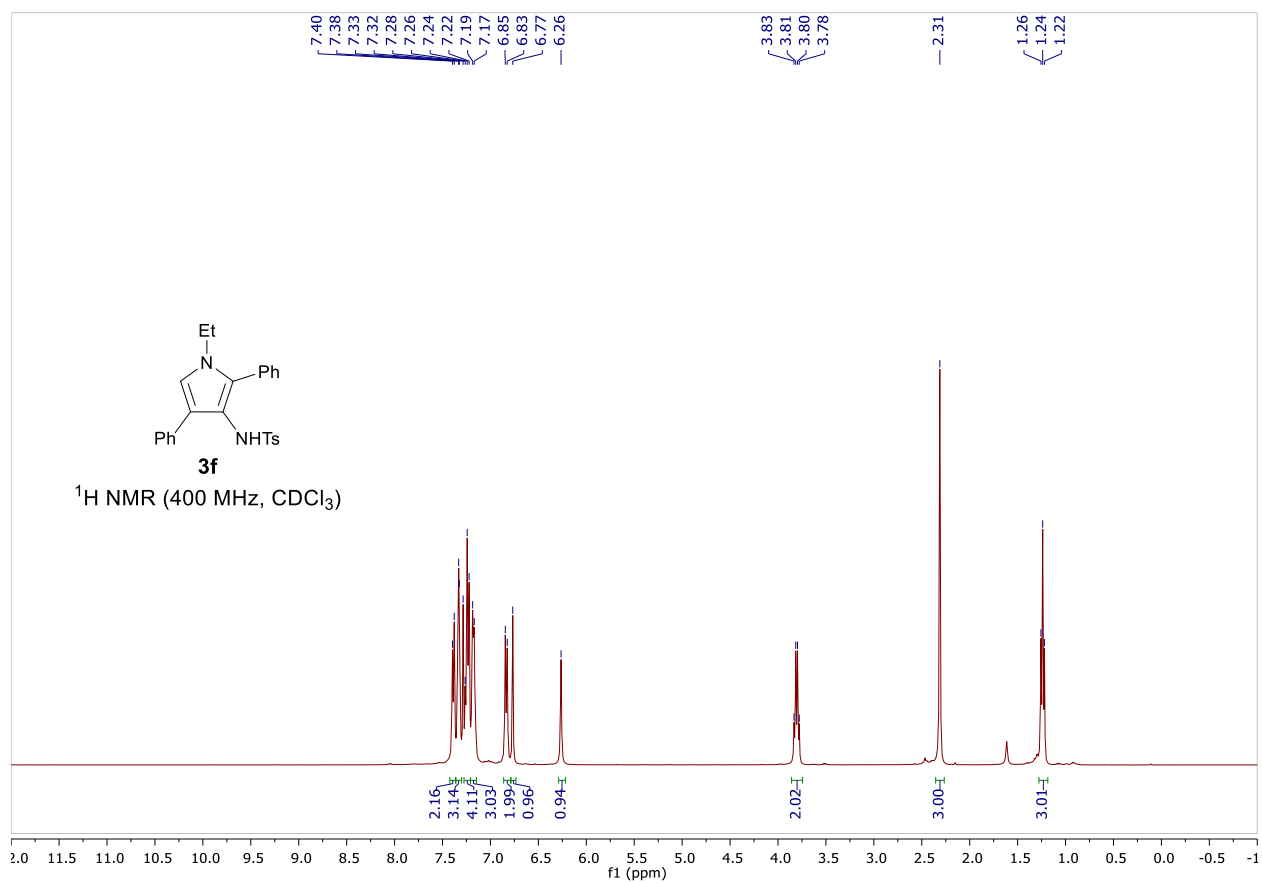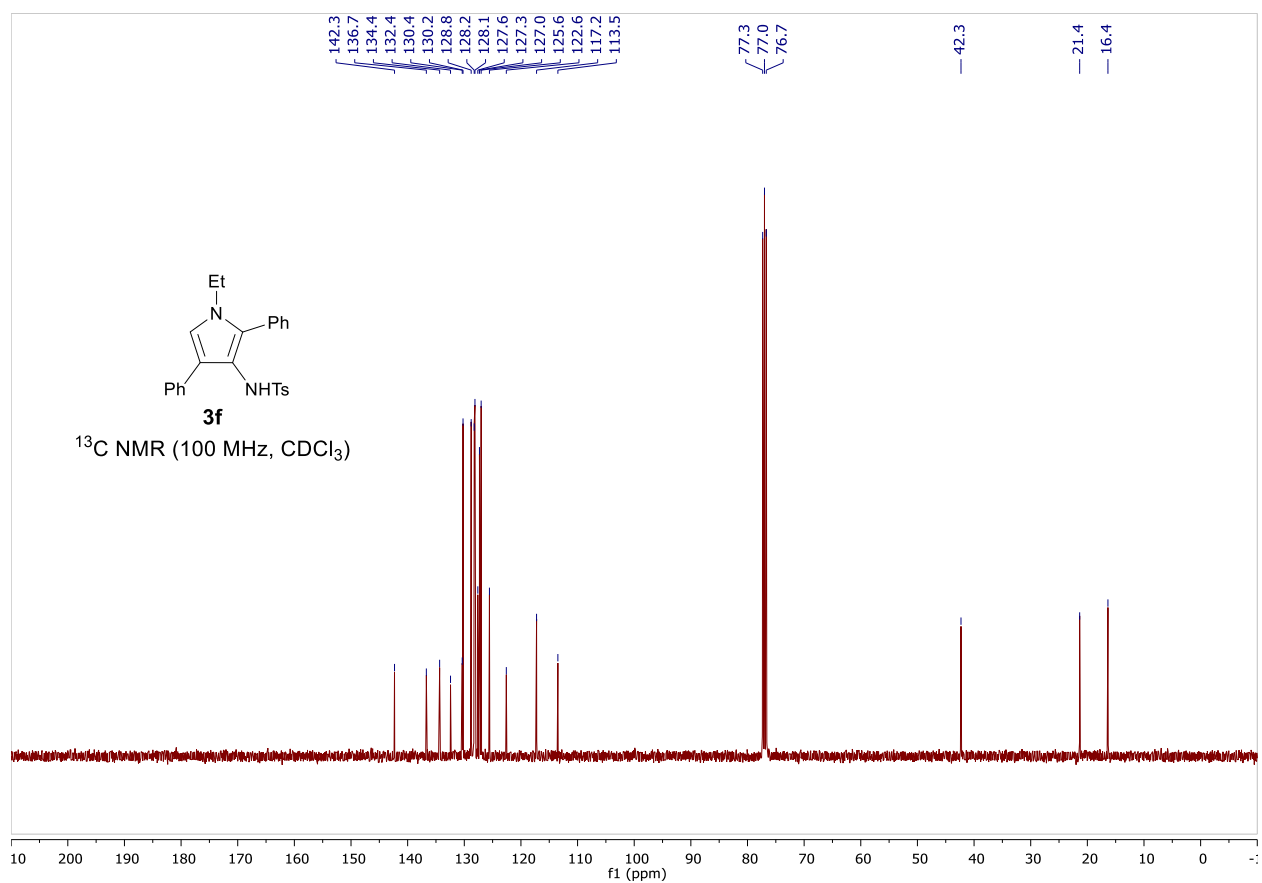

# $^1\text{H}$ and $^{13}\text{C}$ NMR spectra of compound **3g**

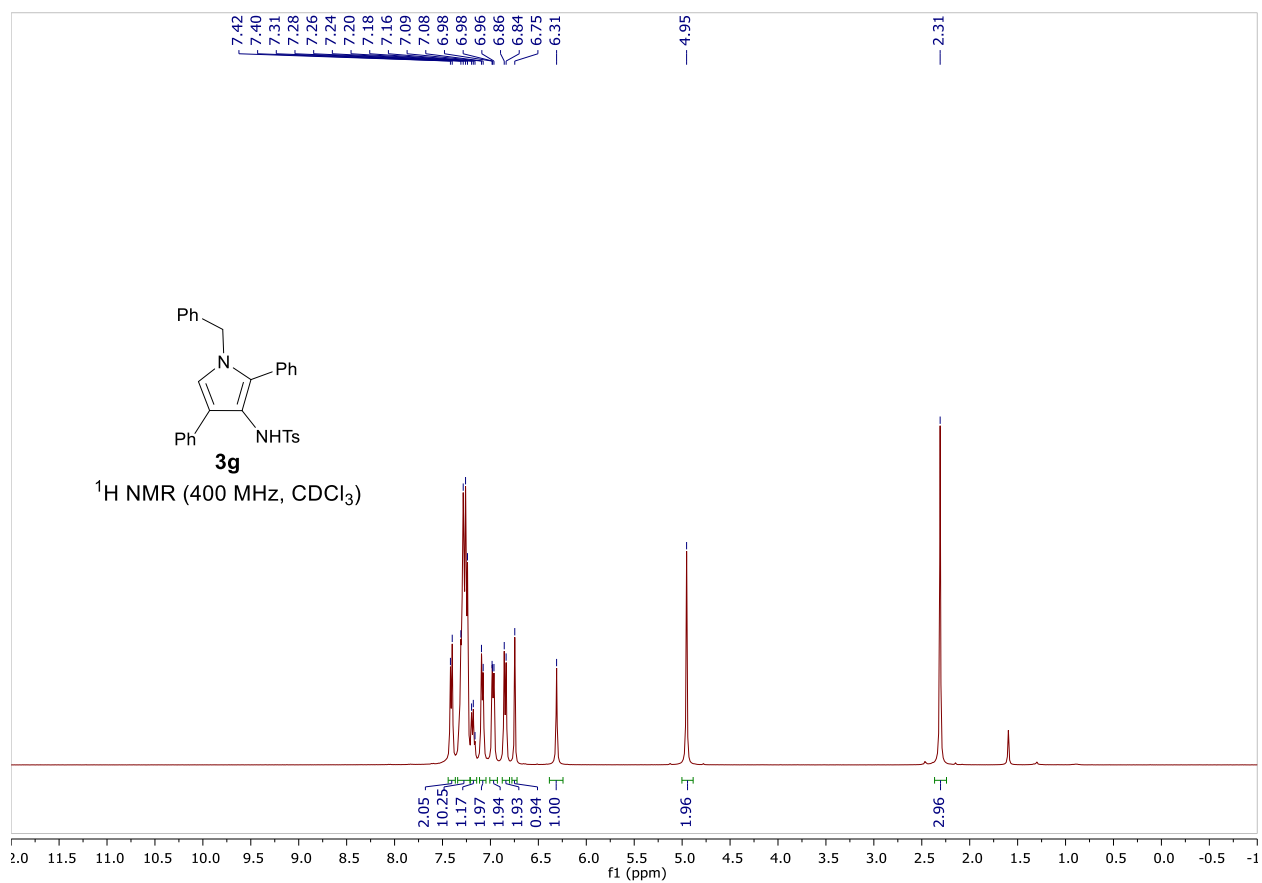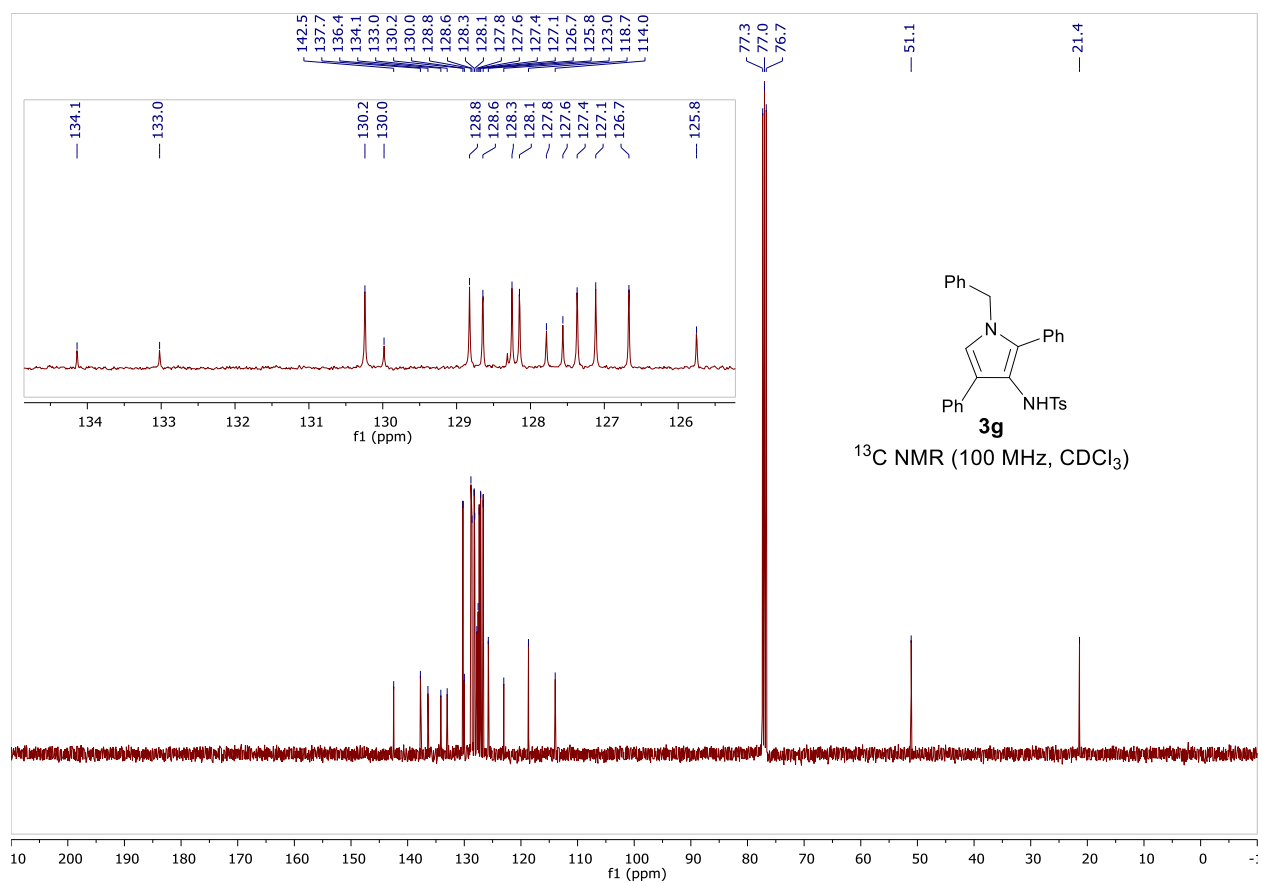



$^1\text{H}$  and  $^{13}\text{C}$  NMR spectra of compound **3h**

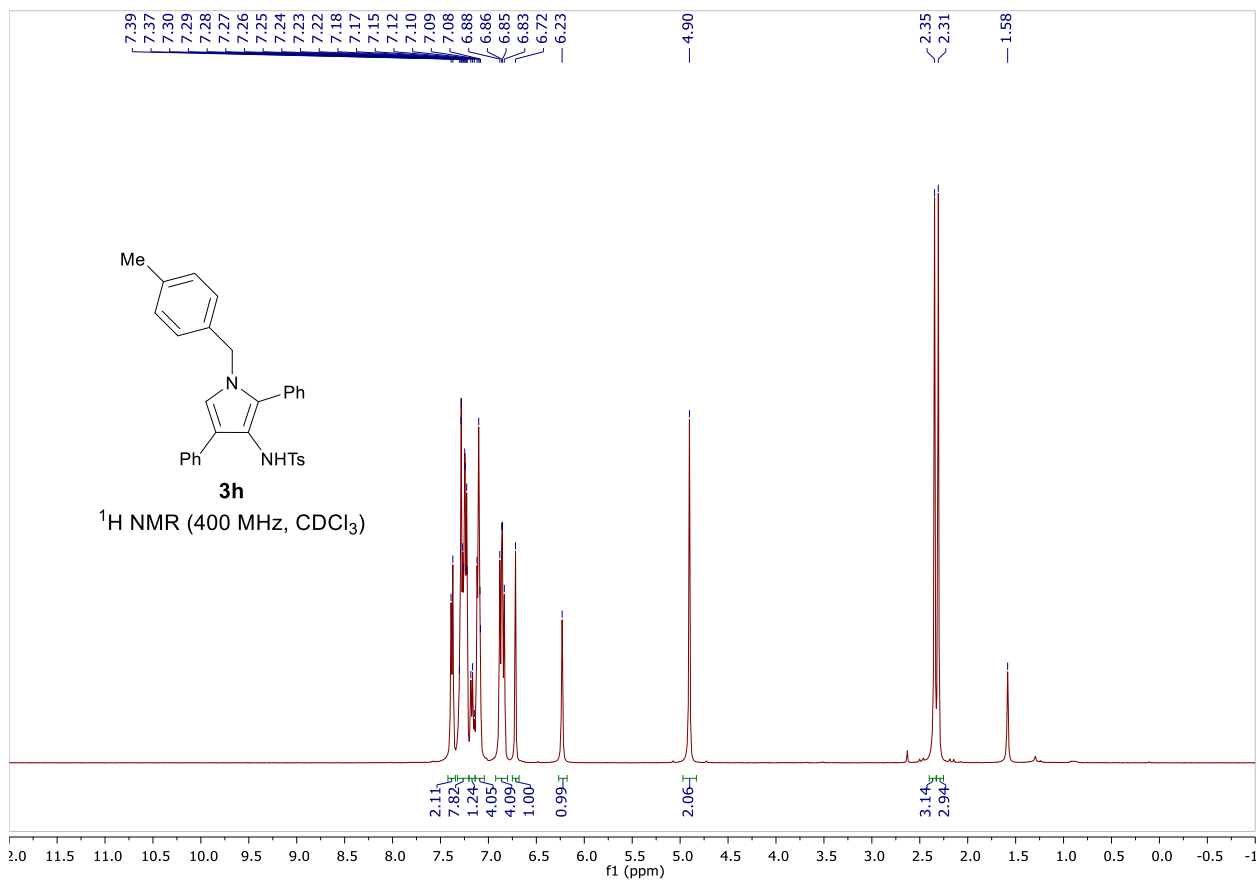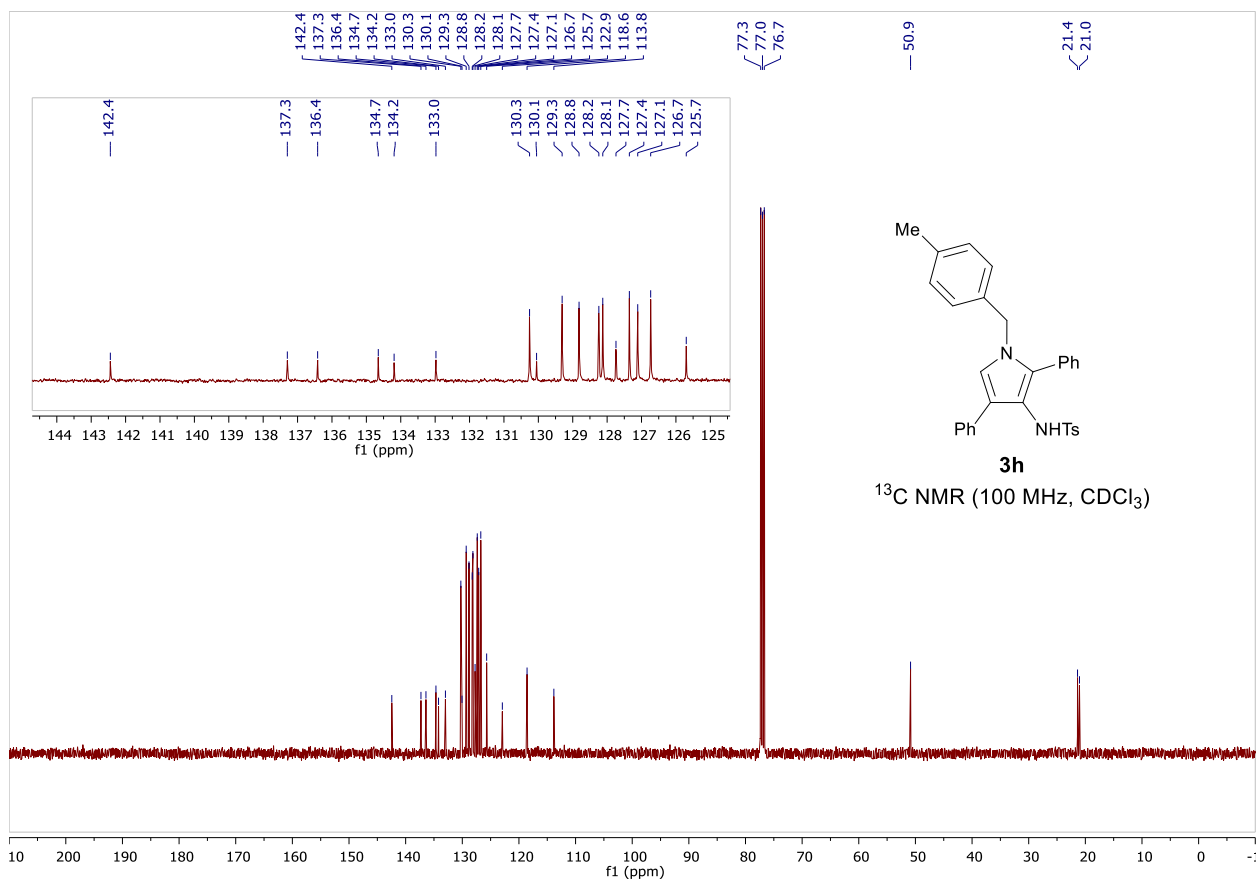

$^1\text{H}$  and  $^{13}\text{C}$  NMR spectra of compound **3i**

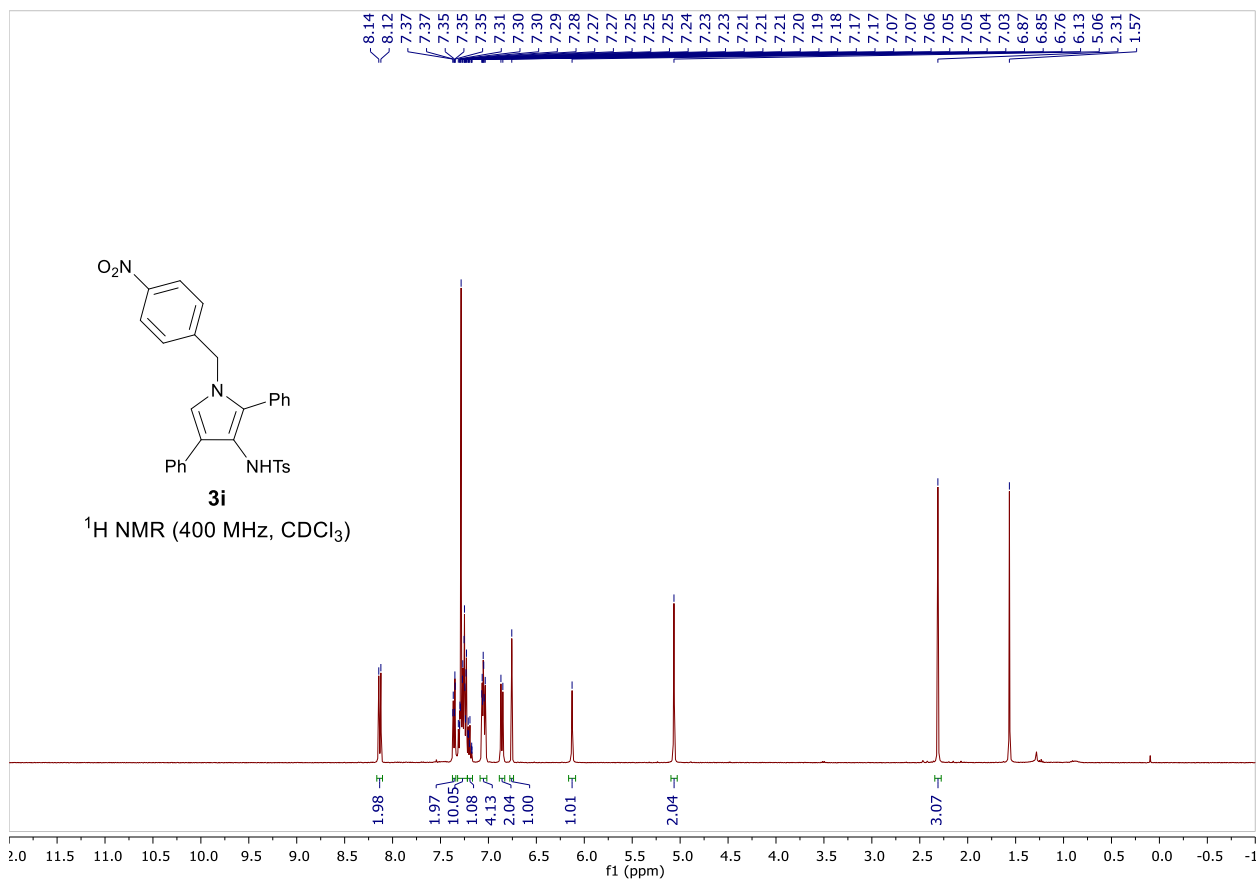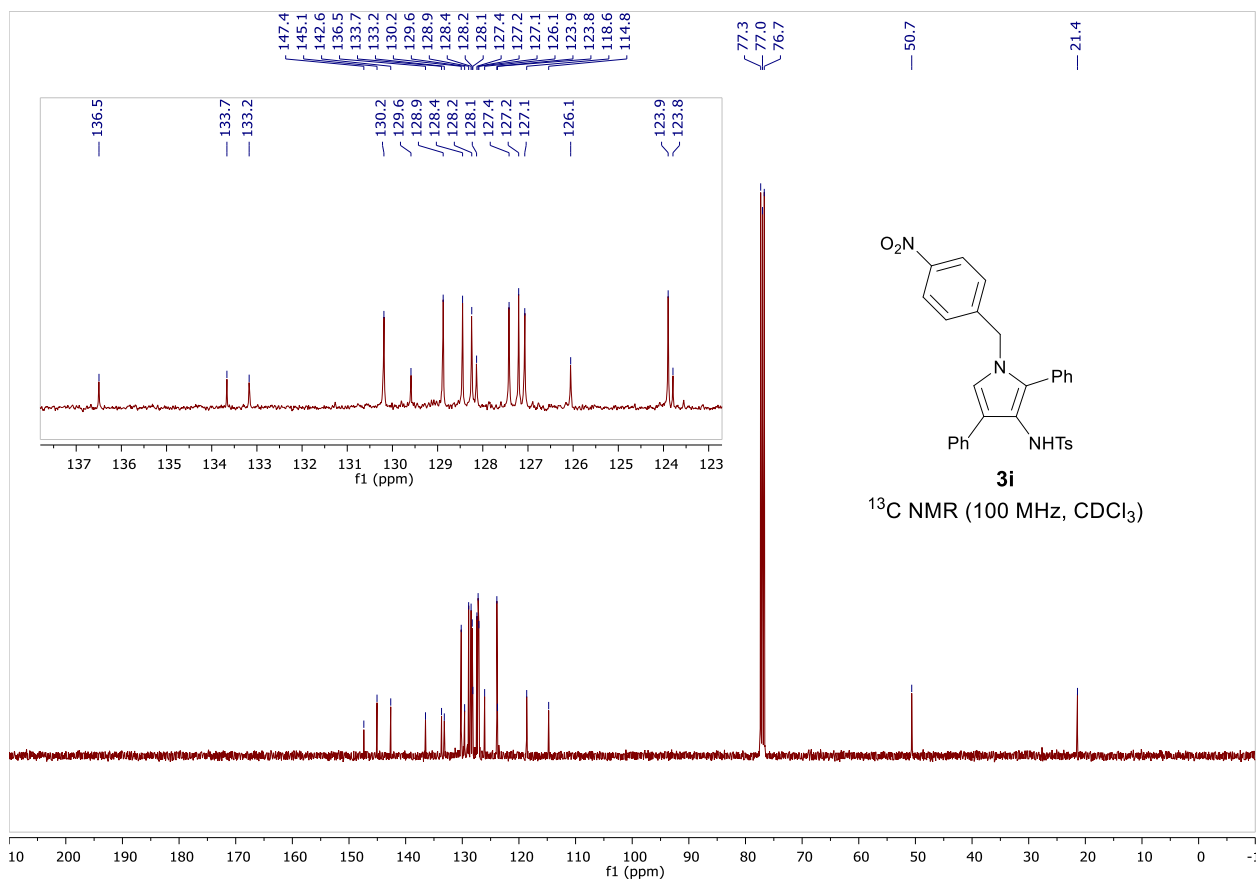

$^1\text{H}$  and  $^{13}\text{C}$  NMR spectra of compound **3j**

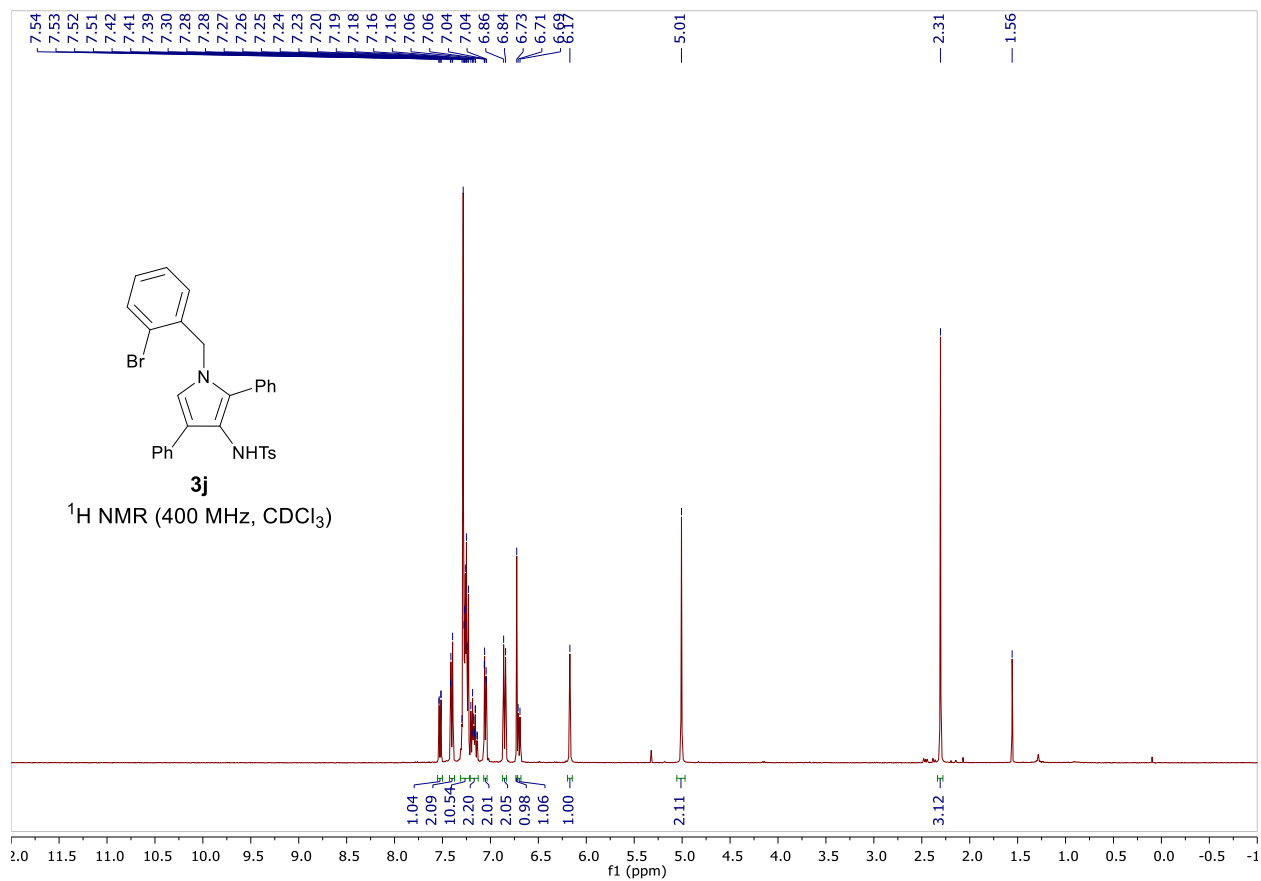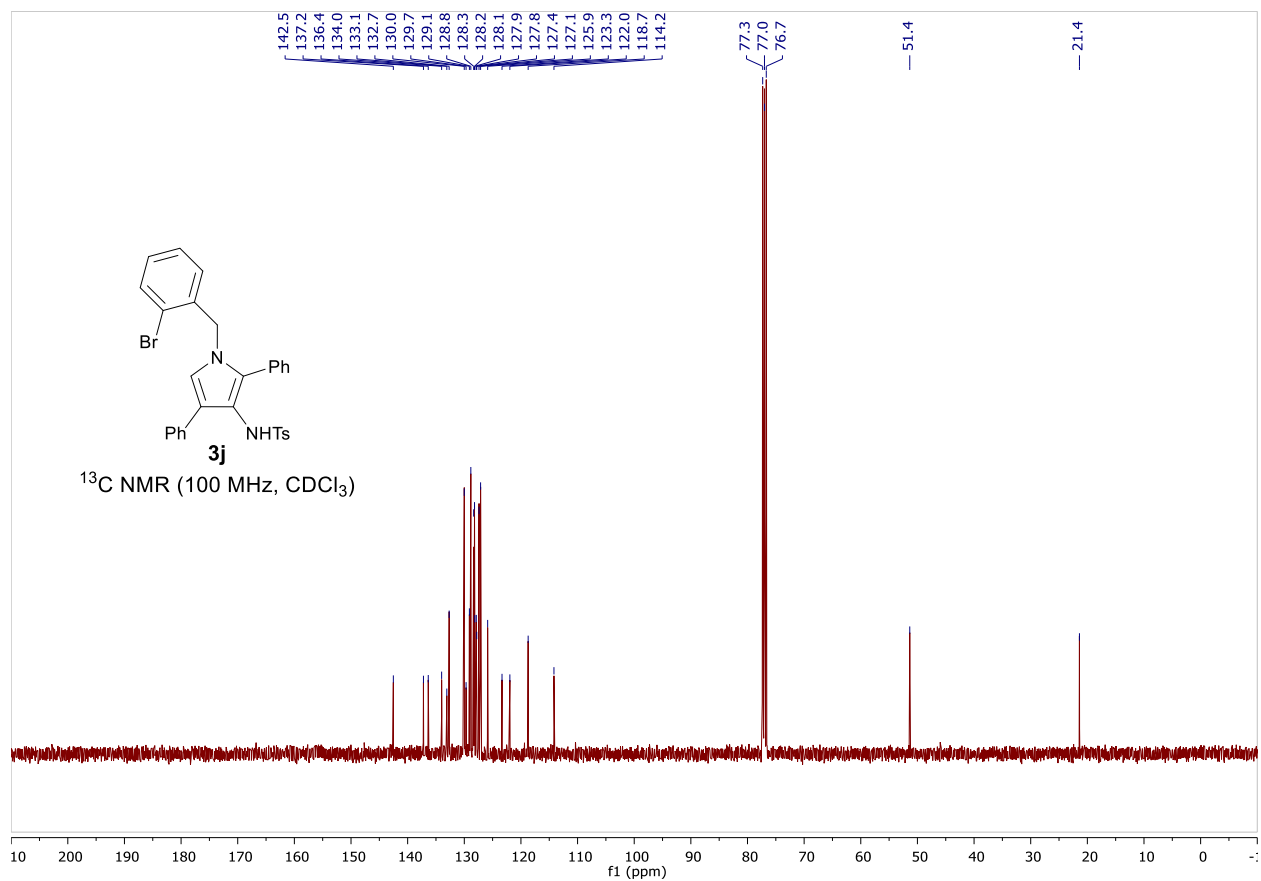

$^1\text{H}$  and  $^{13}\text{C}$  NMR spectra of compound **3k**

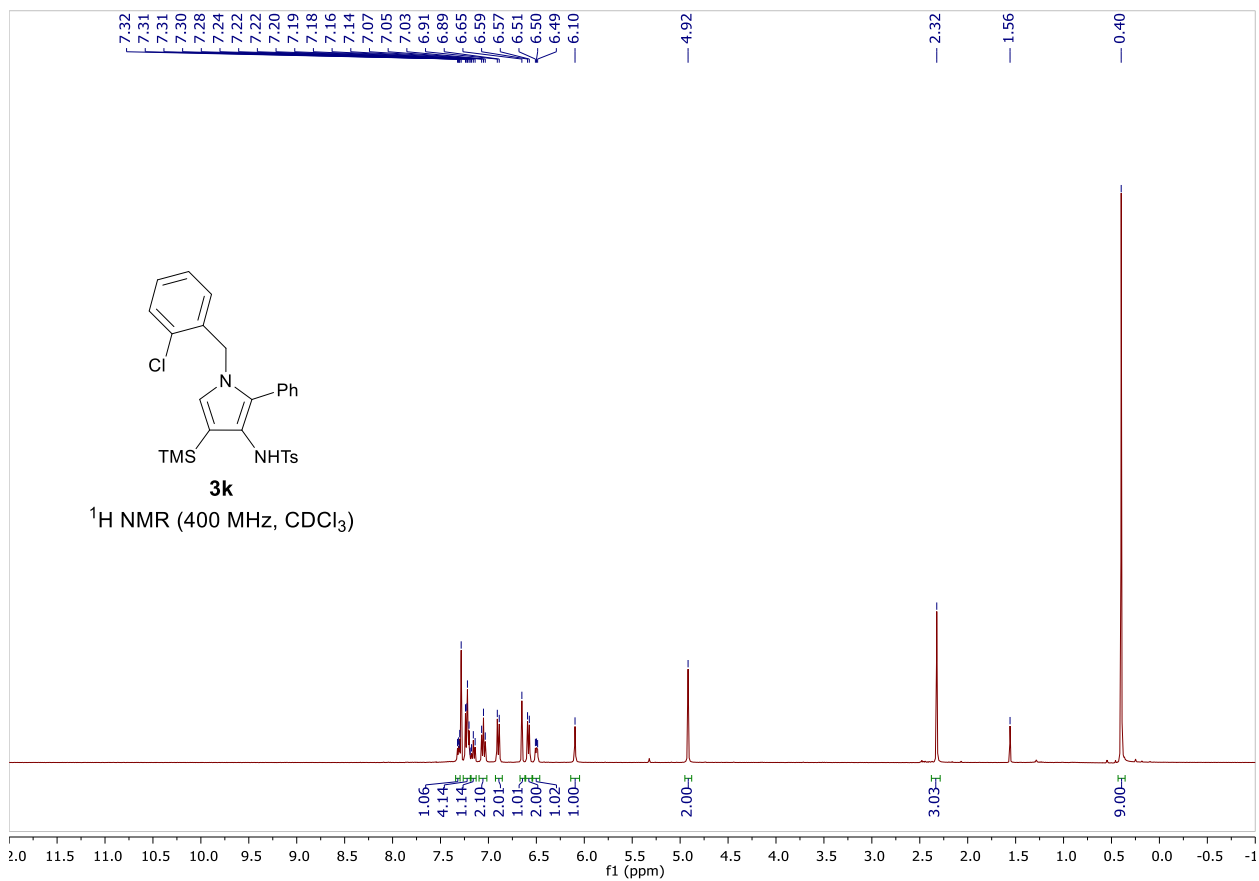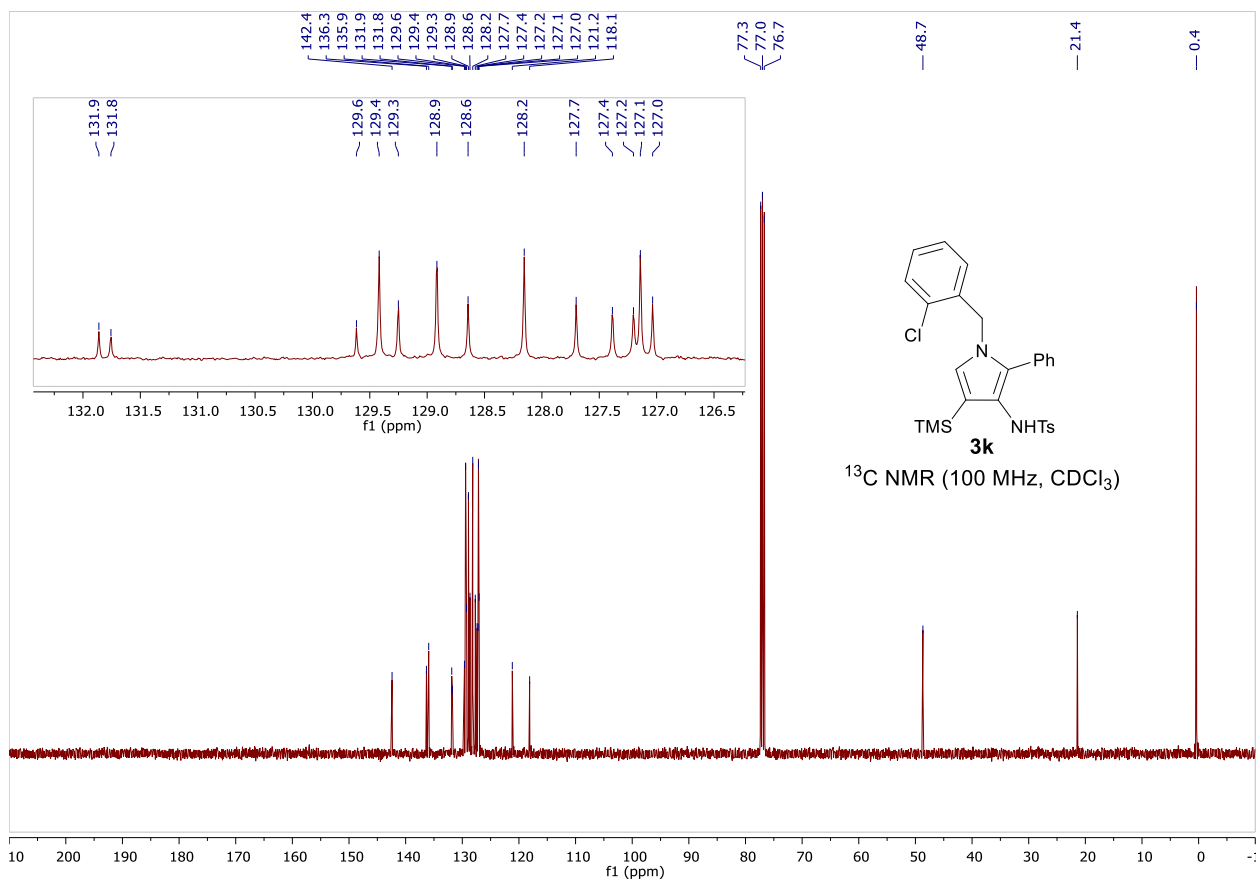

$^1\text{H}$  and  $^{13}\text{C}$  NMR spectra of compound **3I**

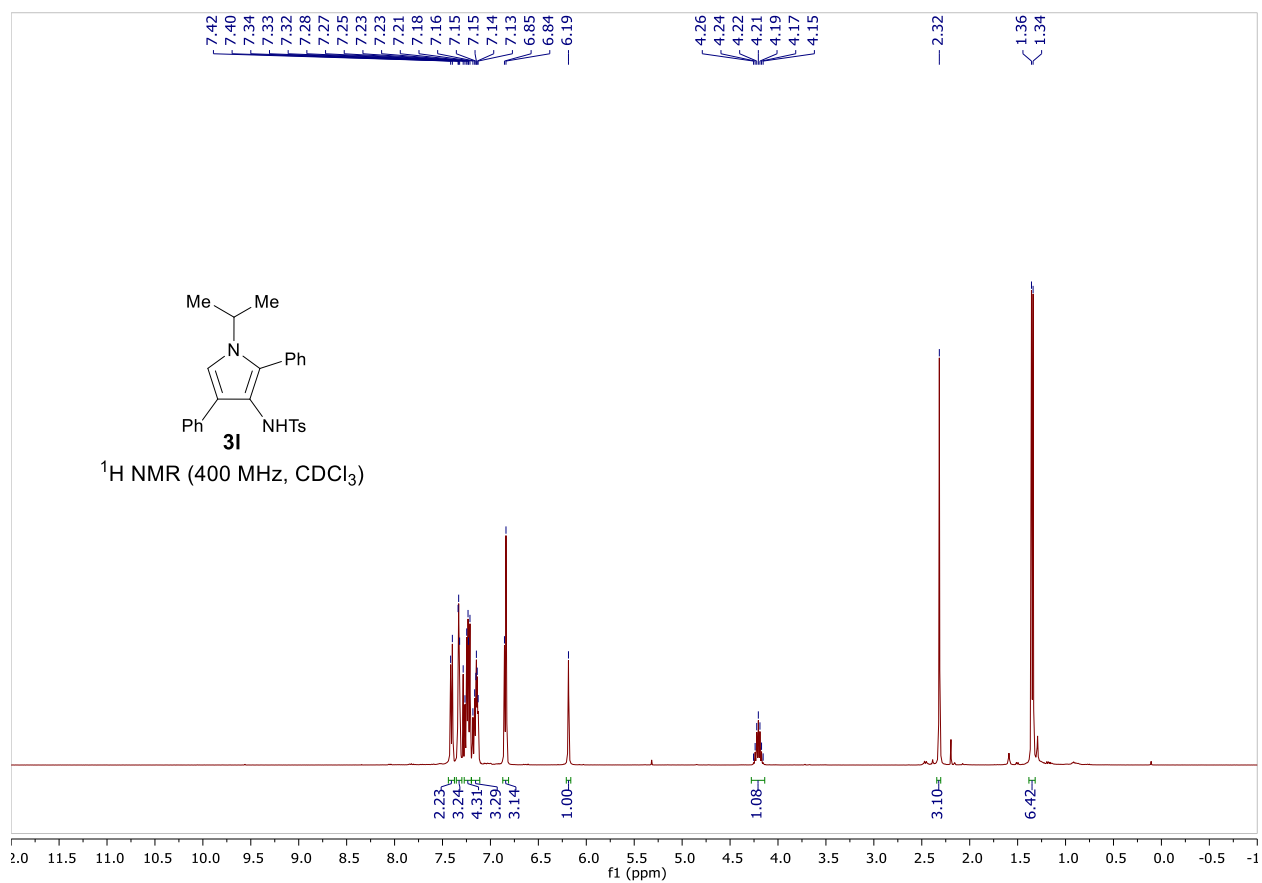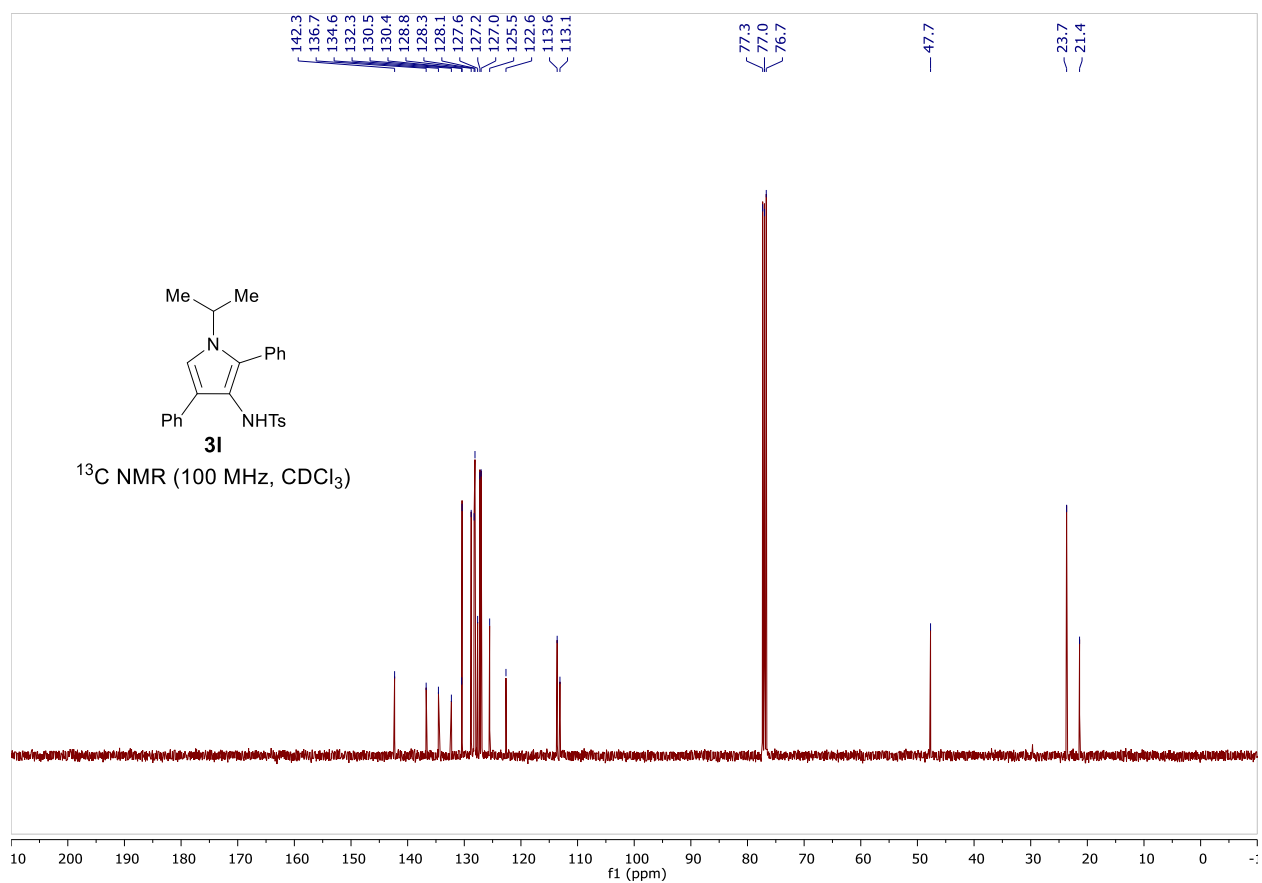

$^1\text{H}$  and  $^{13}\text{C}$  NMR spectra of compound **3m**

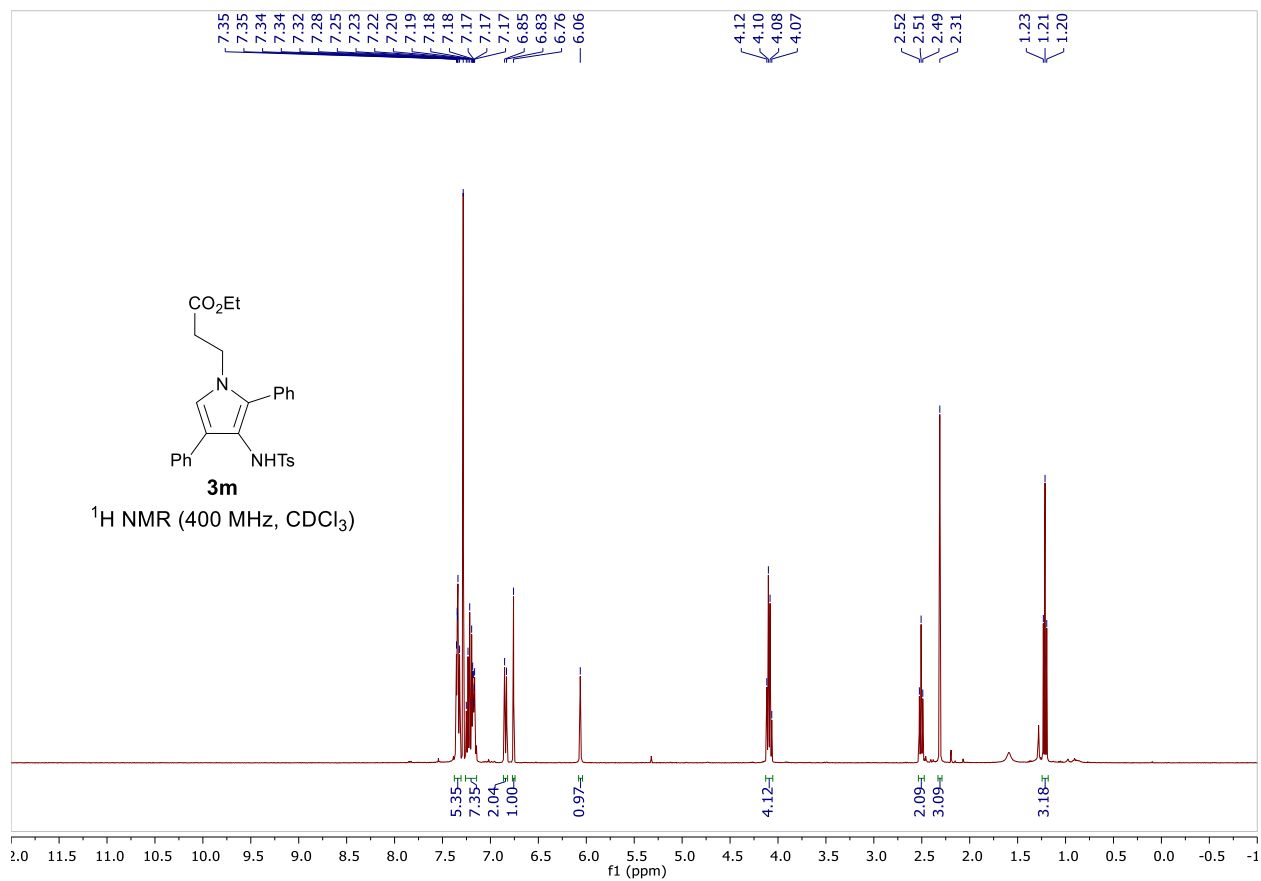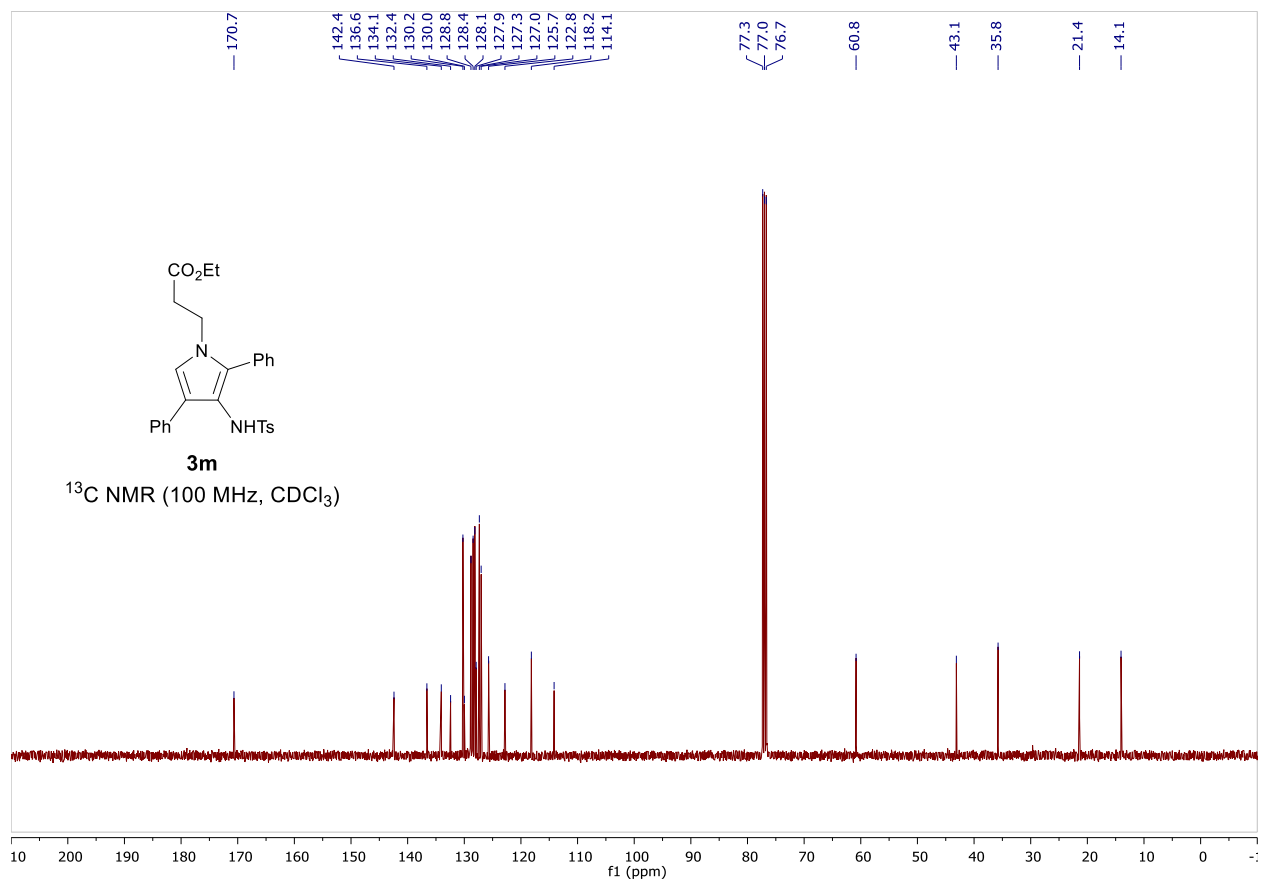

# $^1\text{H}$ and $^{13}\text{C}$ NMR spectra of compound **3n**

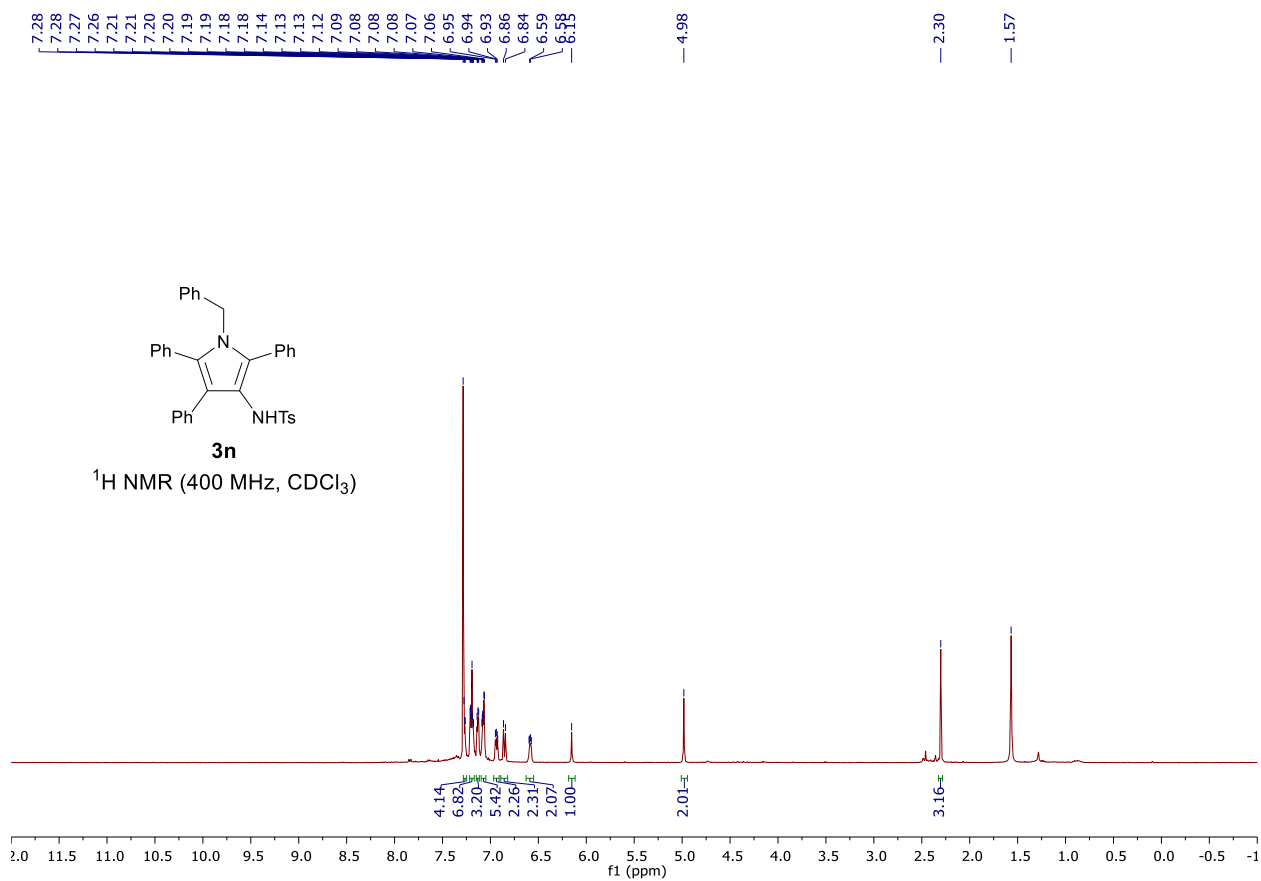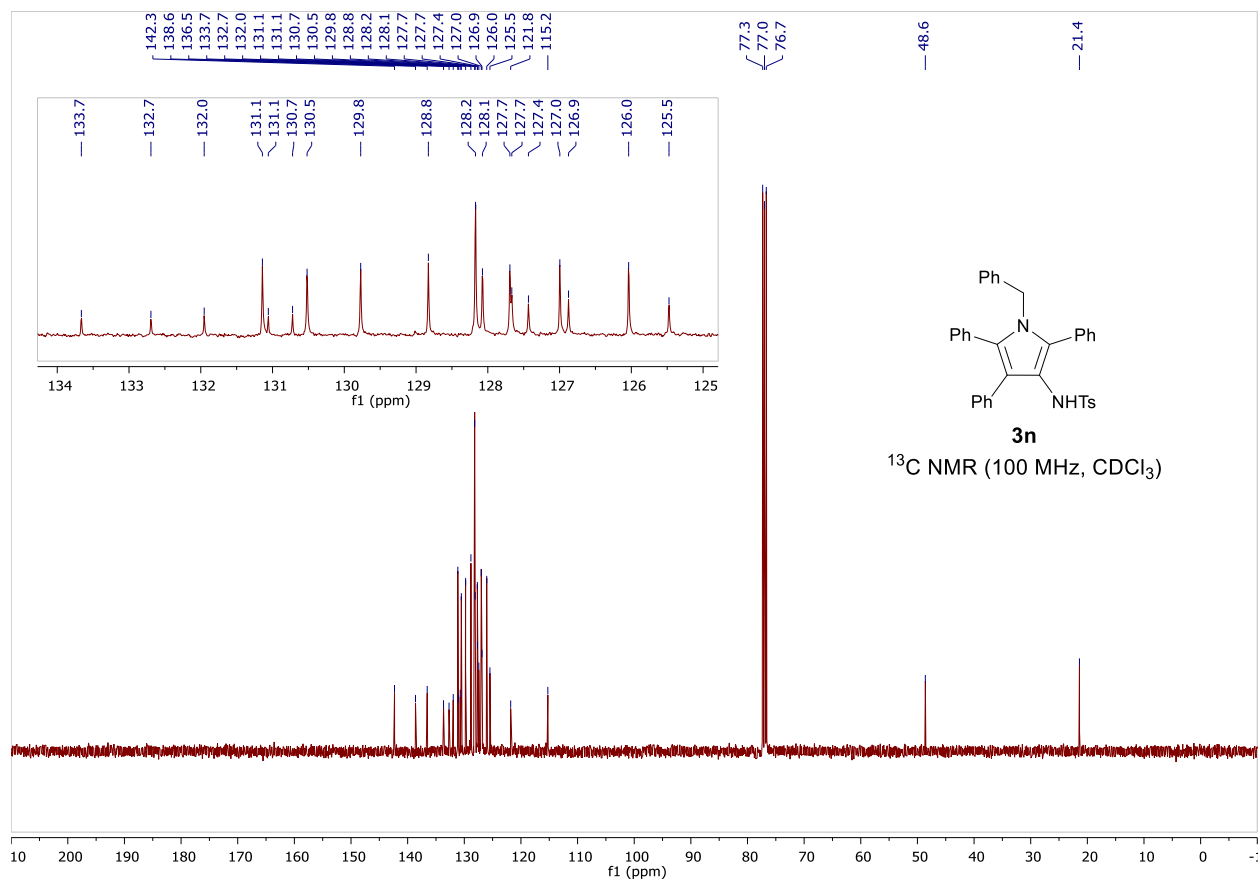

# $^1\text{H}$ and $^{13}\text{C}$ NMR spectra of compound **3o**

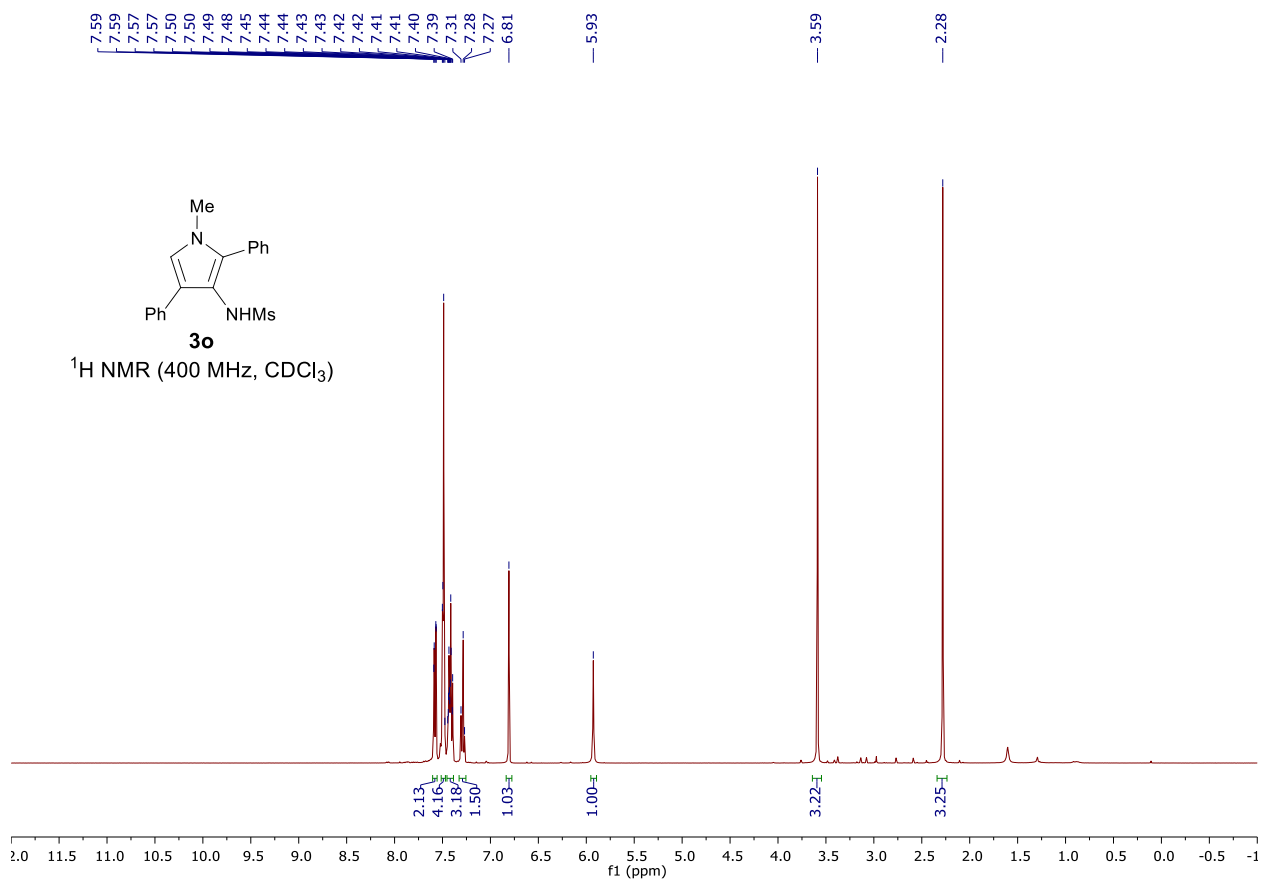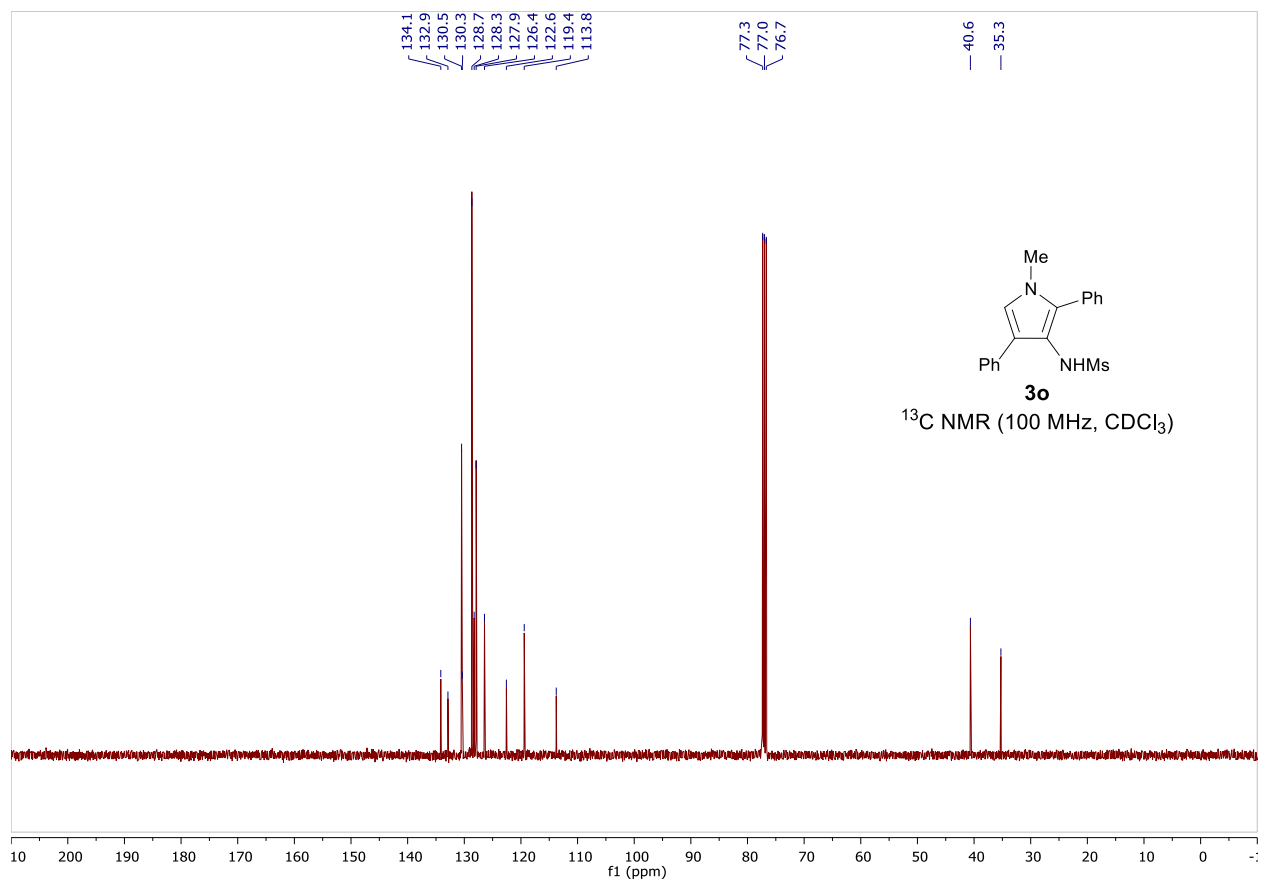



$^1\text{H}$  and  $^{13}\text{C}$  NMR spectra of compound **3p**

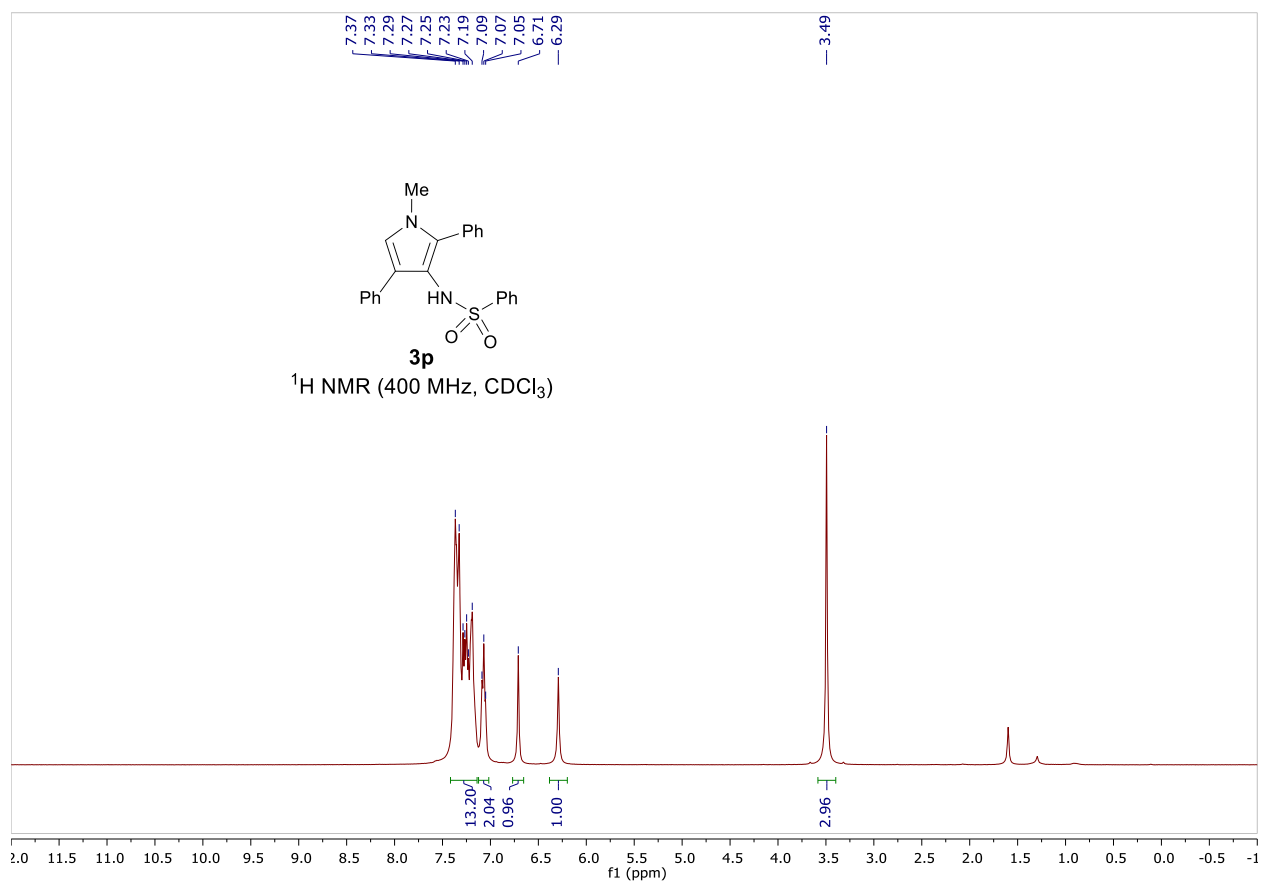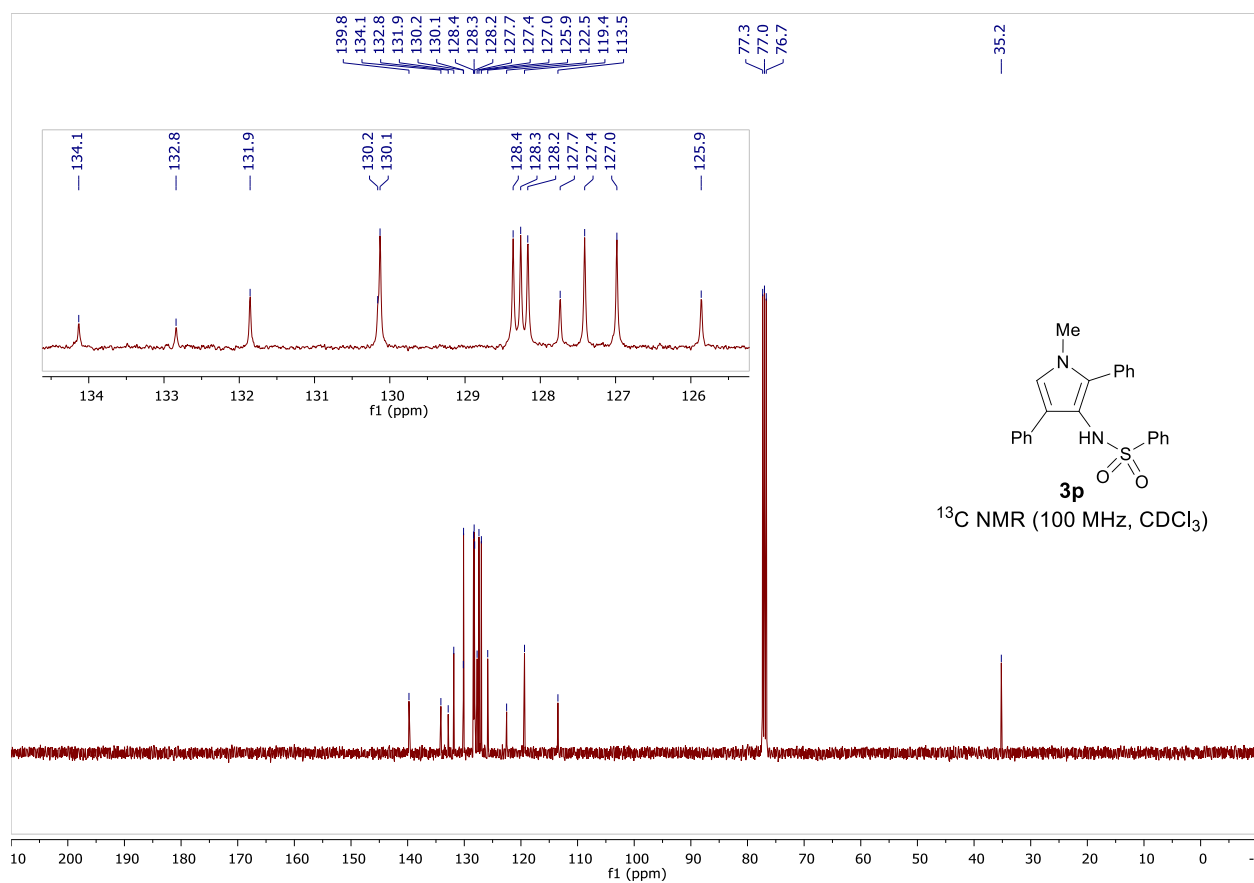

$^1\text{H}$  and  $^{13}\text{C}$  NMR spectra of compound **3q**

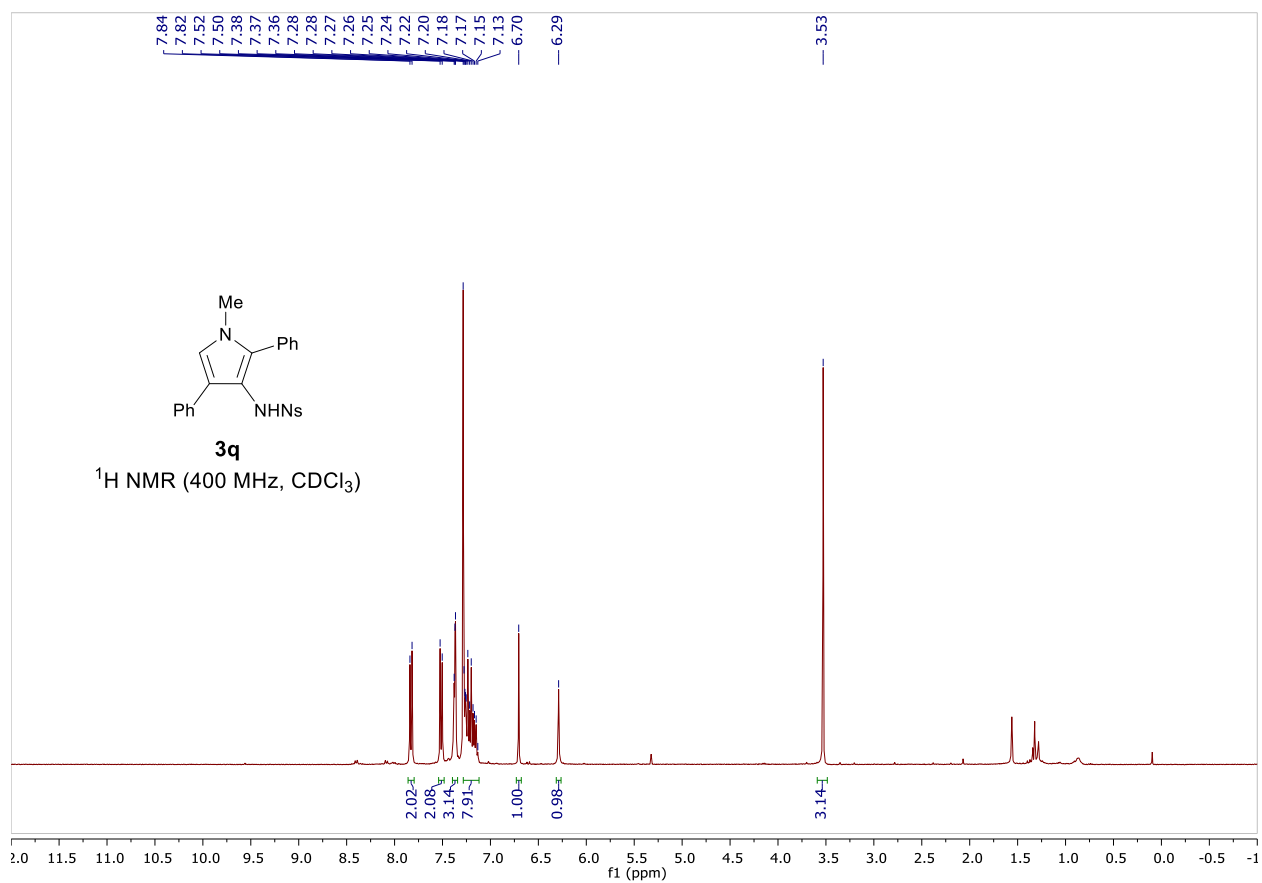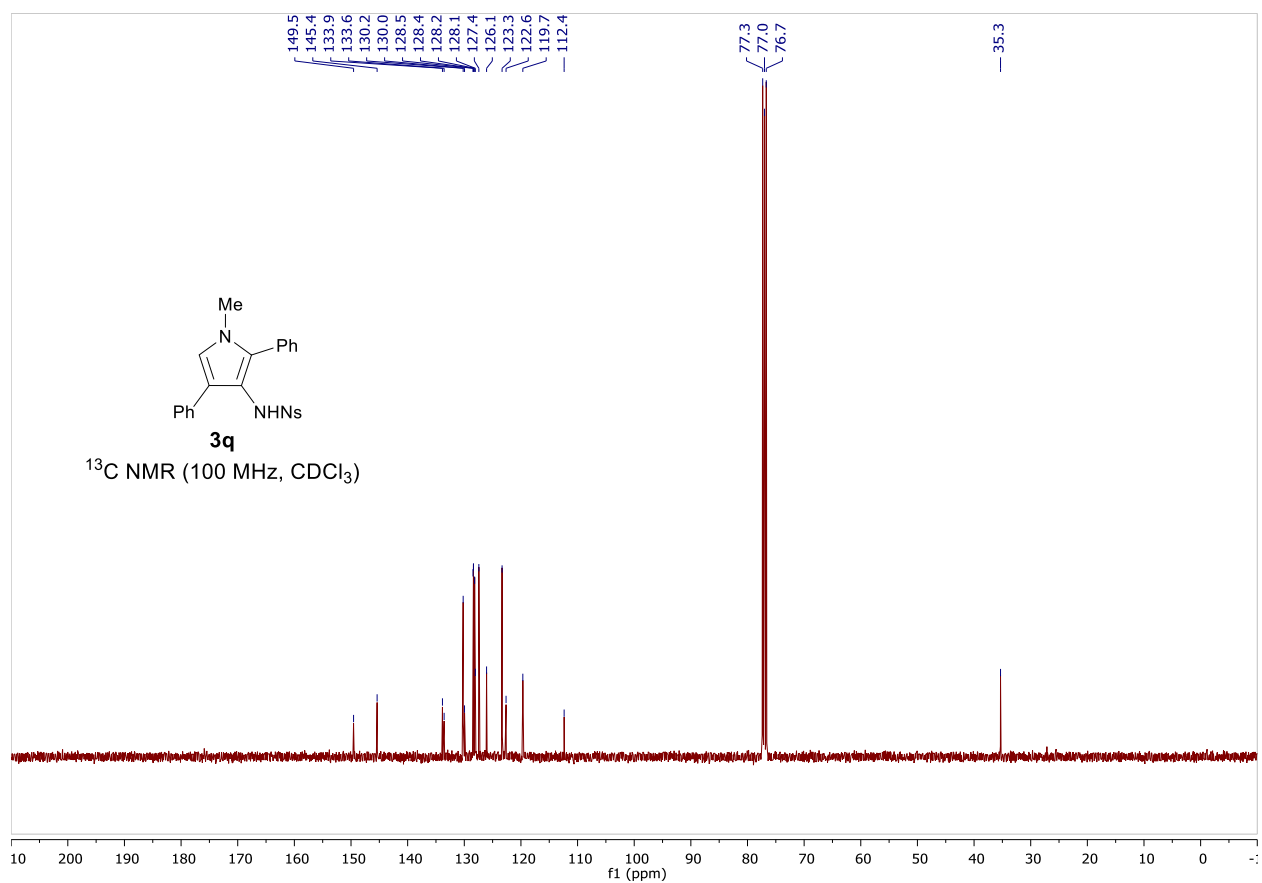

$^1\text{H}$  and  $^{13}\text{C}$  NMR spectra of compound **3r**

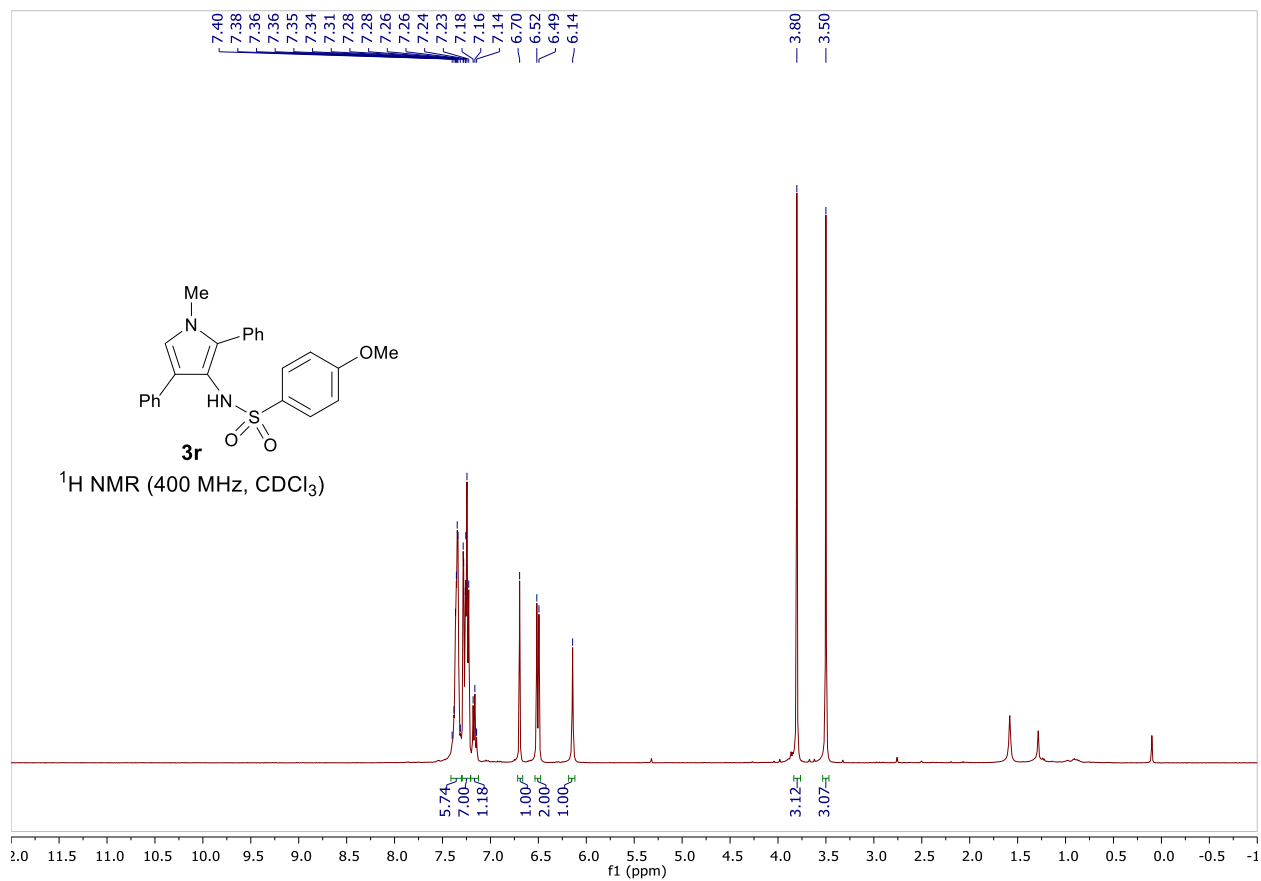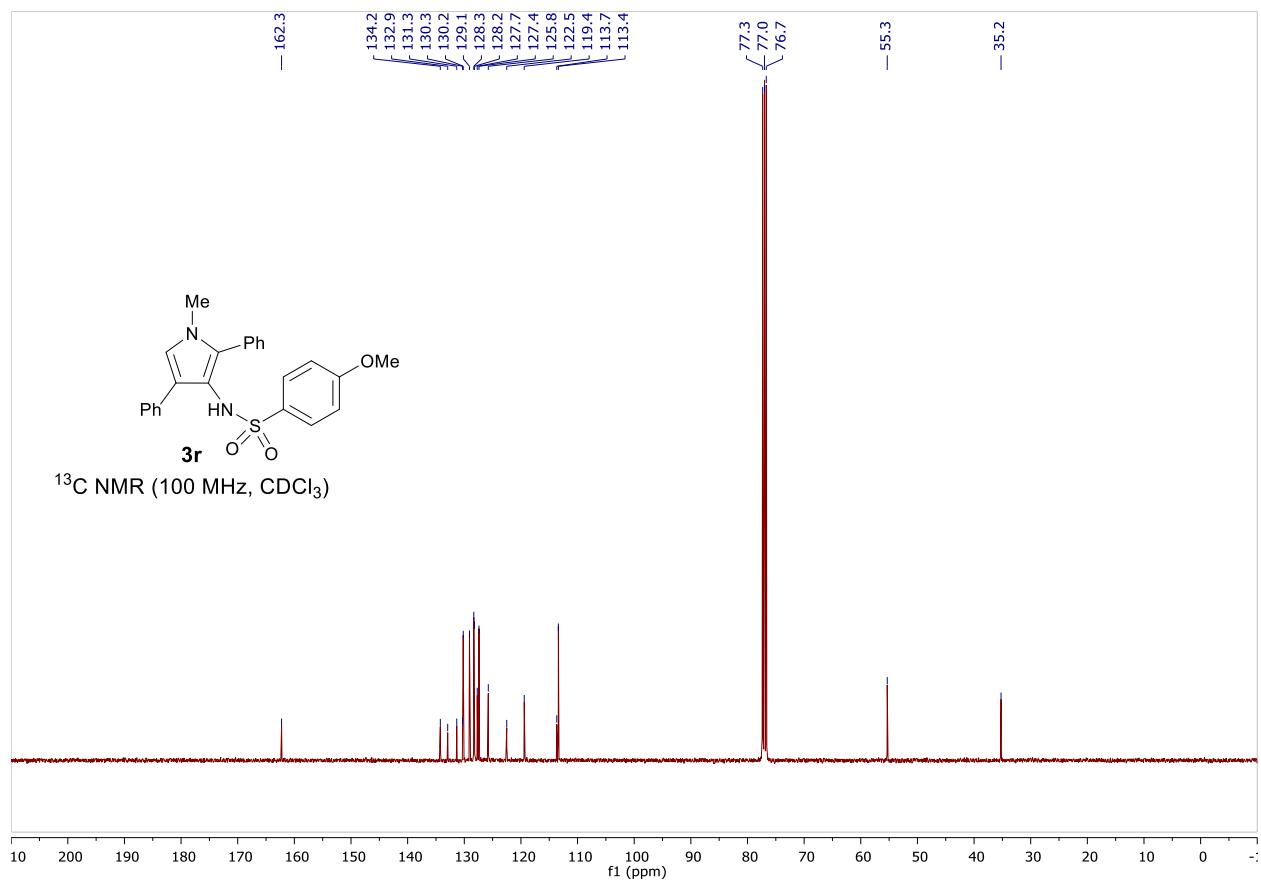

$^1\text{H}$  and  $^{13}\text{C}$  NMR spectra of compound **3s**

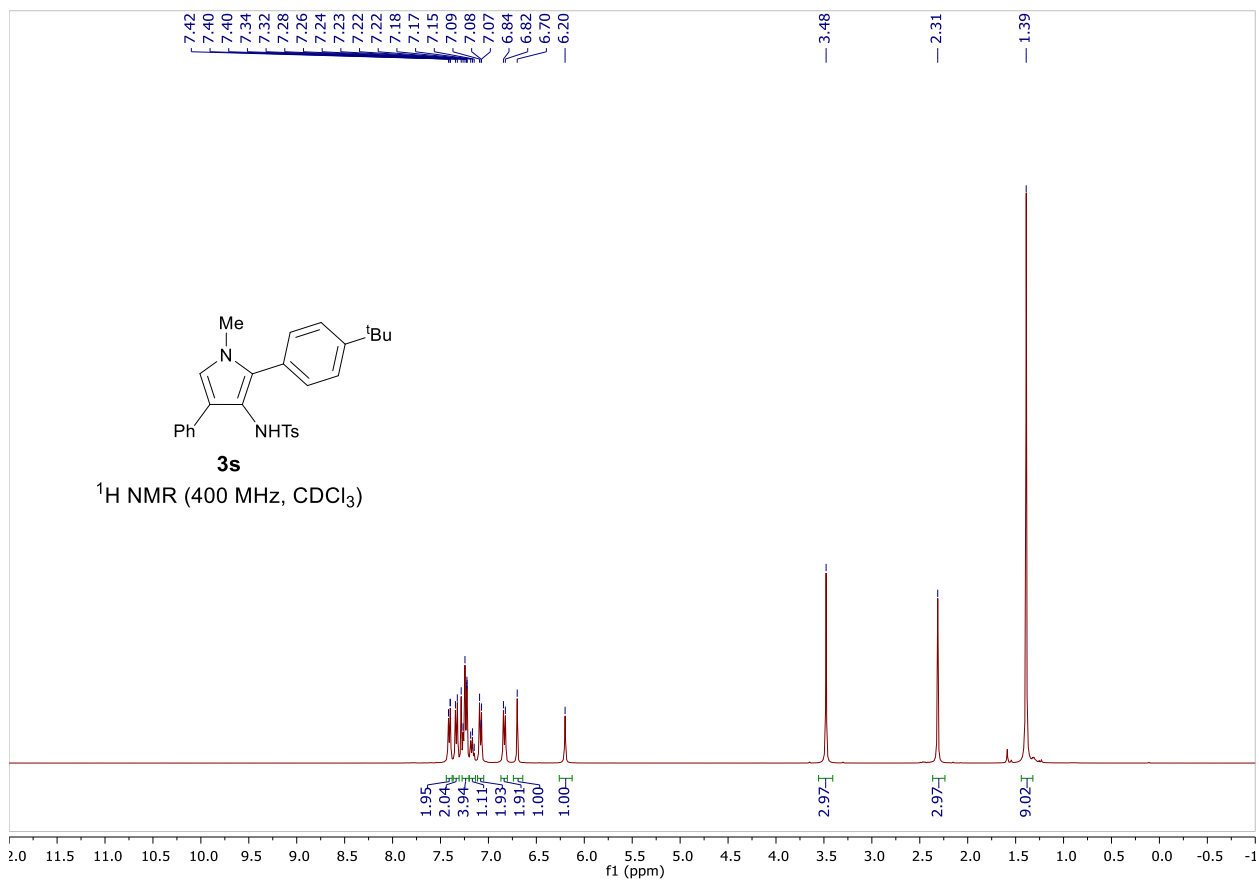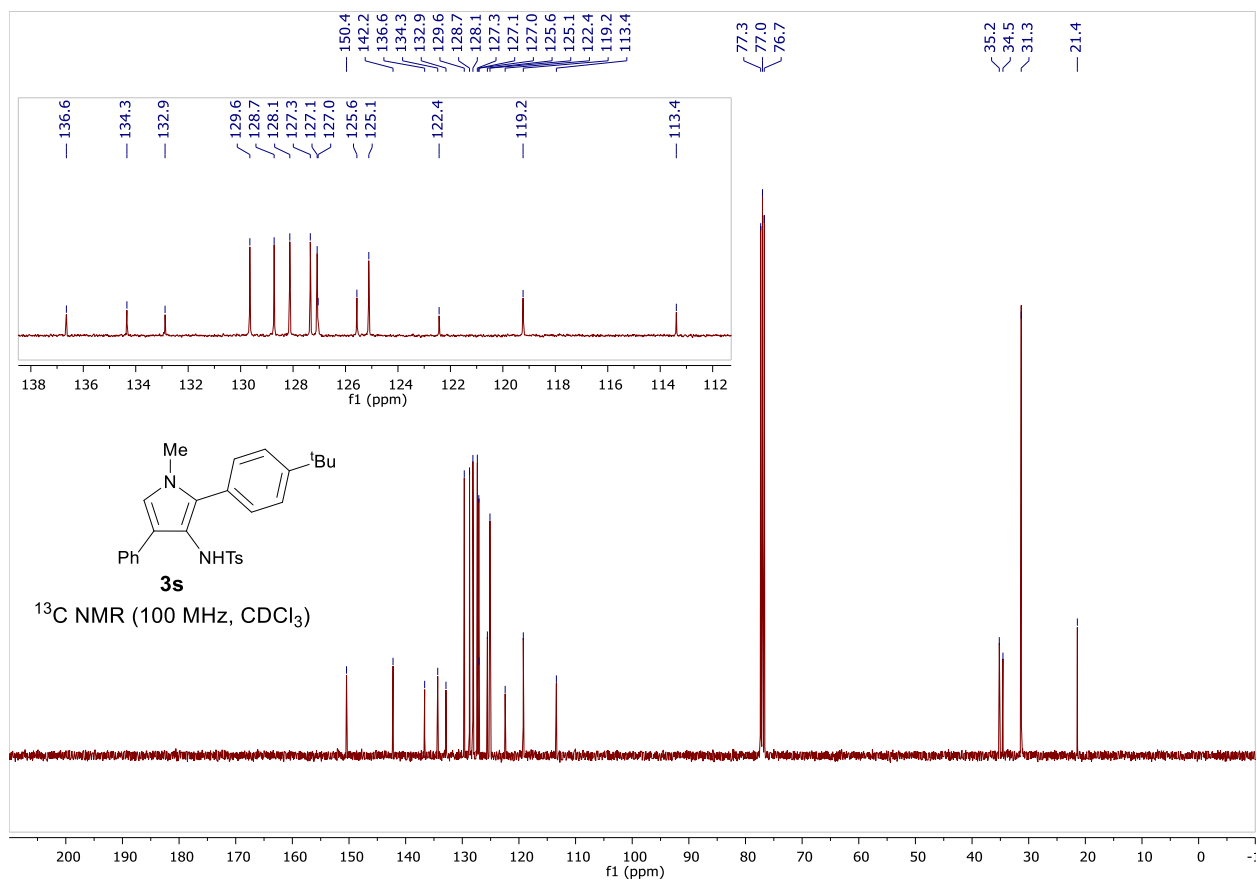

$^1\text{H}$  and  $^{13}\text{C}$  NMR spectra of compound **3t**

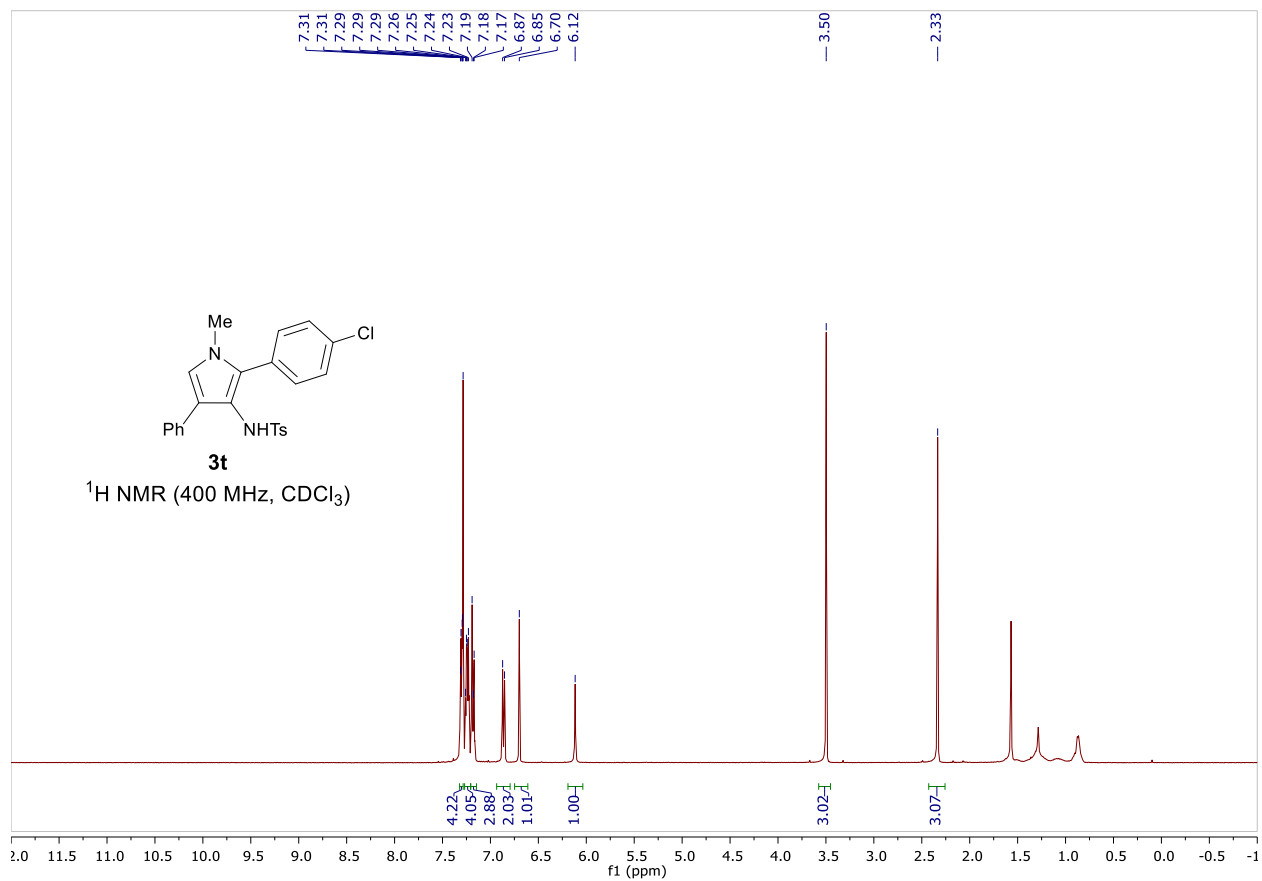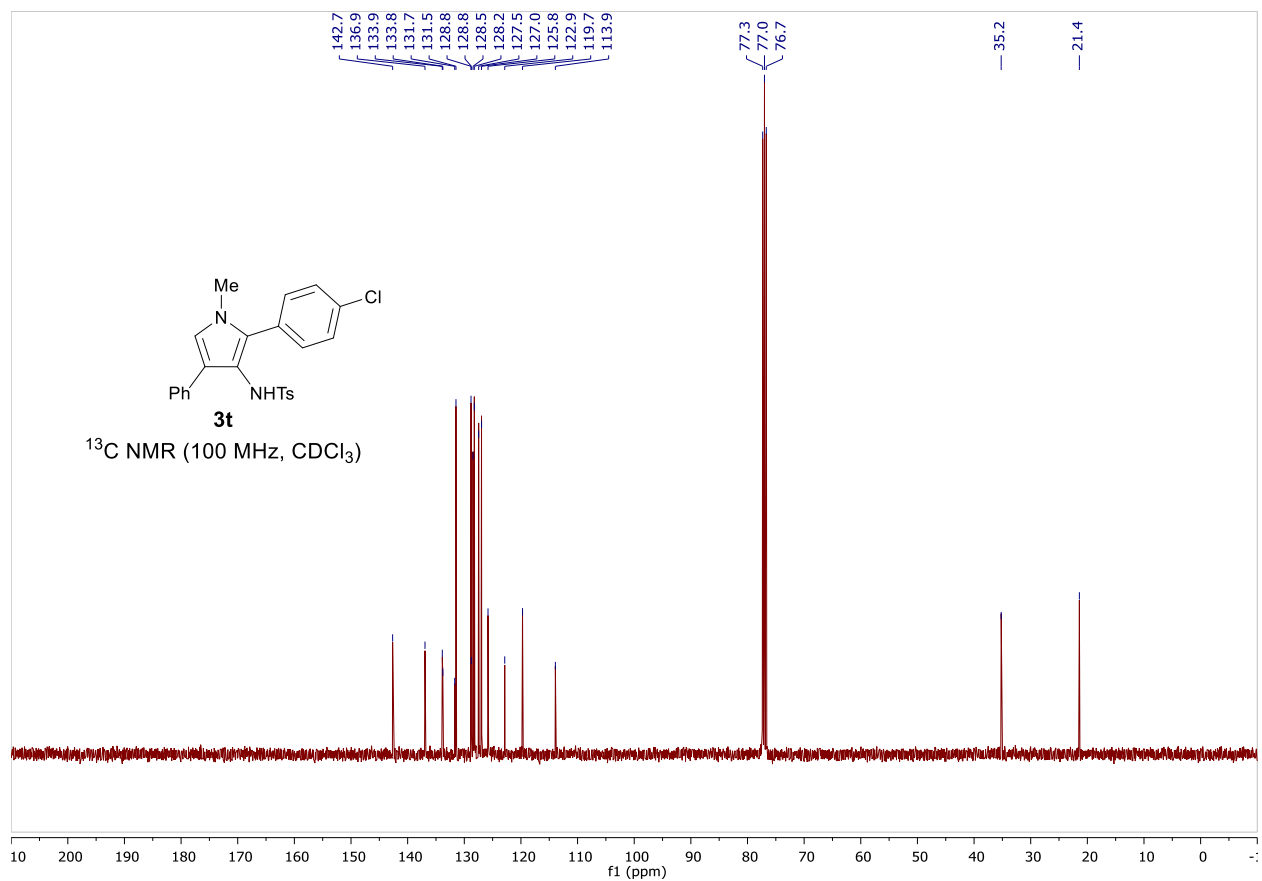

$^1\text{H}$  and  $^{13}\text{C}$  NMR spectra of compound **3u**

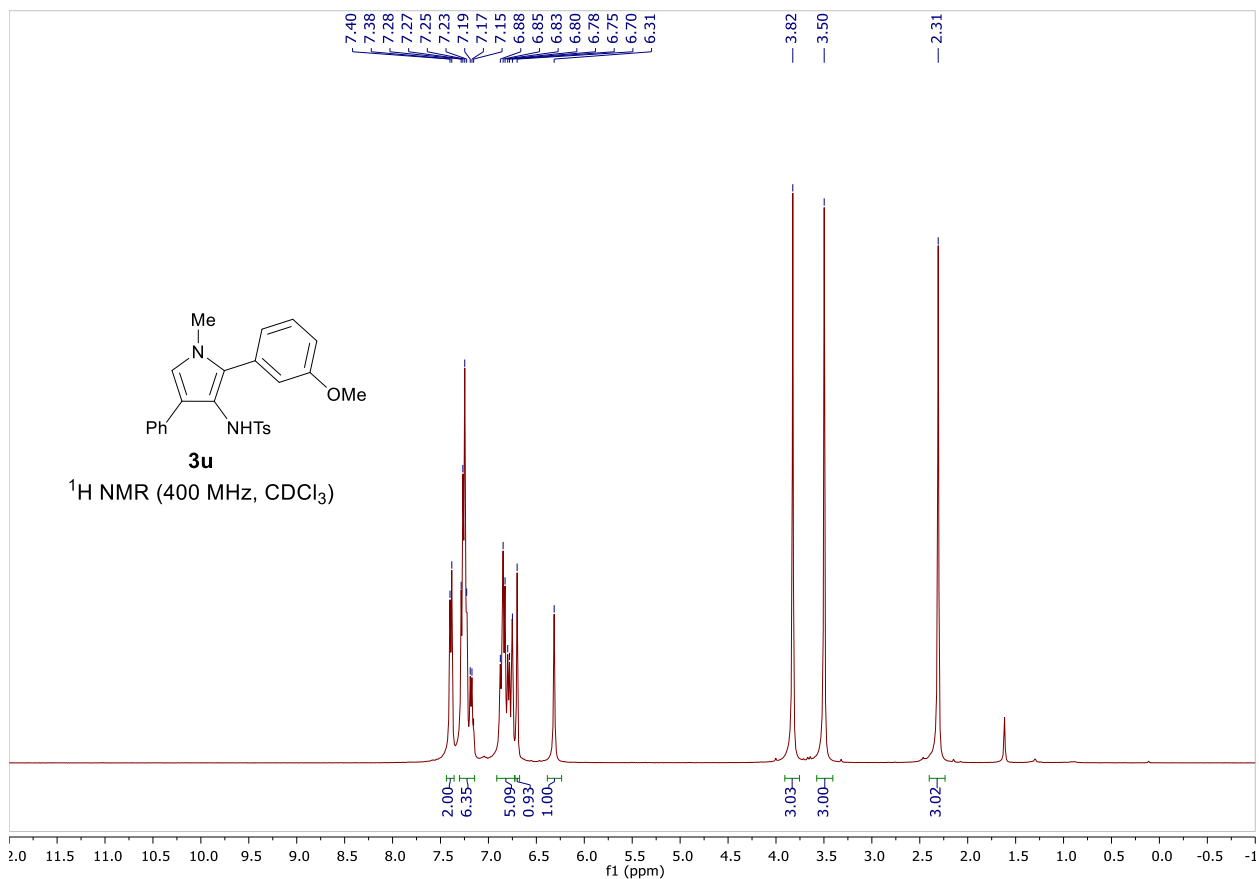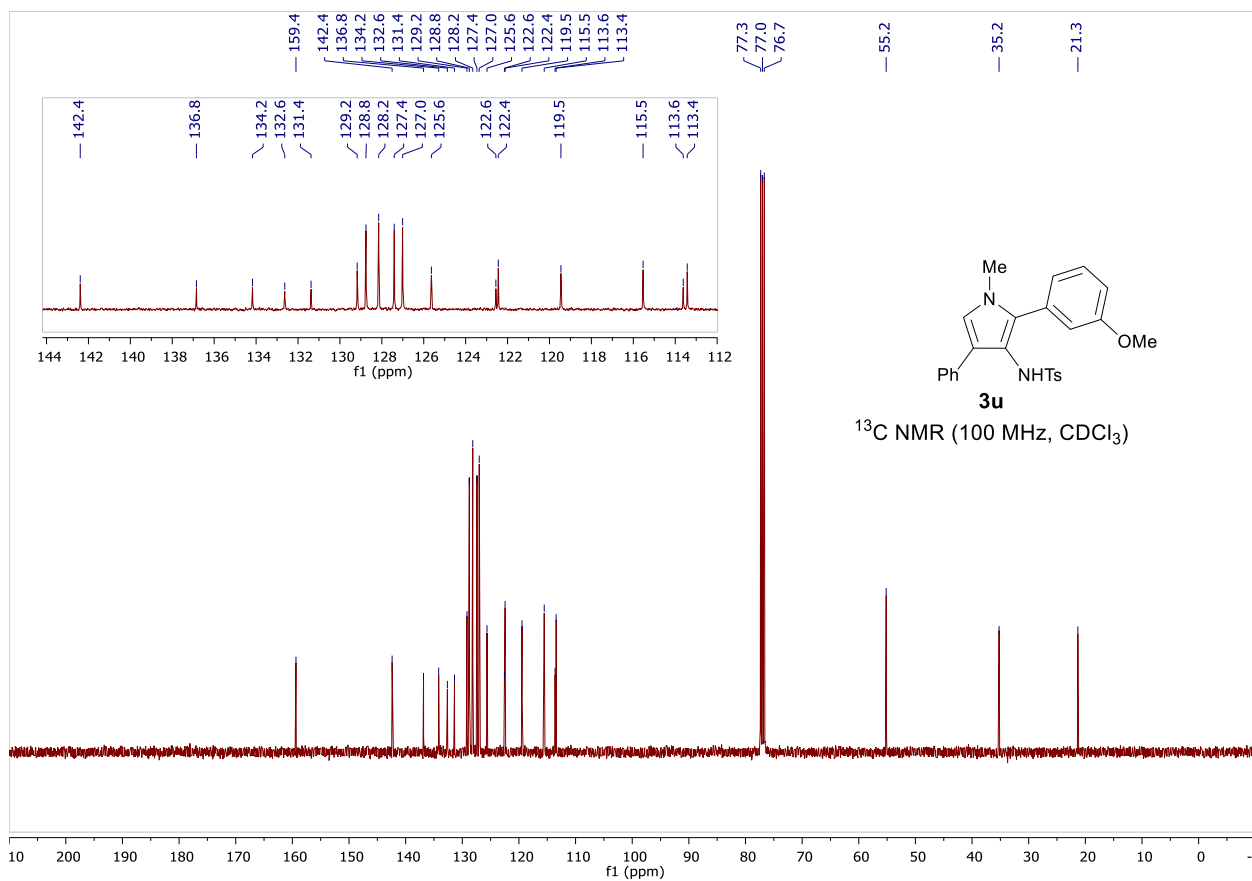

# $^1\text{H}$ and $^{13}\text{C}$ NMR spectra of compound **20a**

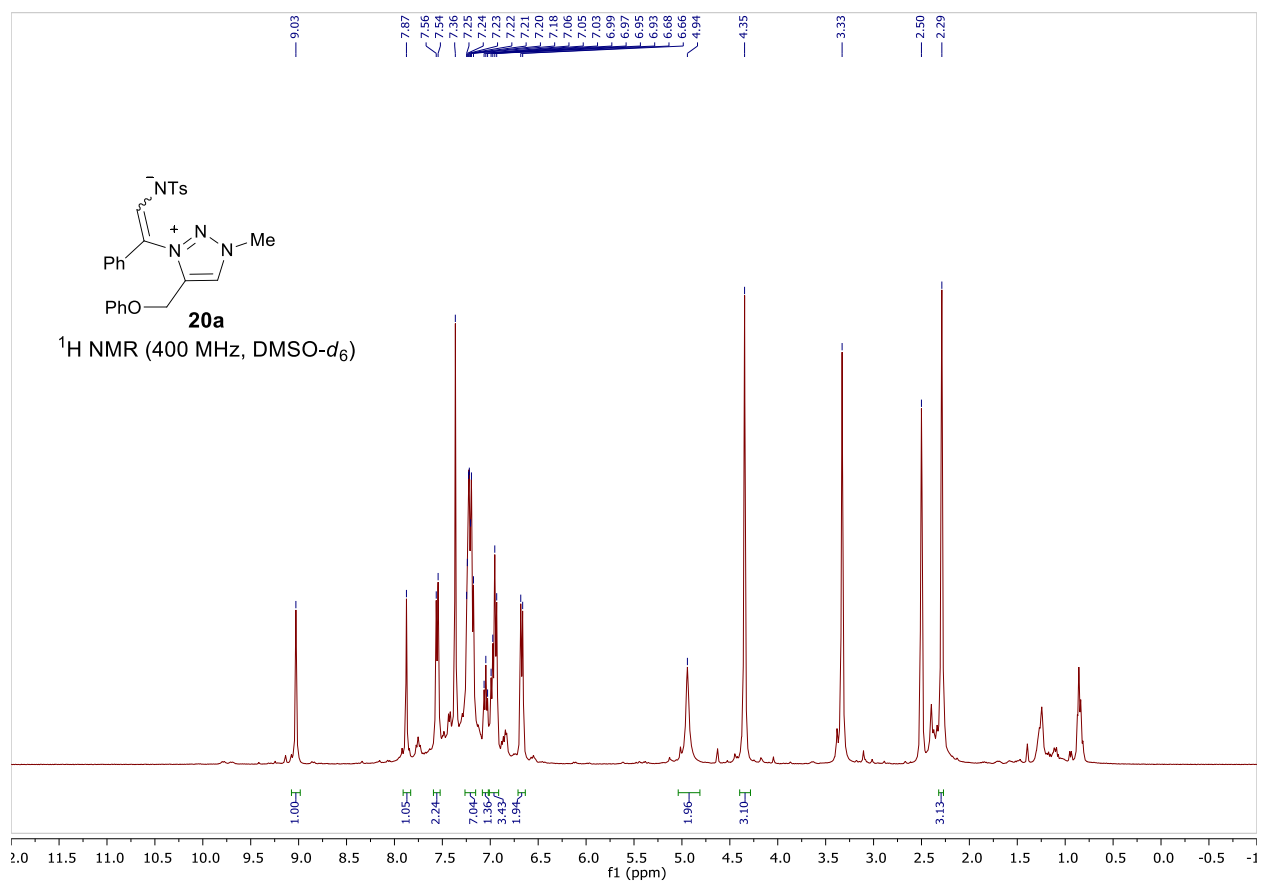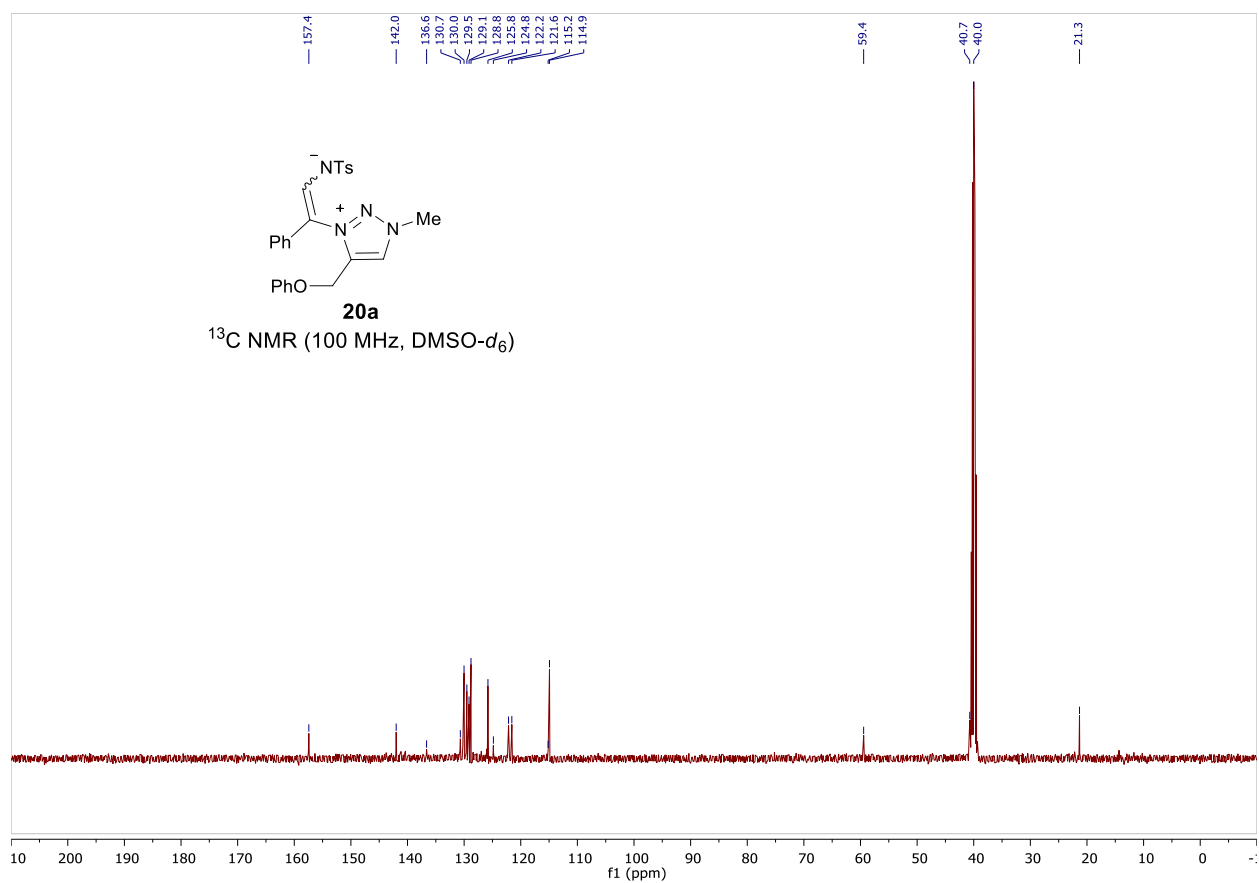

# $^1\text{H}$ and $^{13}\text{C}$ NMR spectra of compound **20b**

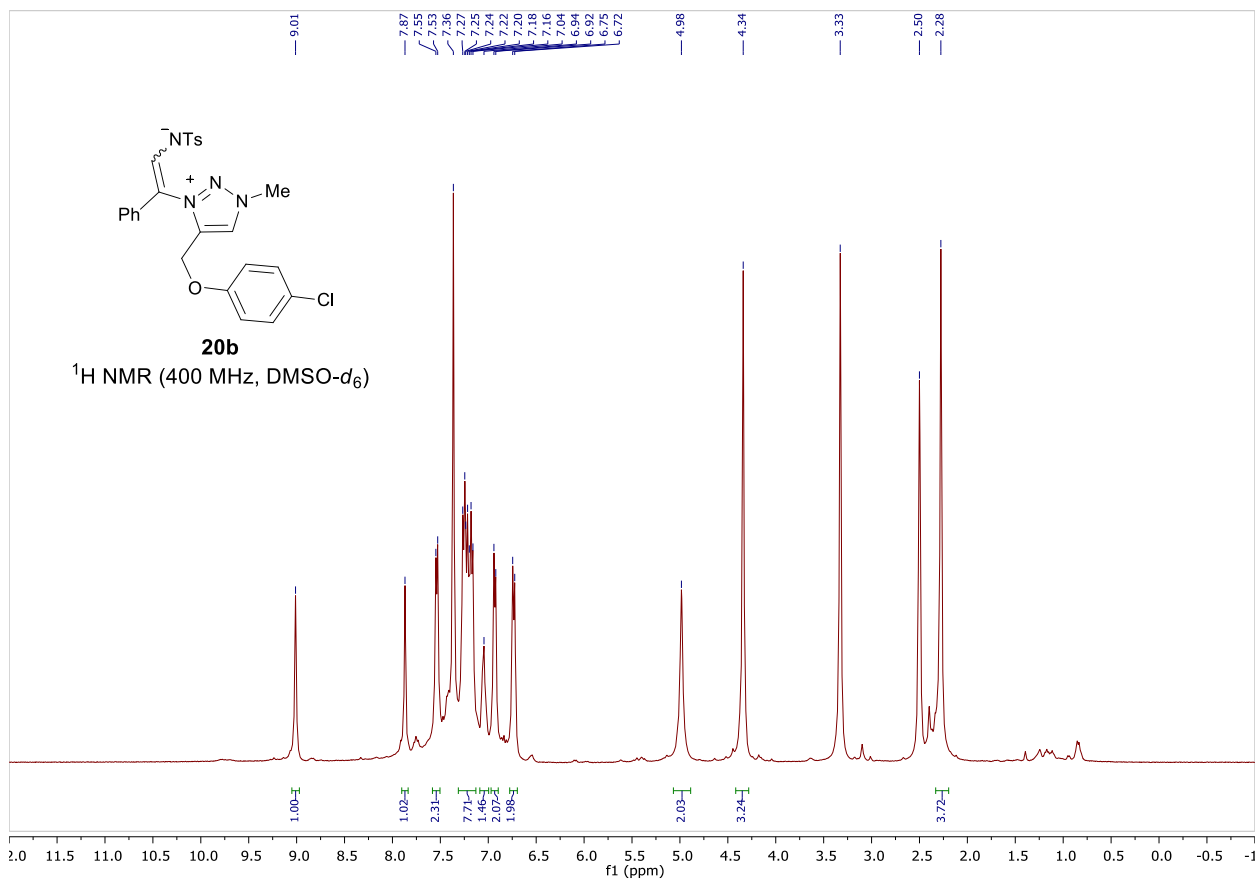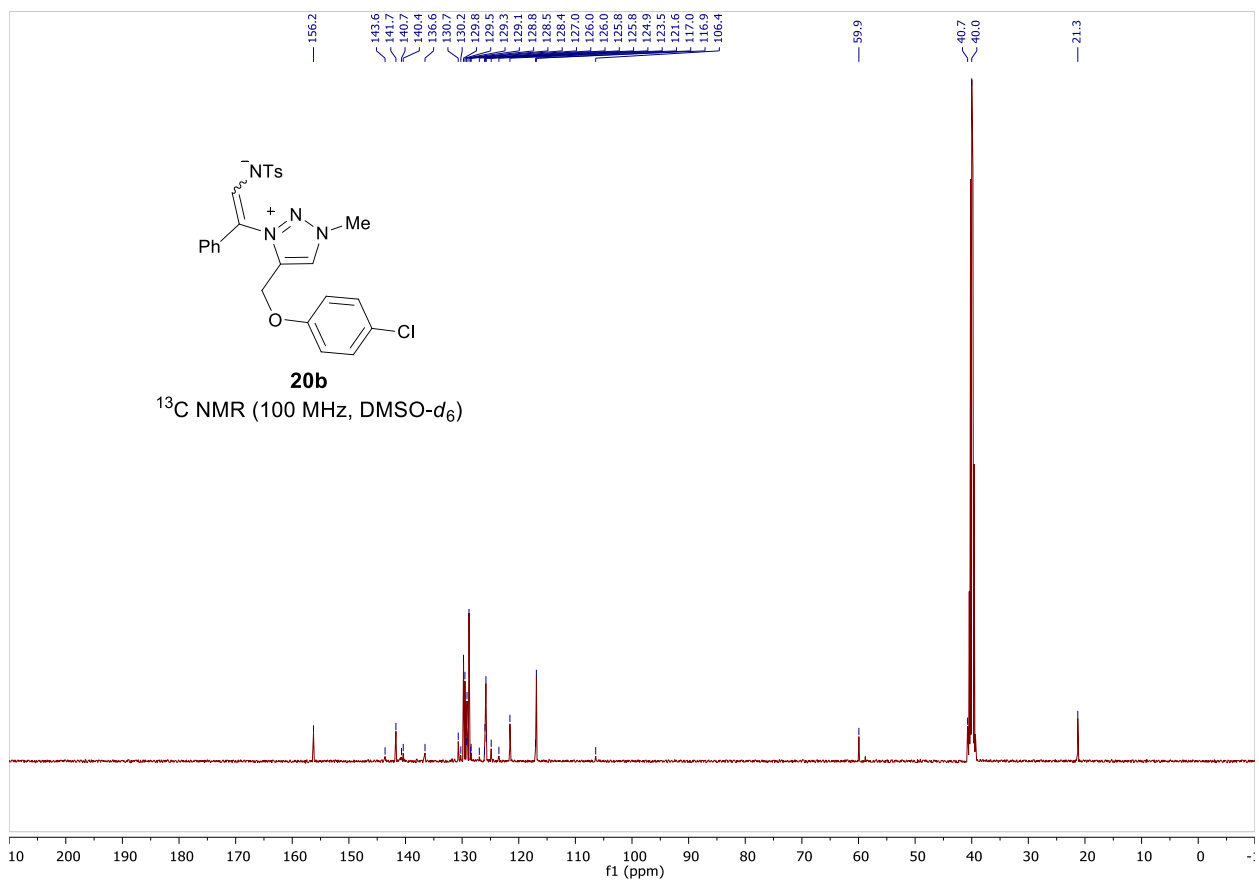



$^1\text{H}$  and  $^{13}\text{C}$  NMR spectra of compound **20b** at 100 °C

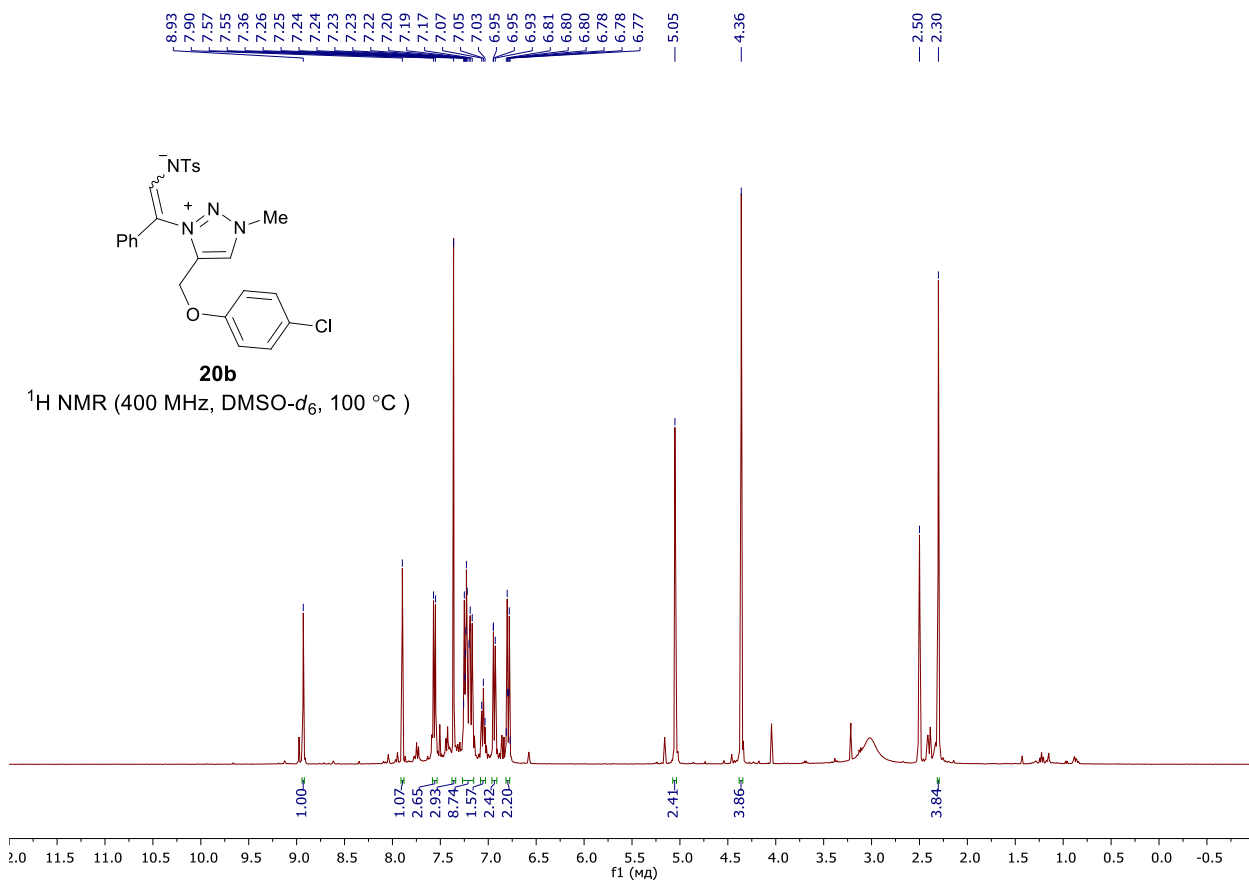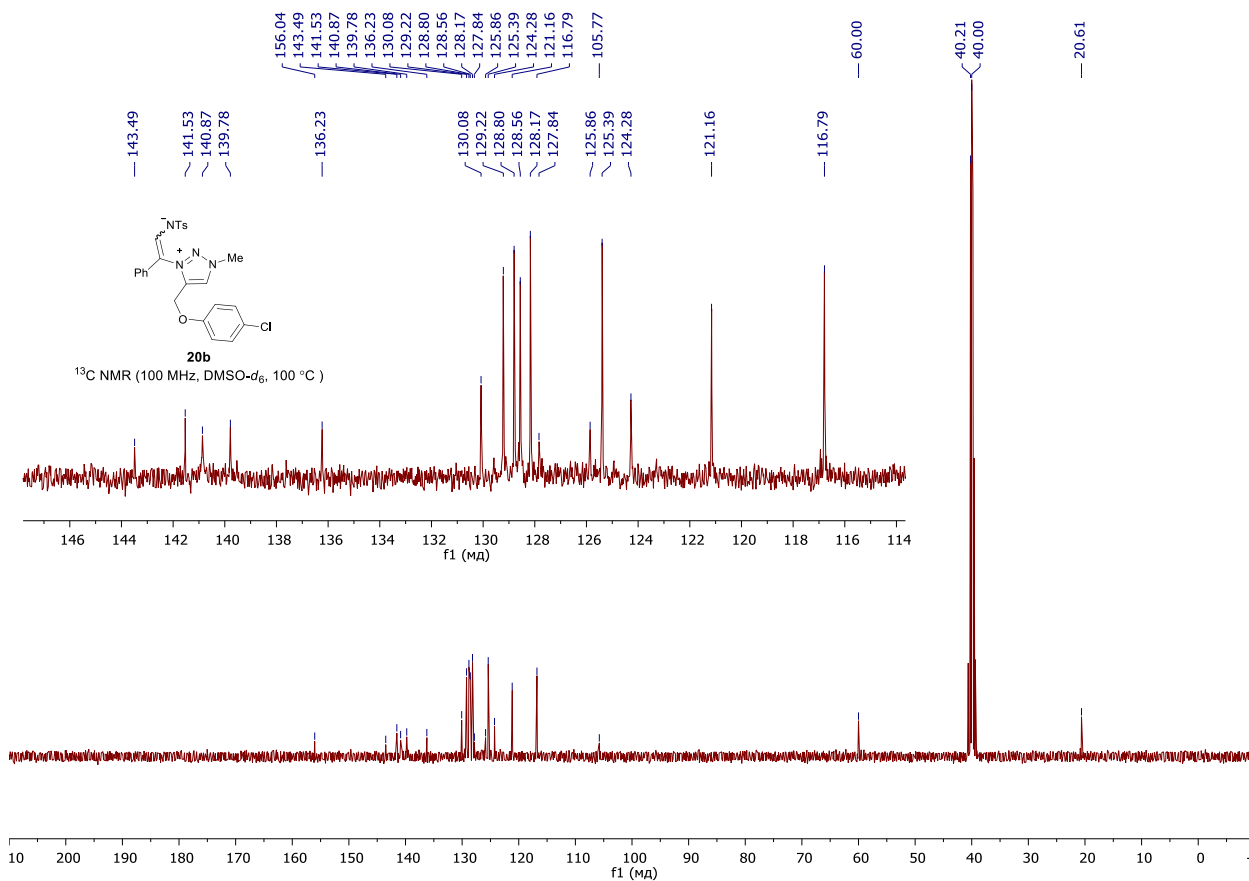

## 2D NMR spectra of compound **20b**

$^1\text{H}$ - $^{13}\text{C}$  HMBC spectrum

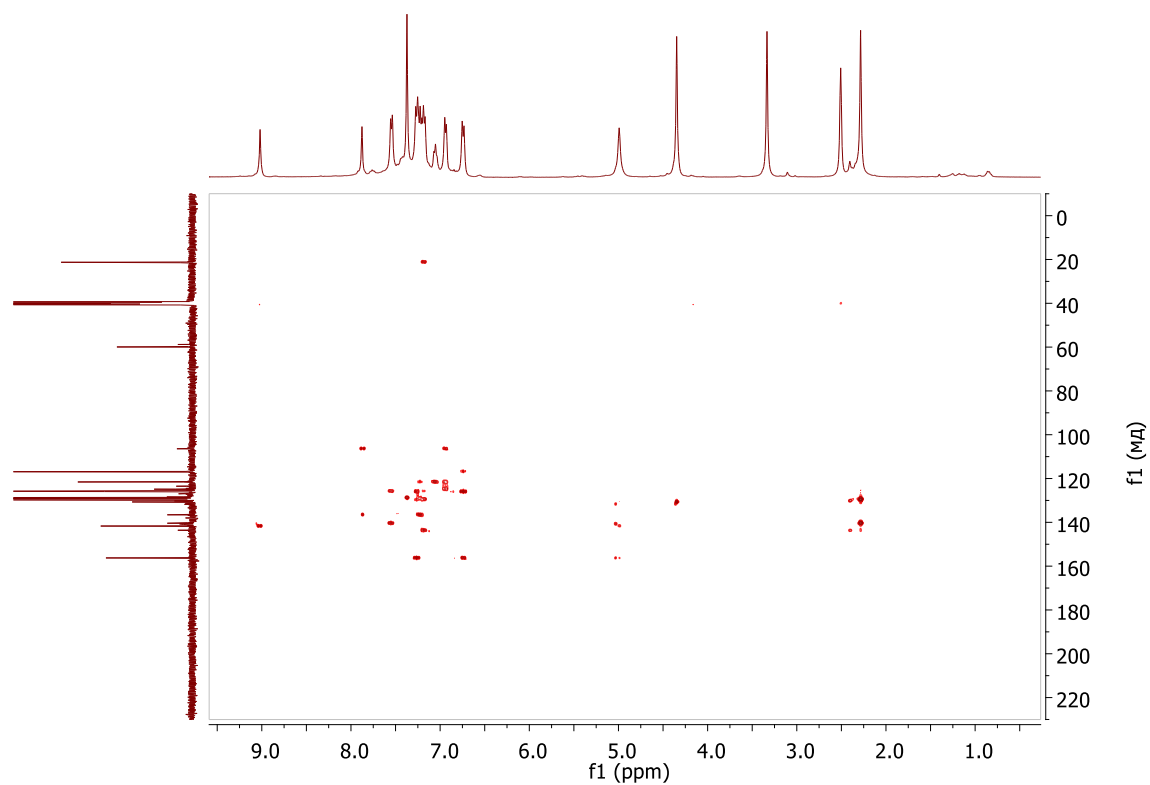

Key cross-peaks in  $^1\text{H}$ - $^{13}\text{C}$  HMBC spectrum

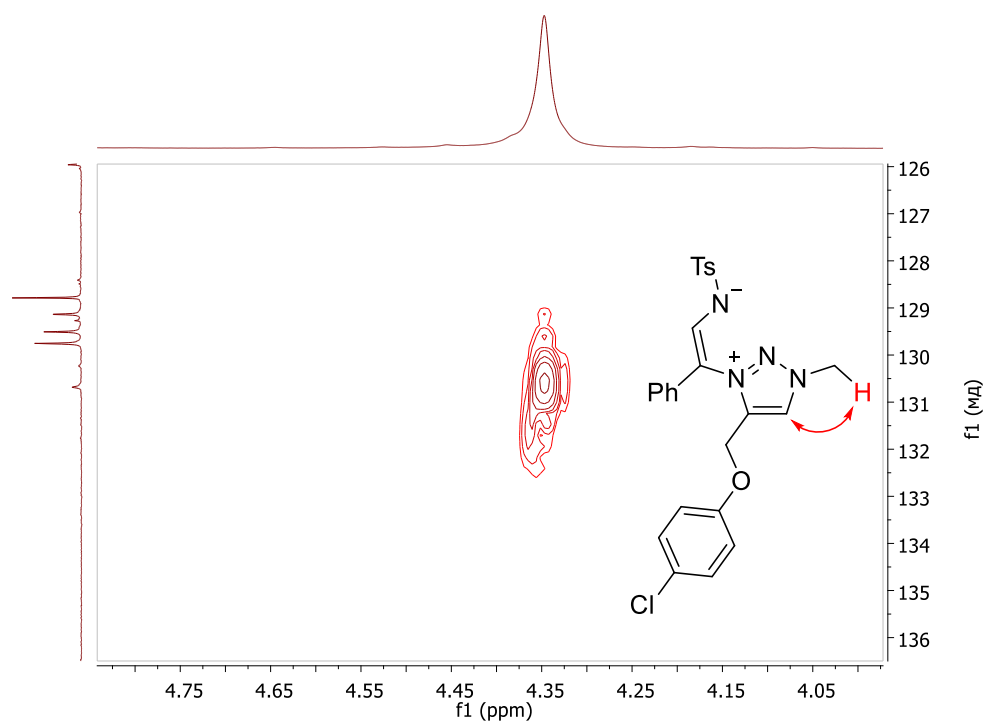

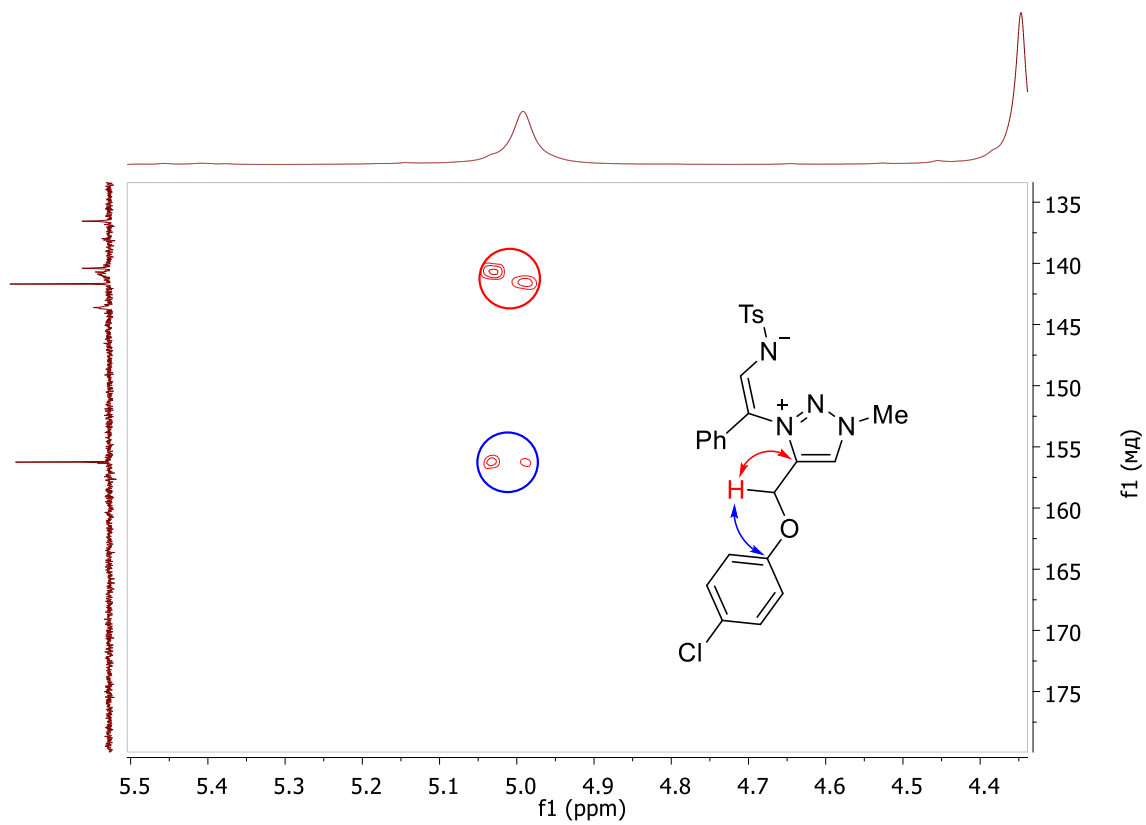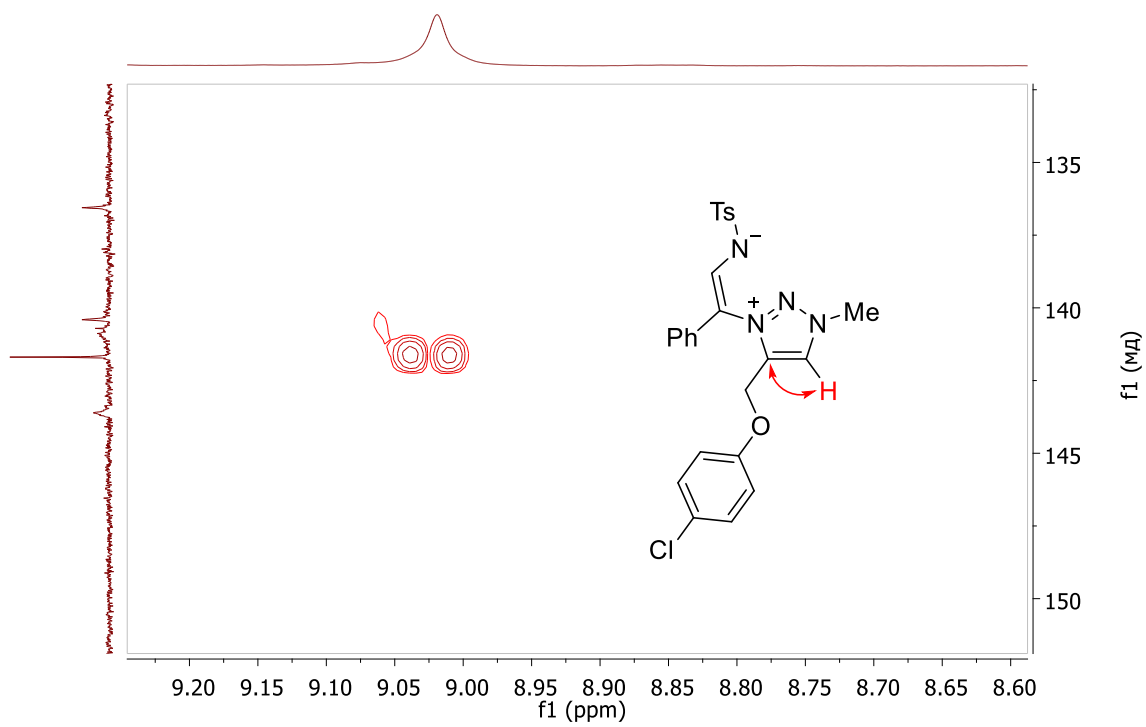

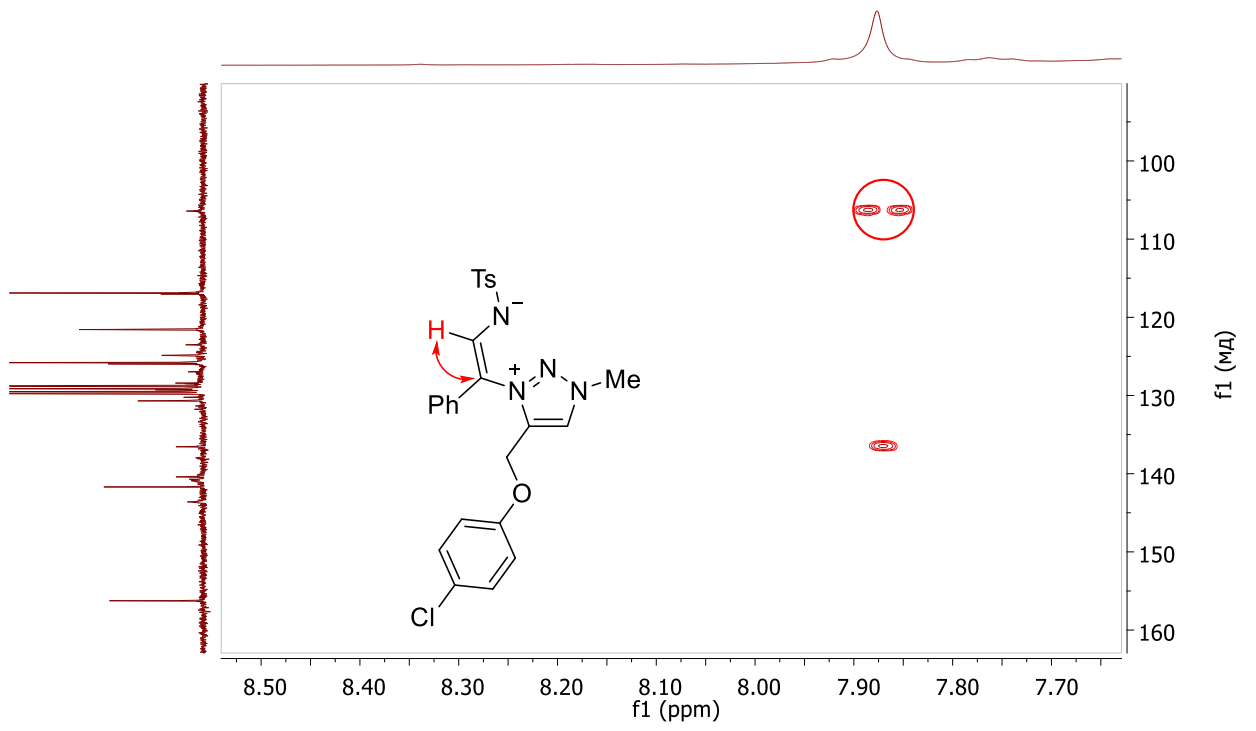

# $^1\text{H}$ - $^{15}\text{N}$ HMBC spectrum

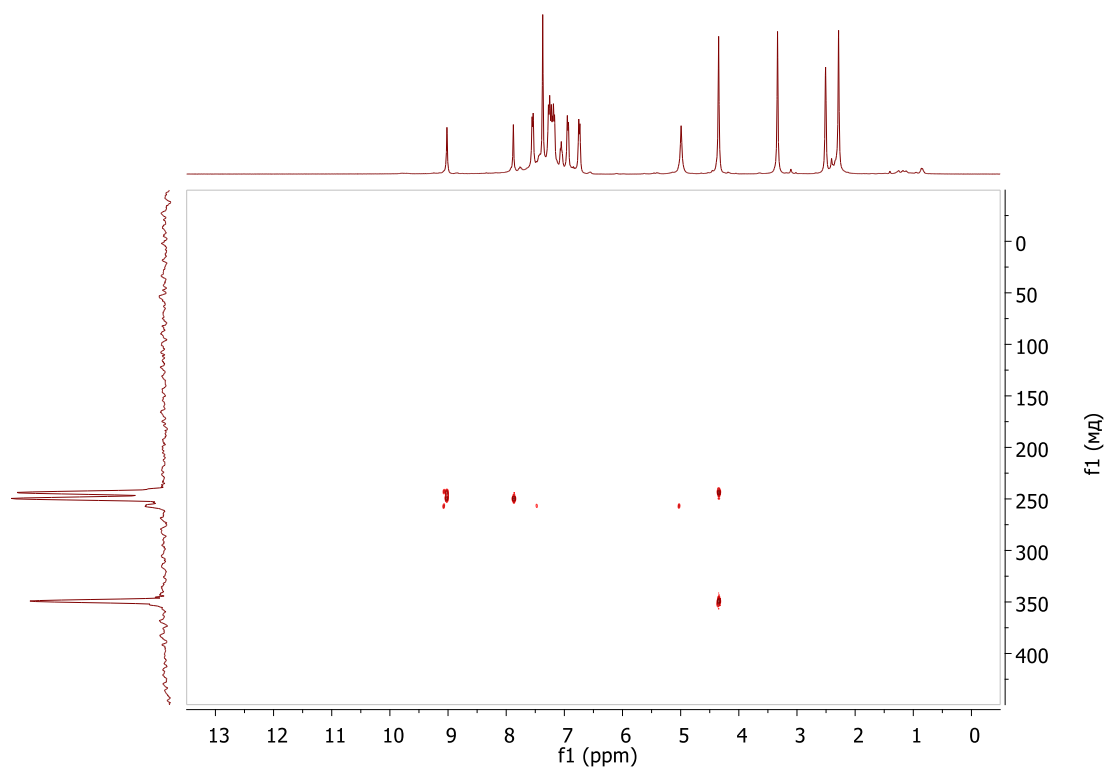

## Key cross-peaks in $^1\text{H}$ - $^{15}\text{N}$ HMBC spectrum

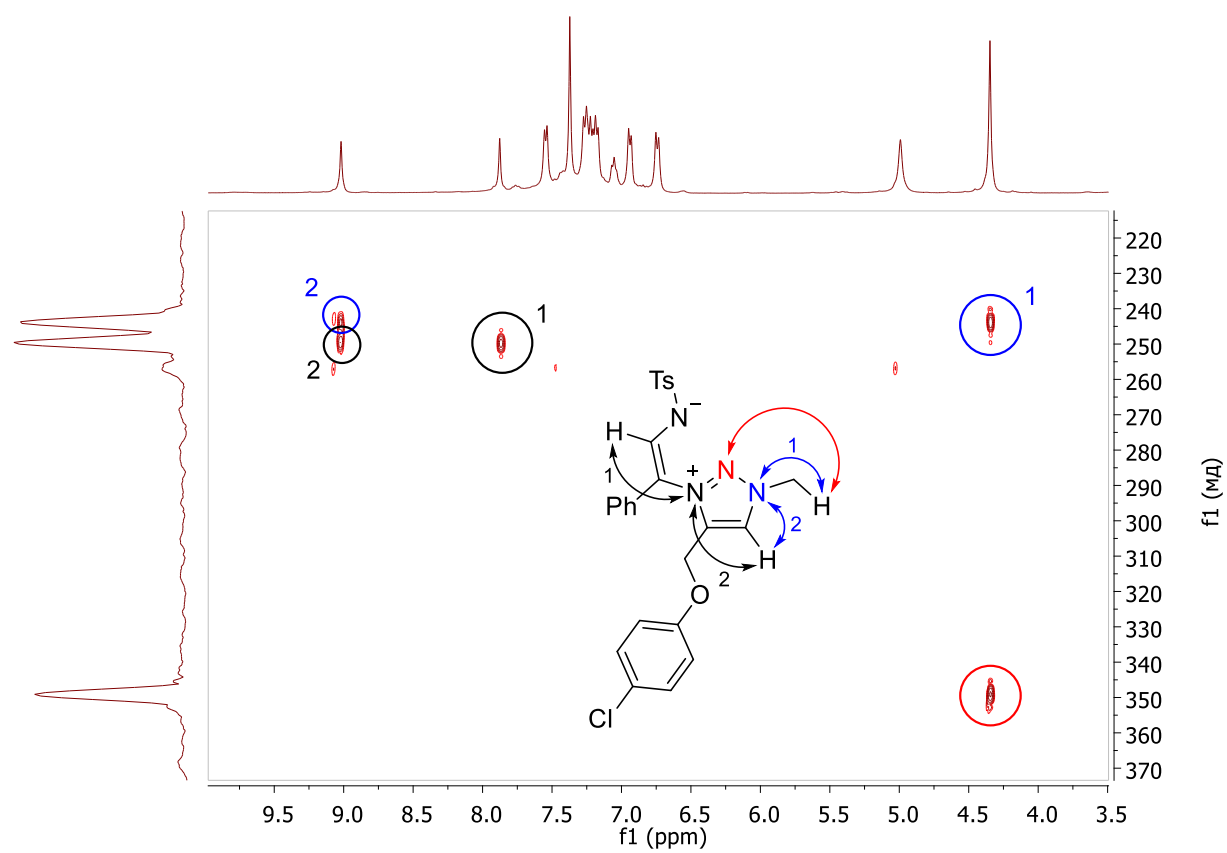

## 2D NOESY spectrum

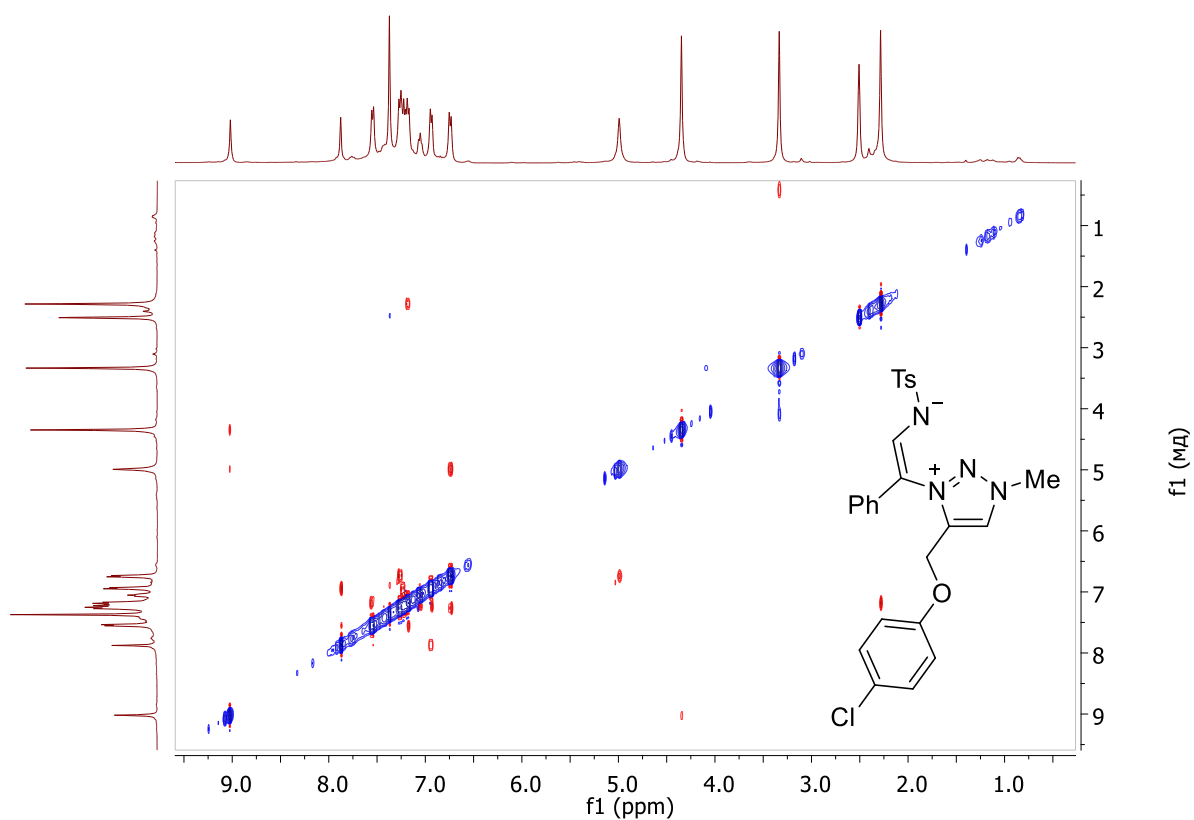

## Key cross-peaks in 2D NOESY spectrum

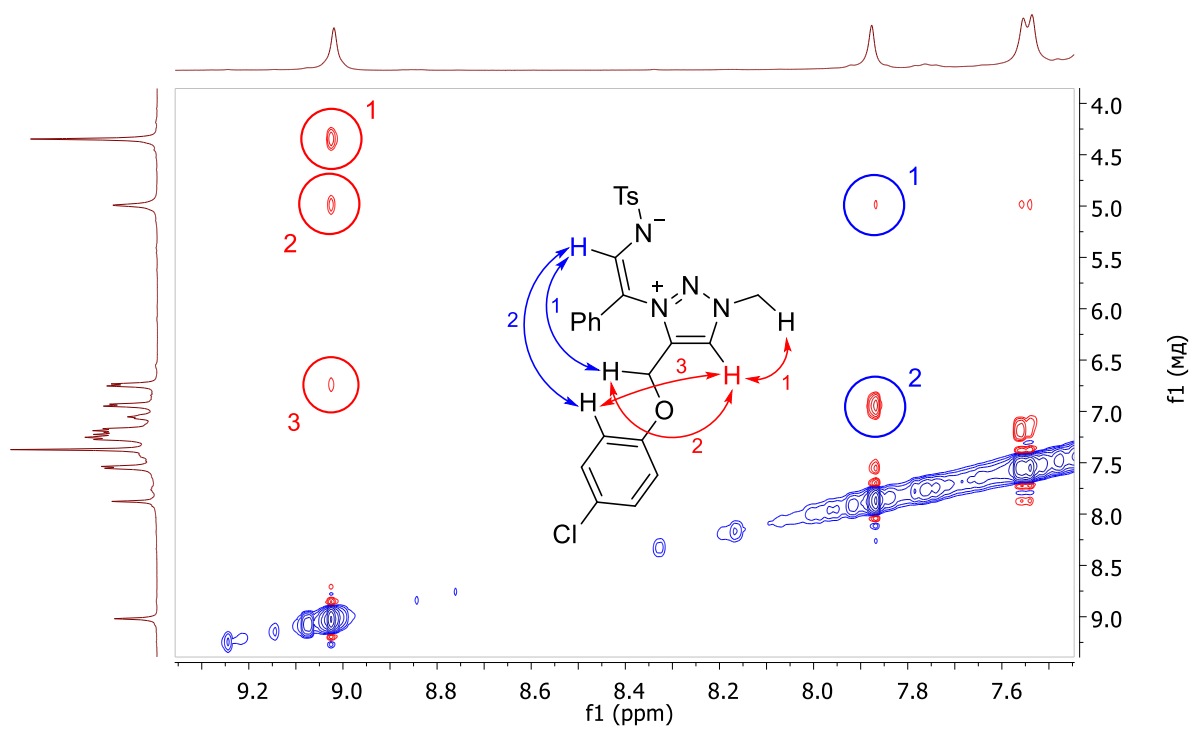

# Key cross-peaks in COSY $^1\text{H}$ - $^1\text{H}$ spectrum

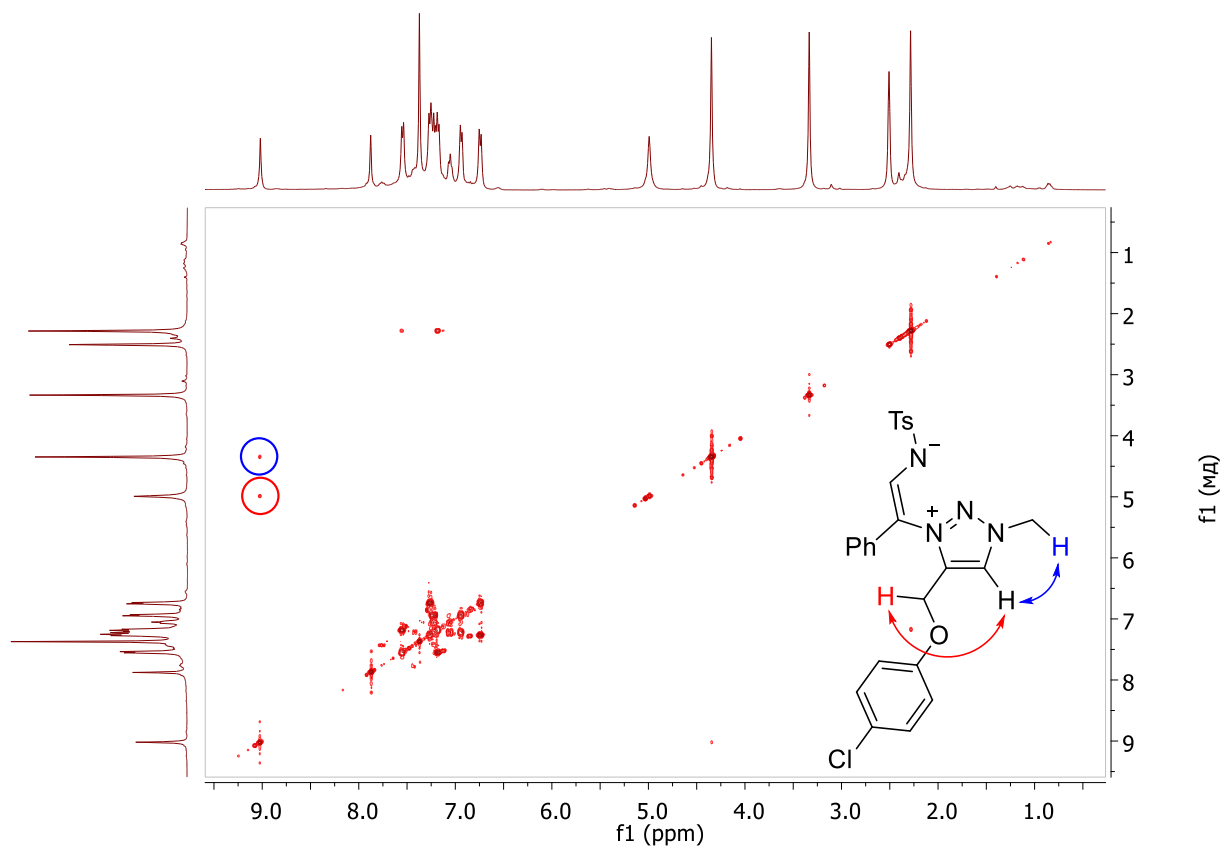

$^1\text{H}$  and  $^{13}\text{C}$  NMR spectra of compound **20c**

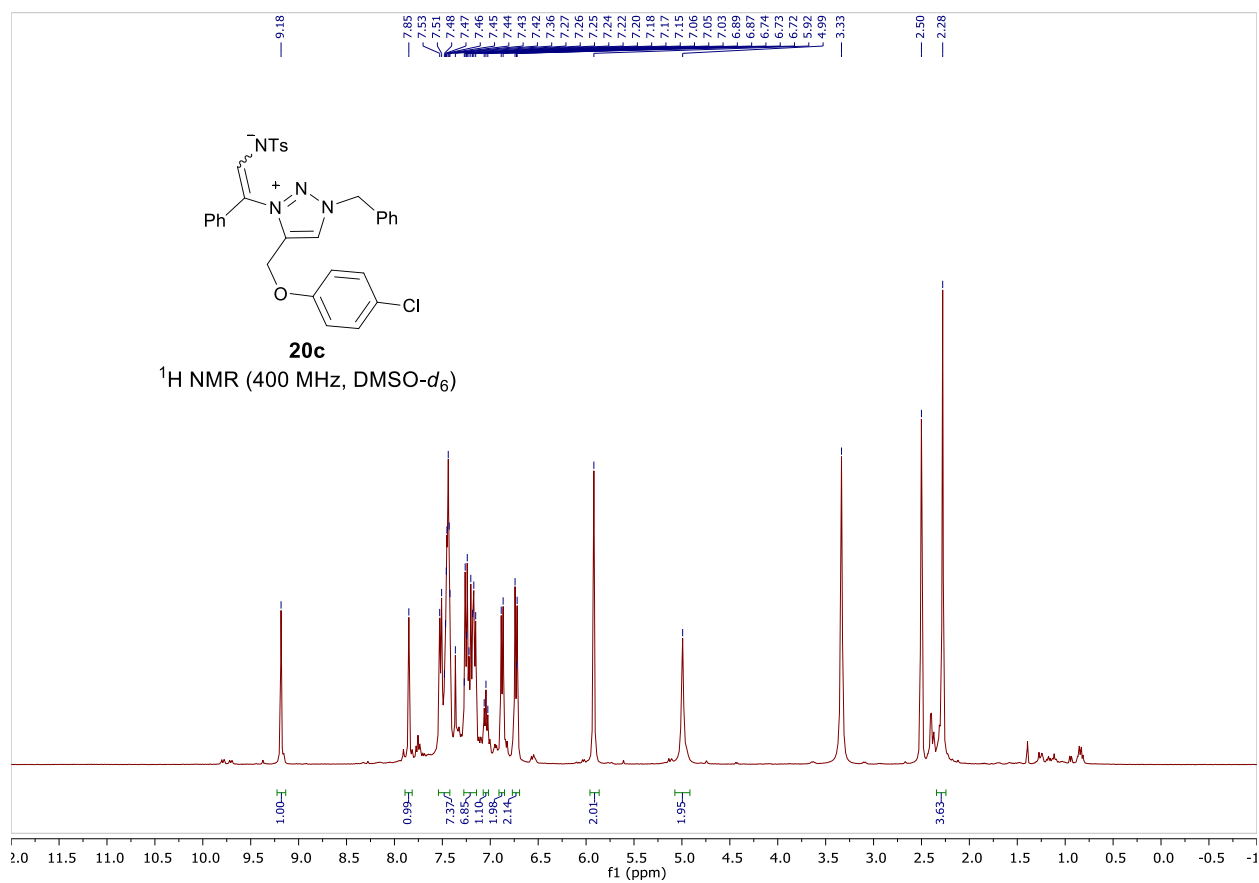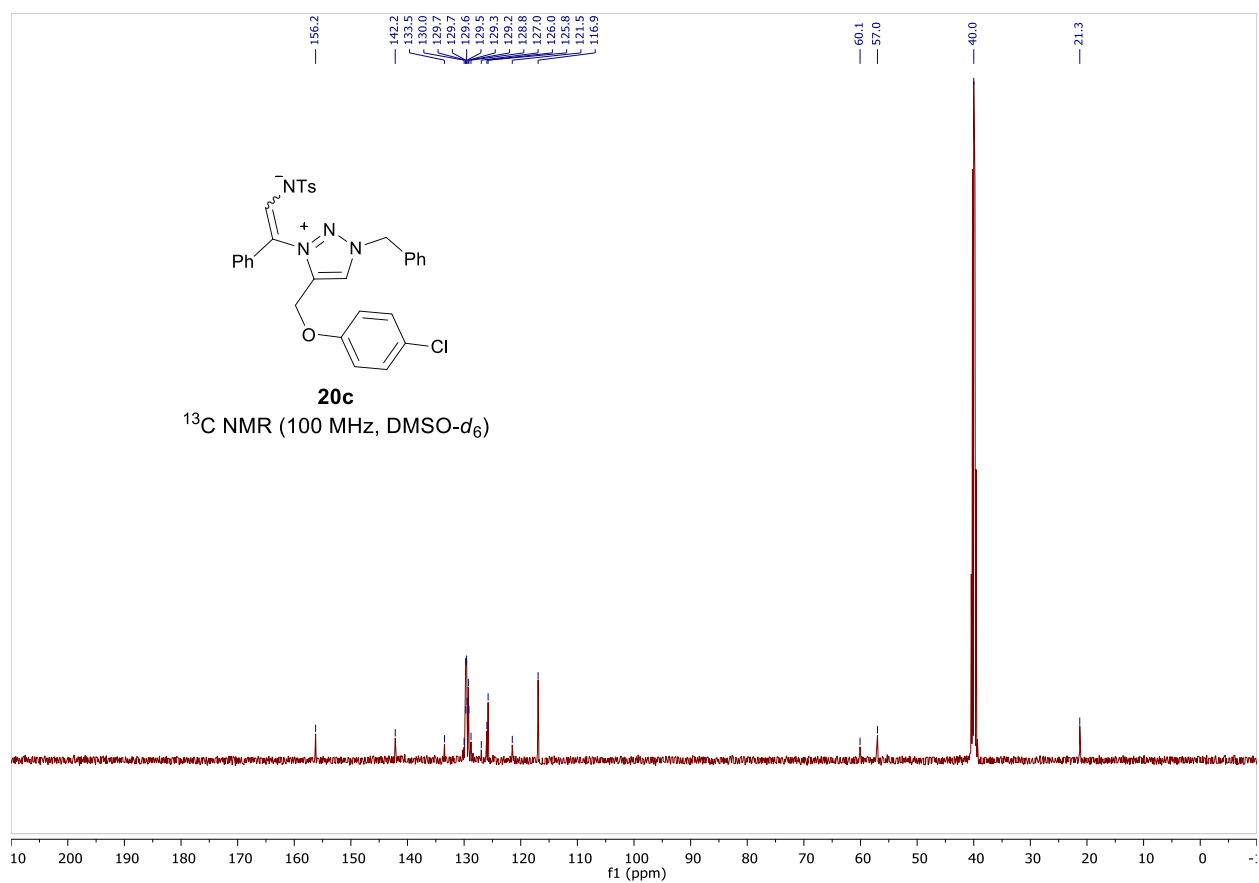



# $^1\text{H}$ and $^{13}\text{C}$ NMR spectra of compound **20d**

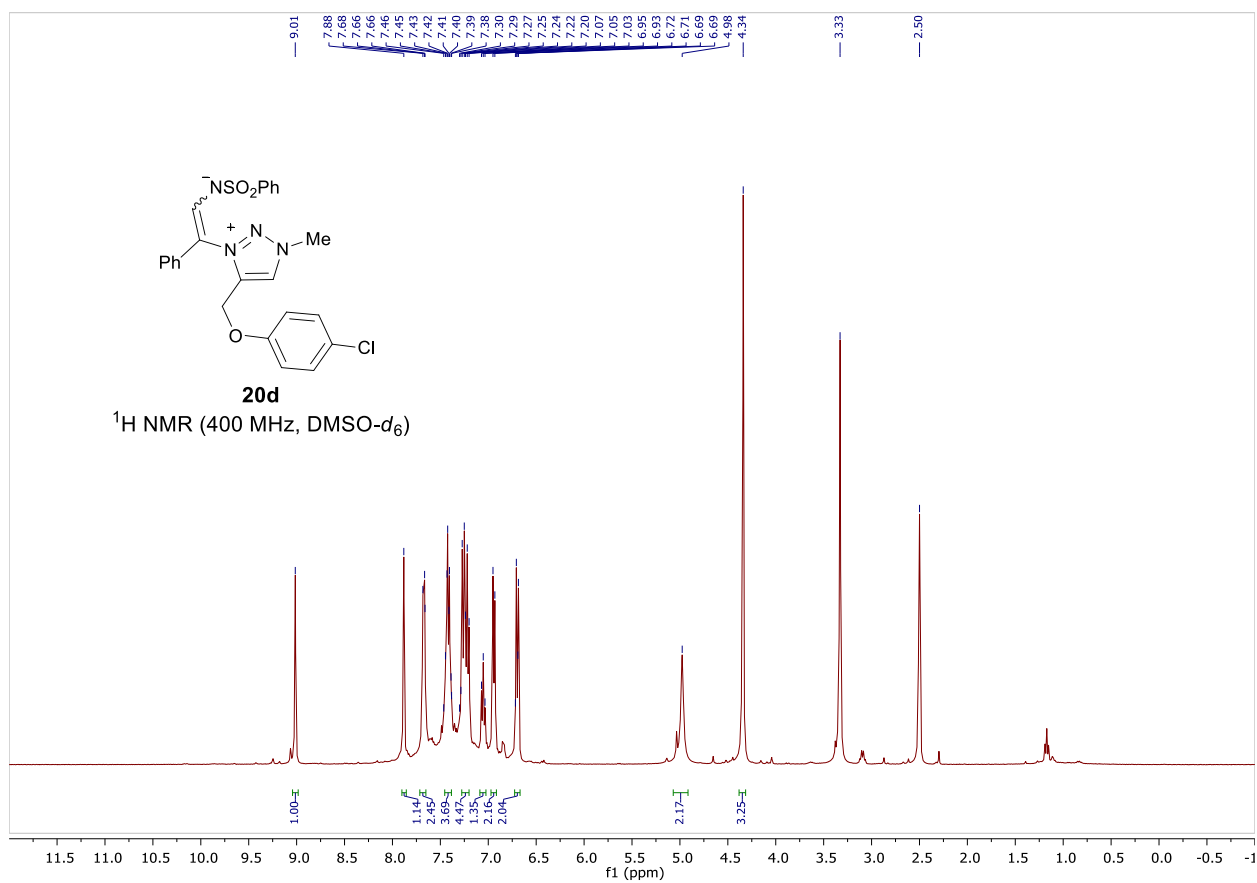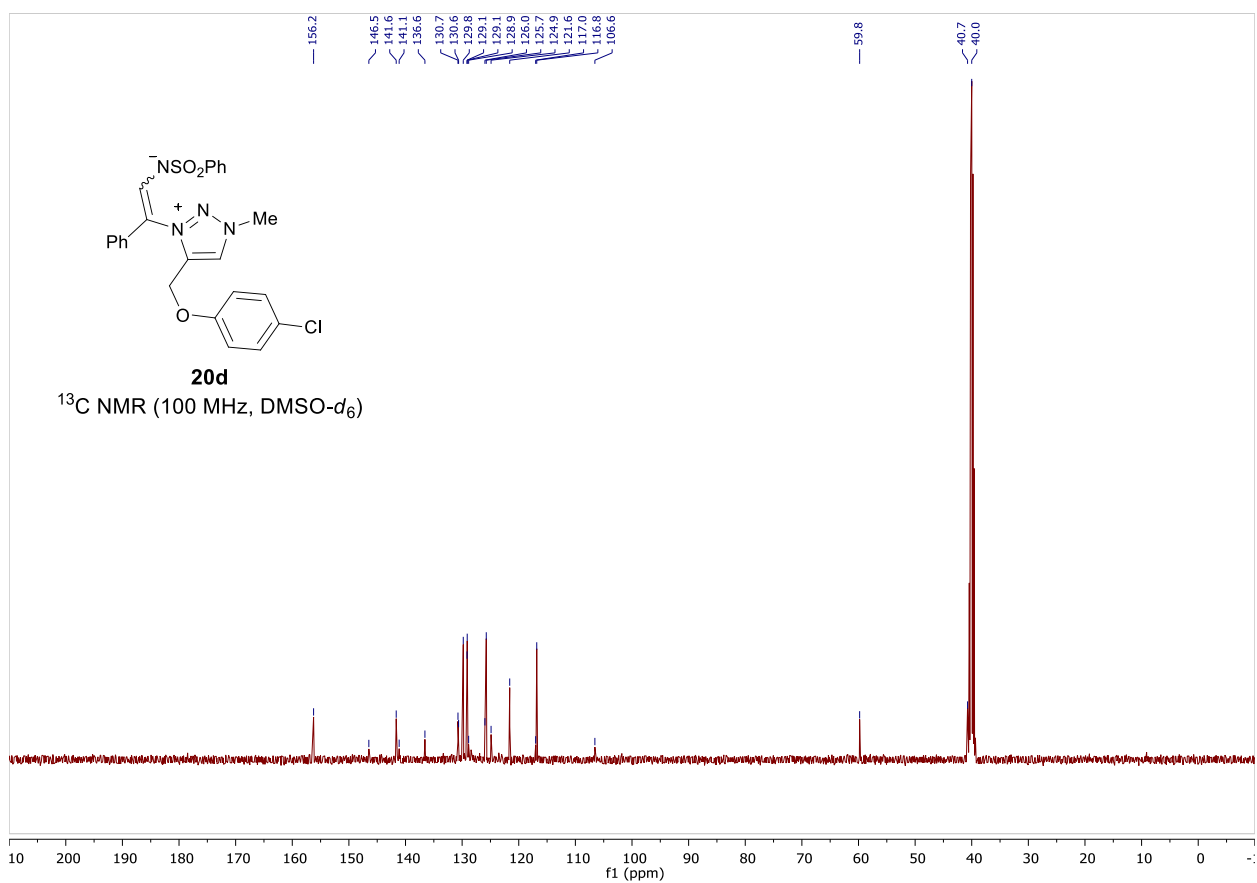

# $^1\text{H}$ and $^{13}\text{C}$ NMR spectra of compound **20e**

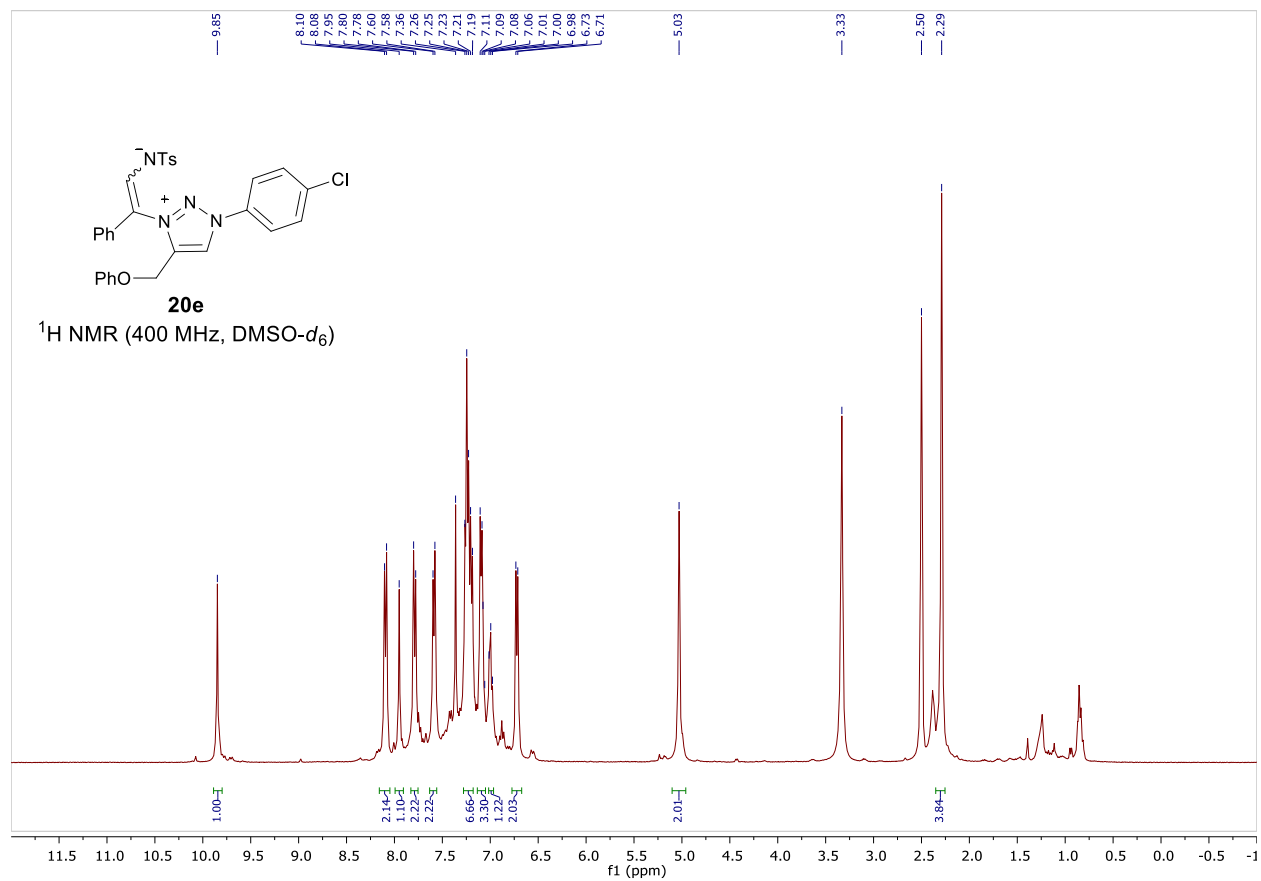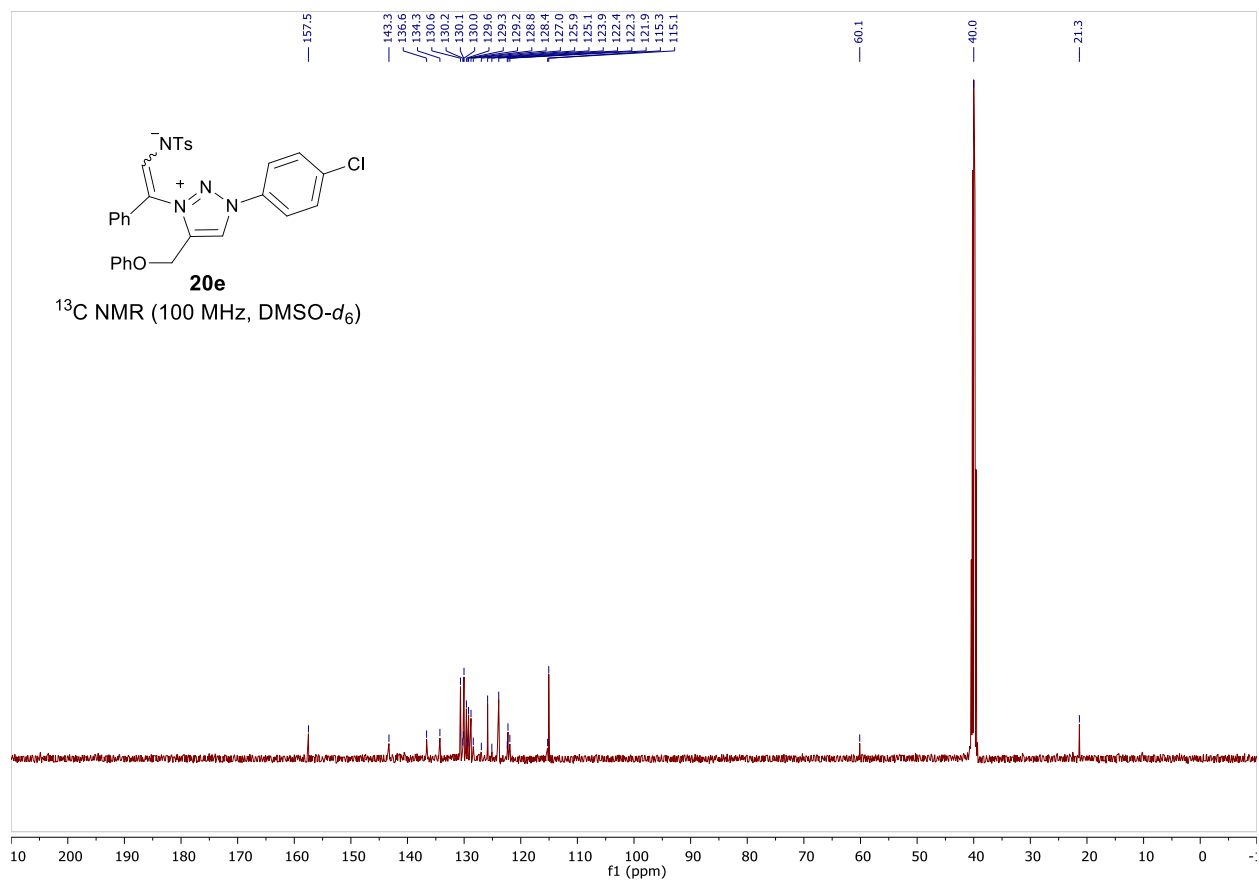

$^1\text{H}$  and  $^{13}\text{C}$  NMR spectra of compound **20f**

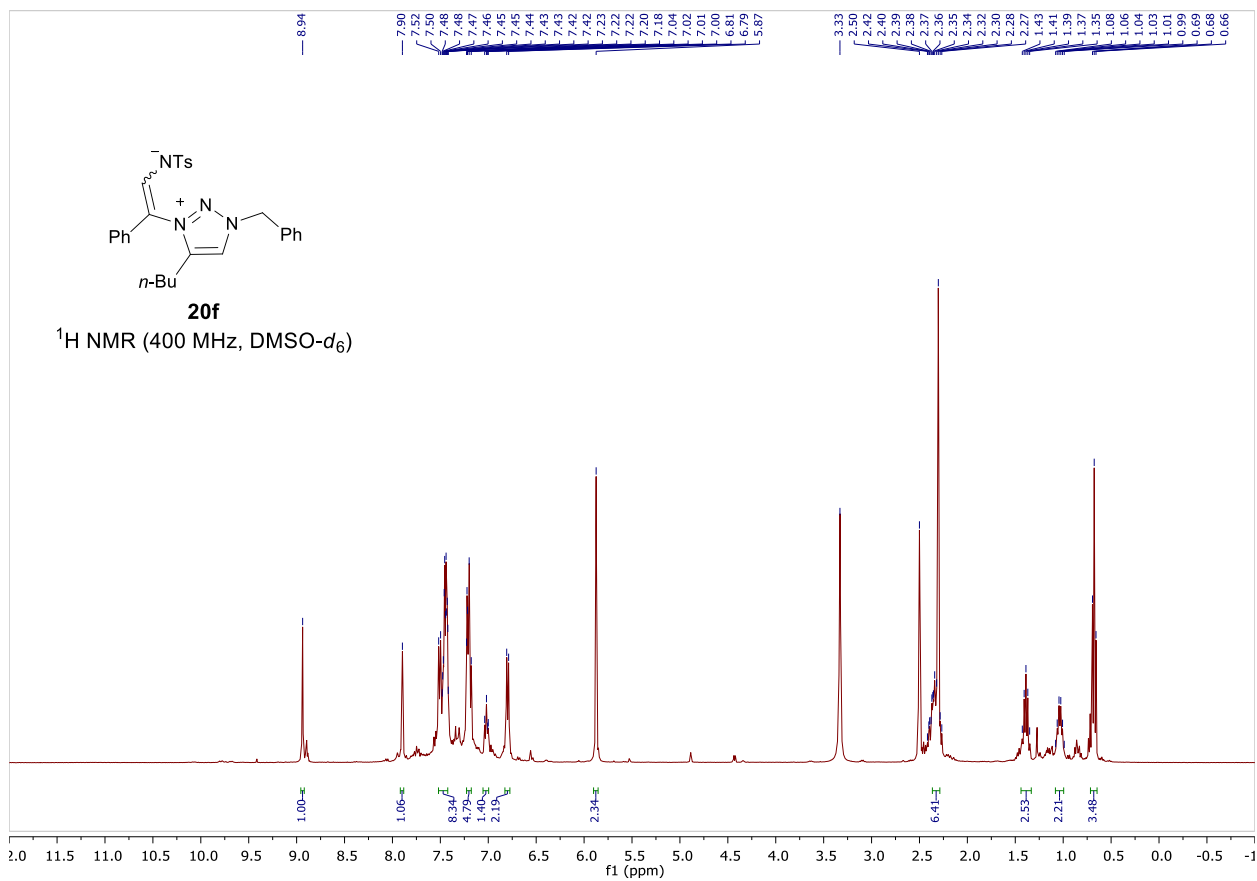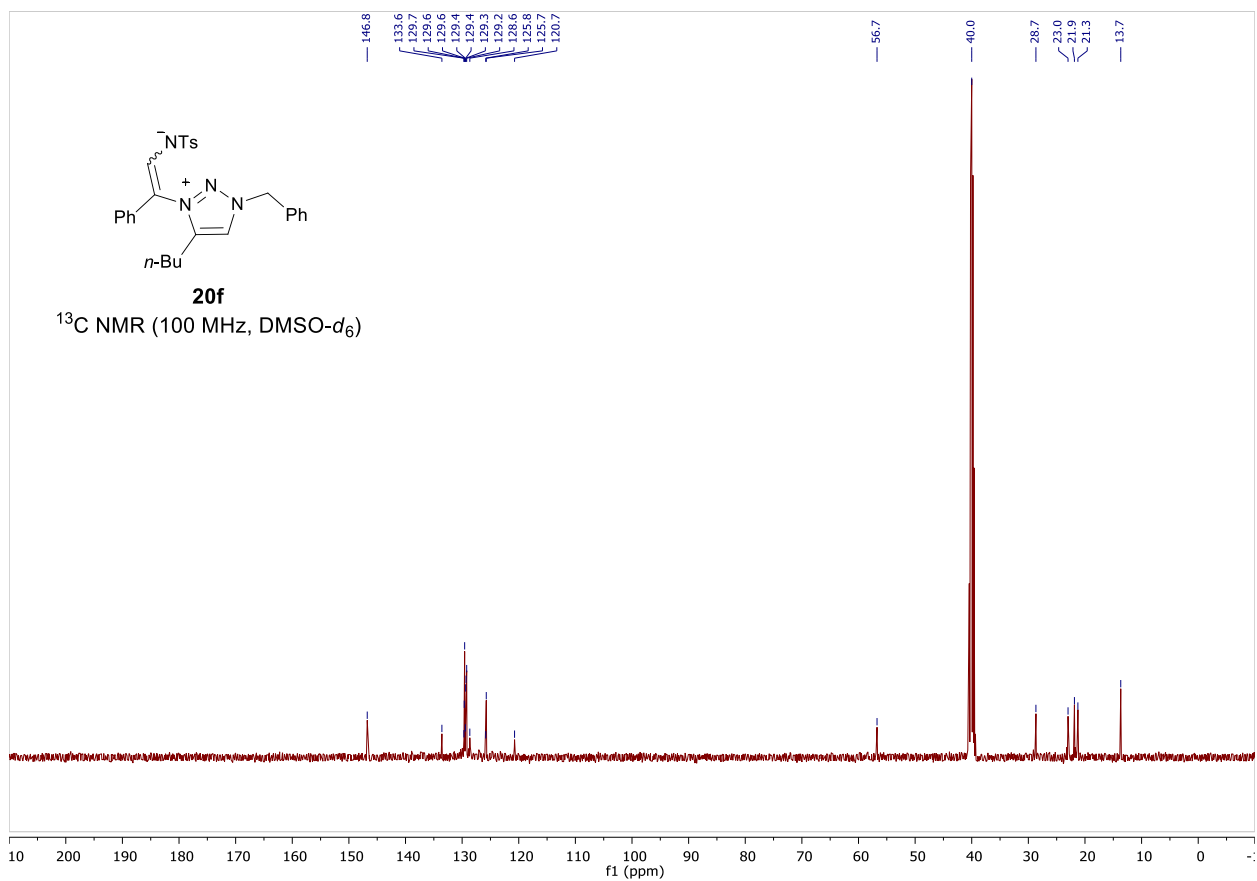

# $^1\text{H}$ and $^{13}\text{C}$ NMR spectra of compound **20g**

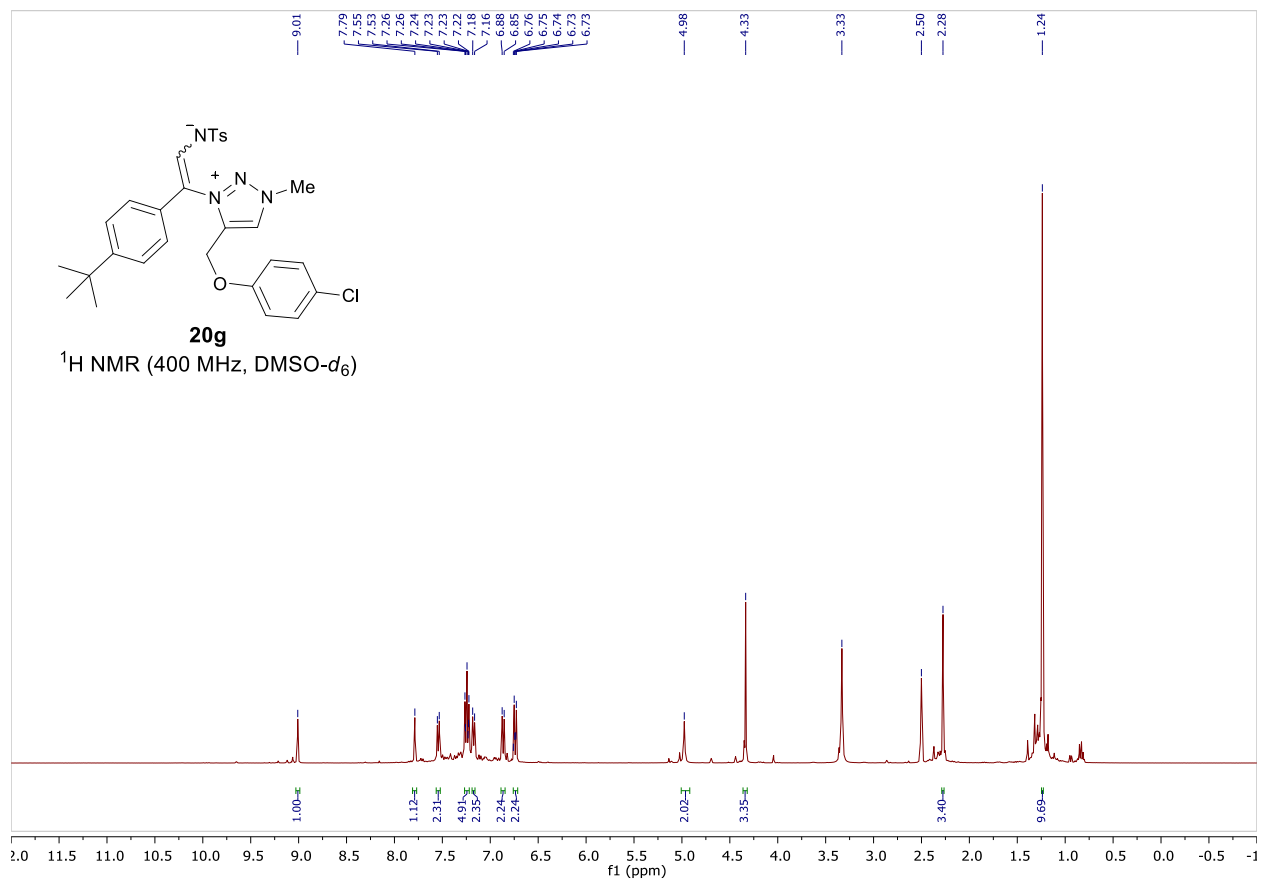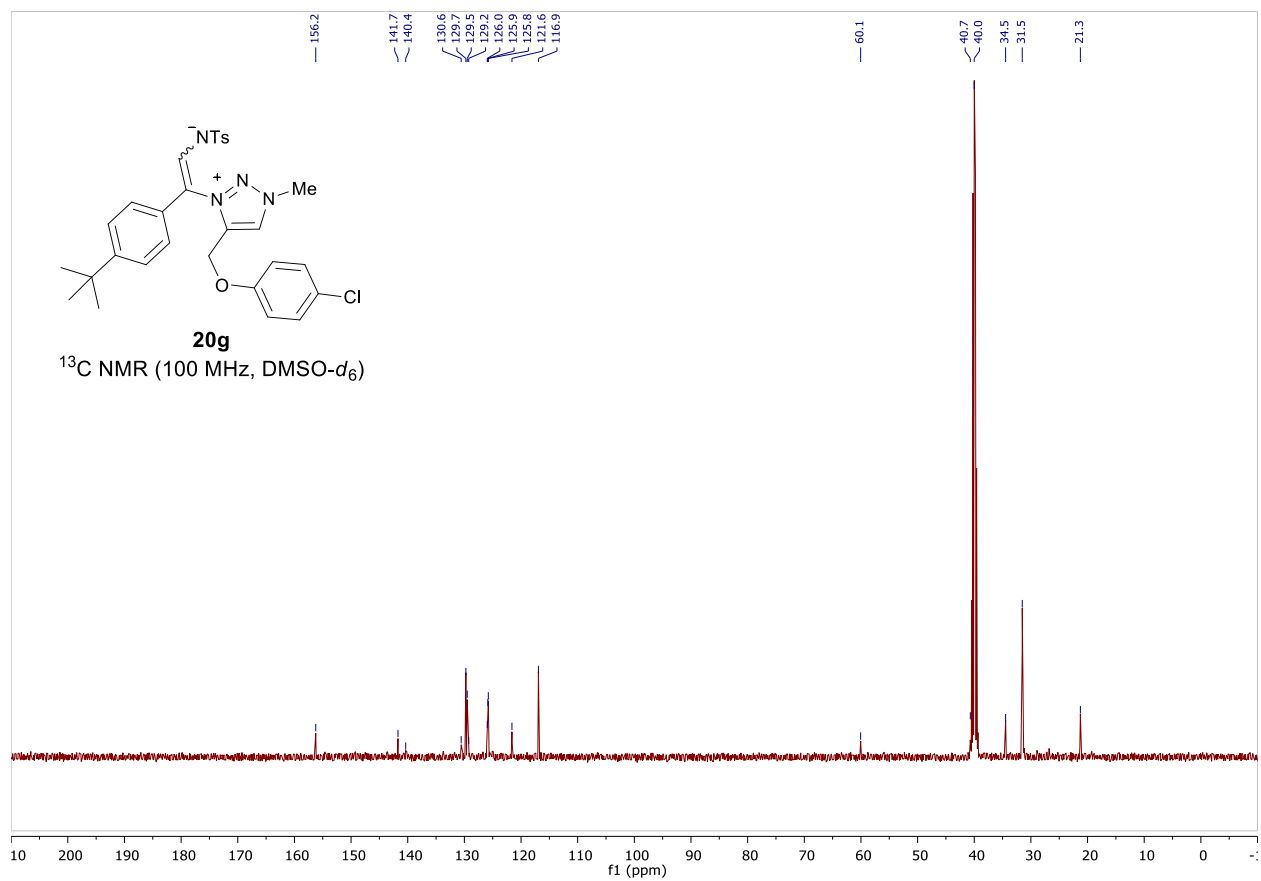

## 6. X-ray data of compound 3b

Single crystals of  $C_{24}H_{21}ClN_2O_2S$  (**3b**) were grown from chloroform by slow evaporation. A suitable crystal was selected and intensity data were collected on a SuperNova, Single source at offset/far, HyPix3000 diffractometer. The crystal was kept at 100.2(4) K during data collection. Using Olex2,<sup>3</sup> the structure was solved with the ShelXT<sup>4</sup> structure solution program using Intrinsic Phasing and refined with the ShelXL<sup>5</sup> refinement package using Least Squares minimisation.

**Figure S1.** X-Ray crystal structure of *N*-(4-(4-chlorophenyl)-1-methyl-2-phenyl-1*H*-pyrrol-3-yl)-4-methylbenzenesulfonamide (**3b**) with 50% ellipsoid probability (CCDC Number 2044431)

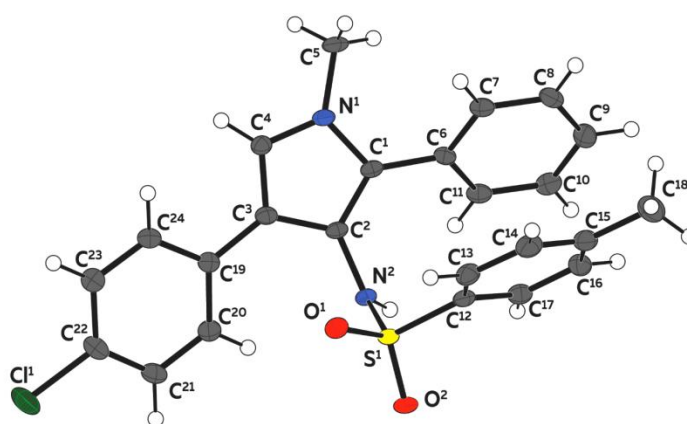

**Table S1.** Crystal data and structure refinement for **3b**.

|                        |                         |
|------------------------|-------------------------|
| Identification code    | RNV52                   |
| Empirical formula      | $C_{24}H_{21}ClN_2O_2S$ |
| Formula weight         | 436.94                  |
| Temperature/K          | 100.2(4)                |
| Crystal system         | monoclinic              |
| Space group            | $P2_1/c$                |
| $a/\text{\AA}$         | 11.98800(10)            |
| $b/\text{\AA}$         | 13.0920(2)              |
| $c/\text{\AA}$         | 13.6788(2)              |
| $\alpha/^\circ$        | 90                      |
| $\beta/^\circ$         | 94.2570(10)             |
| $\gamma/^\circ$        | 90                      |
| Volume/ $\text{\AA}^3$ | 2140.92(5)              |

|                                                |                                                               |
|------------------------------------------------|---------------------------------------------------------------|
| Z                                              | 4                                                             |
| $\rho_{\text{calc}}/\text{cm}^3$               | 1.356                                                         |
| $\mu/\text{mm}^{-1}$                           | 2.678                                                         |
| F(000)                                         | 912.0                                                         |
| Crystal size/ $\text{mm}^3$                    | $0.18 \times 0.13 \times 0.1$                                 |
| Radiation                                      | $\text{CuK}\alpha$ ( $\lambda = 1.54184$ )                    |
| $2\Theta$ range for data collection/ $^\circ$  | 7.394 to 141                                                  |
| Index ranges                                   | $-14 \leq h \leq 14, -16 \leq k \leq 15, -16 \leq l \leq 16$  |
| Reflections collected                          | 13479                                                         |
| Independent reflections                        | 4059 [ $R_{\text{int}} = 0.0586, R_{\text{sigma}} = 0.0482$ ] |
| Data/restraints/parameters                     | 4059/0/277                                                    |
| Goodness-of-fit on $F^2$                       | 1.084                                                         |
| Final R indexes [ $I > 2\sigma(I)$ ]           | $R_1 = 0.0440, wR_2 = 0.1191$                                 |
| Final R indexes [all data]                     | $R_1 = 0.0487, wR_2 = 0.1247$                                 |
| Largest diff. peak/hole / $e \text{ \AA}^{-3}$ | 0.29/-0.58                                                    |

**Table S2.** Fractional Atomic Coordinates ( $\times 10^4$ ) and Equivalent Isotropic Displacement Parameters ( $\text{\AA}^2 \times 10^3$ ) for **3b**.  $U_{\text{eq}}$  is defined as 1/3 of the trace of the orthogonalised  $U_{\text{ij}}$  tensor.

| Atom | x          | y          | z          | $U(\text{eq})$ |
|------|------------|------------|------------|----------------|
| S1   | 8329.6(3)  | 5817.5(3)  | 4559.3(3)  | 14.02(14)      |
| Cl1  | 5640.8(4)  | 6064.9(5)  | 9097.3(4)  | 37.54(18)      |
| O2   | 9390.7(10) | 6178.4(10) | 5002.3(9)  | 17.9(3)        |
| O1   | 7321.2(10) | 6309.8(10) | 4799.0(9)  | 18.8(3)        |
| N1   | 6042.2(12) | 2950.7(12) | 3995.4(11) | 17.1(3)        |
| N2   | 8286.1(12) | 4621.8(11) | 4868.5(10) | 14.1(3)        |
| C4   | 5626.5(14) | 3319.0(14) | 4822.7(13) | 16.5(4)        |
| C19  | 6227.9(14) | 4511.2(14) | 6213.4(13) | 16.0(4)        |
| C1   | 7077.3(14) | 3375.0(14) | 3880.8(13) | 15.4(4)        |
| C3   | 6384.6(14) | 3986.1(14) | 5284.9(13) | 15.1(4)        |
| C6   | 7750.9(14) | 3135.9(13) | 3049.5(13) | 15.8(4)        |
| C2   | 7303.3(14) | 4020.1(13) | 4679.9(13) | 14.3(4)        |

|     |            |            |            |         |
|-----|------------|------------|------------|---------|
| C7  | 7289.1(14) | 3163.5(14) | 2077.1(13) | 18.7(4) |
| C17 | 9245.5(15) | 5353.6(14) | 2856.6(14) | 19.0(4) |
| C24 | 5147.1(14) | 4639.0(14) | 6518.7(13) | 16.8(4) |
| C12 | 8393.2(14) | 5879.4(13) | 3274.6(13) | 16.3(4) |
| C11 | 8885.9(14) | 2895.8(14) | 3218.5(14) | 18.2(4) |
| C9  | 9069.8(16) | 2747.1(15) | 1480.0(14) | 22.6(4) |
| C10 | 9540.0(15) | 2713.1(14) | 2440.6(14) | 21.6(4) |
| C23 | 4964.7(15) | 5099.7(14) | 7404.9(14) | 19.6(4) |
| C8  | 7942.8(16) | 2971.2(15) | 1304.7(14) | 21.2(4) |
| C22 | 5872.0(16) | 5465.9(16) | 7988.2(14) | 22.9(4) |
| C16 | 9312.4(16) | 5403.8(15) | 1851.0(14) | 22.3(4) |
| C13 | 7621.6(14) | 6460.1(16) | 2704.1(14) | 21.6(4) |
| C20 | 7124.5(15) | 4869.6(17) | 6833.3(14) | 24.3(4) |
| C14 | 7713.5(15) | 6510.9(17) | 1698.2(14) | 25.2(4) |
| C21 | 6950.5(16) | 5354.9(17) | 7709.1(14) | 26.5(5) |
| C5  | 5478.1(15) | 2178.1(15) | 3370.5(14) | 23.7(4) |
| C15 | 8552.3(16) | 5978.8(16) | 1257.4(14) | 24.2(4) |
| C18 | 8644.5(19) | 6021.0(19) | 167.7(15)  | 33.4(5) |

**Table S3.** Anisotropic displacement parameters ( $\text{\AA}^2 \times 10^3$ ) for **3b**

| Atom | $U_{11}$ | $U_{22}$ | $U_{33}$ | $U_{23}$  | $U_{13}$  | $U_{12}$  |
|------|----------|----------|----------|-----------|-----------|-----------|
| S1   | 11.8(2)  | 14.1(3)  | 15.7(2)  | -0.86(15) | -2.77(16) | -1.67(15) |
| Cl1  | 32.8(3)  | 53.4(4)  | 25.9(3)  | -19.8(2)  | -1.6(2)   | 6.9(2)    |
| O2   | 14.4(6)  | 17.4(7)  | 21.0(7)  | -2.3(5)   | -3.9(5)   | -3.4(5)   |
| O1   | 14.9(6)  | 18.2(7)  | 23.1(7)  | -0.6(5)   | -0.2(5)   | 0.9(5)    |
| N1   | 14.9(7)  | 16.6(8)  | 19.5(8)  | -3.1(6)   | -1.6(6)   | -4.1(6)   |
| N2   | 11.3(7)  | 14.6(8)  | 16.1(7)  | 0.9(6)    | -2.5(5)   | -1.4(6)   |
| C4   | 15.2(8)  | 18.5(9)  | 15.6(8)  | 1.4(7)    | -1.1(6)   | -1.7(7)   |
| C19  | 18.6(8)  | 14.2(9)  | 14.8(8)  | 3.0(7)    | -1.8(6)   | 0.1(7)    |
| C1   | 12.4(7)  | 14.9(9)  | 18.2(9)  | 0.8(7)    | -3.1(6)   | -1.4(6)   |
| C3   | 14.3(8)  | 15.3(8)  | 15.0(8)  | 2.0(7)    | -3.9(6)   | -0.3(7)   |

|     |          |          |          |         |         |          |
|-----|----------|----------|----------|---------|---------|----------|
| C6  | 17.9(8)  | 12.1(8)  | 17.1(9)  | -2.8(7) | -0.8(6) | -0.3(7)  |
| C2  | 12.3(8)  | 13.5(9)  | 16.5(9)  | 1.7(7)  | -3.7(6) | -1.3(6)  |
| C7  | 16.4(8)  | 17.4(9)  | 21.5(9)  | -2.5(7) | -3.3(7) | 0.1(7)   |
| C17 | 19.9(9)  | 14.7(9)  | 21.9(9)  | 0.9(7)  | -2.0(7) | -1.6(7)  |
| C24 | 17.1(8)  | 14.8(9)  | 17.9(9)  | 1.8(7)  | -3.9(6) | 1.5(7)   |
| C12 | 15.5(8)  | 15.5(9)  | 17.4(9)  | 0.6(7)  | -2.0(6) | -4.7(7)  |
| C11 | 18.3(8)  | 13.7(9)  | 22.0(9)  | -1.2(7) | -3.4(7) | 0.7(7)   |
| C9  | 26.4(9)  | 16.2(9)  | 25.9(10) | -4.1(8) | 6.7(8)  | 1.1(7)   |
| C10 | 16.4(8)  | 16.3(9)  | 31.9(10) | -2.6(8) | 0.1(7)  | 2.8(7)   |
| C23 | 19.3(9)  | 18.0(9)  | 21.4(9)  | 0.9(7)  | -0.1(7) | 4.4(7)   |
| C8  | 26.2(9)  | 19.9(10) | 17.0(9)  | -3.7(7) | -1.4(7) | -2.3(8)  |
| C22 | 27.5(10) | 23.4(10) | 17.3(9)  | -3.3(8) | -1.7(7) | 2.4(8)   |
| C16 | 26.2(9)  | 19.9(10) | 21.0(9)  | -2.7(8) | 3.3(7)  | -4.2(8)  |
| C13 | 14.6(8)  | 27.0(11) | 22.8(10) | 2.4(8)  | -2.2(7) | -1.4(7)  |
| C20 | 17.8(9)  | 34.6(12) | 20.1(10) | -2.6(8) | -0.8(7) | -4.7(8)  |
| C14 | 18.5(9)  | 33.9(12) | 22.0(10) | 6.7(8)  | -6.3(7) | -3.3(8)  |
| C21 | 22.0(9)  | 37.3(12) | 19.3(10) | -5.8(9) | -4.5(7) | -4.5(8)  |
| C5  | 20.2(9)  | 22.3(10) | 28.2(10) | -8.3(8) | -0.8(7) | -9.5(8)  |
| C15 | 24.9(10) | 28.2(11) | 19.0(10) | 1.3(8)  | -1.7(7) | -9.2(8)  |
| C18 | 38.1(12) | 42.6(13) | 18.9(10) | 1.1(9)  | -2.5(9) | -6.6(10) |

**Table S4.** Bond lengths for **3b**

| Atom Atom Length/Å |     |            | Atom Atom Length/Å |     |          |
|--------------------|-----|------------|--------------------|-----|----------|
| S1                 | O2  | 1.4471(12) | C6                 | C11 | 1.399(2) |
| S1                 | O1  | 1.4294(13) | C7                 | C8  | 1.384(3) |
| S1                 | N2  | 1.6234(15) | C17                | C12 | 1.390(3) |
| S1                 | C12 | 1.7666(19) | C17                | C16 | 1.385(3) |
| C11                | C22 | 1.7482(19) | C24                | C23 | 1.386(3) |
| N1                 | C4  | 1.358(2)   | C12                | C13 | 1.391(3) |
| N1                 | C1  | 1.379(2)   | C11                | C10 | 1.389(3) |
| N1                 | C5  | 1.458(2)   | C9                 | C10 | 1.391(3) |



|     |     |          |     |     |          |
|-----|-----|----------|-----|-----|----------|
| N2  | C2  | 1.425(2) | C9  | C8  | 1.386(3) |
| C4  | C3  | 1.380(2) | C23 | C22 | 1.386(3) |
| C19 | C3  | 1.468(2) | C22 | C21 | 1.383(3) |
| C19 | C24 | 1.401(2) | C16 | C15 | 1.395(3) |
| C19 | C20 | 1.400(2) | C13 | C14 | 1.390(3) |
| C1  | C6  | 1.476(2) | C20 | C21 | 1.385(3) |
| C1  | C2  | 1.392(2) | C14 | C15 | 1.396(3) |
| C3  | C2  | 1.427(2) | C15 | C18 | 1.504(3) |
| C6  | C7  | 1.403(2) |     |     |          |

**Table S5.** Bond angles for **3b**

| Atom Atom Atom Angle/° |     |     |            | Atom Atom Atom Angle/° |     |     |            |
|------------------------|-----|-----|------------|------------------------|-----|-----|------------|
| O2                     | S1  | N2  | 104.48(7)  | C1                     | C2  | N2  | 126.00(16) |
| O2                     | S1  | C12 | 107.46(8)  | C1                     | C2  | C3  | 108.85(15) |
| O1                     | S1  | O2  | 119.27(8)  | C8                     | C7  | C6  | 120.87(17) |
| O1                     | S1  | N2  | 109.33(8)  | C16                    | C17 | C12 | 118.91(17) |
| O1                     | S1  | C12 | 107.89(8)  | C23                    | C24 | C19 | 121.49(16) |
| N2                     | S1  | C12 | 107.94(8)  | C17                    | C12 | S1  | 118.29(14) |
| C4                     | N1  | C1  | 109.91(14) | C17                    | C12 | C13 | 121.23(17) |
| C4                     | N1  | C5  | 123.49(15) | C13                    | C12 | S1  | 120.47(15) |
| C1                     | N1  | C5  | 126.51(15) | C10                    | C11 | C6  | 120.64(17) |
| C2                     | N2  | S1  | 121.88(12) | C8                     | C9  | C10 | 119.44(18) |
| N1                     | C4  | C3  | 109.67(15) | C11                    | C10 | C9  | 120.40(17) |
| C24                    | C19 | C3  | 119.63(15) | C24                    | C23 | C22 | 119.09(17) |
| C20                    | C19 | C3  | 122.62(16) | C7                     | C8  | C9  | 120.41(17) |
| C20                    | C19 | C24 | 117.71(17) | C23                    | C22 | C11 | 119.12(15) |
| N1                     | C1  | C6  | 123.39(15) | C21                    | C22 | C11 | 119.90(14) |
| N1                     | C1  | C2  | 106.23(15) | C21                    | C22 | C23 | 120.98(17) |
| C2                     | C1  | C6  | 130.38(16) | C17                    | C16 | C15 | 121.33(18) |
| C4                     | C3  | C19 | 124.79(16) | C14                    | C13 | C12 | 118.89(18) |
| C4                     | C3  | C2  | 105.34(16) | C21                    | C20 | C19 | 121.30(17) |

|     |    |     |            |     |     |     |            |
|-----|----|-----|------------|-----|-----|-----|------------|
| C2  | C3 | C19 | 129.87(16) | C13 | C14 | C15 | 121.06(18) |
| C7  | C6 | C1  | 121.67(16) | C22 | C21 | C20 | 119.39(17) |
| C11 | C6 | C1  | 120.08(16) | C16 | C15 | C14 | 118.56(18) |
| C11 | C6 | C7  | 118.24(16) | C16 | C15 | C18 | 120.25(19) |
| N2  | C2 | C3  | 125.16(16) | C14 | C15 | C18 | 121.19(19) |

**Table S6.** Hydrogen atom coordinates ( $\text{\AA}\times 10^4$ ) and isotropic displacement parameters ( $\text{\AA}^2\times 10^3$ ) for **3b**

| Atom | x        | y        | z        | U(eq) |
|------|----------|----------|----------|-------|
| H4   | 4936     | 3147     | 5044     | 20    |
| H7   | 6534     | 3313     | 1950     | 22    |
| H17  | 9762     | 4974     | 3246     | 23    |
| H24  | 4538     | 4410     | 6118     | 20    |
| H11  | 9206     | 2858     | 3858     | 22    |
| H9   | 9508     | 2621     | 960      | 27    |
| H10  | 10297    | 2567     | 2562     | 26    |
| H23  | 4243     | 5162     | 7605     | 24    |
| H8   | 7624     | 2992     | 664      | 25    |
| H16  | 9875     | 5047     | 1566     | 27    |
| H13  | 7054     | 6808     | 2991     | 26    |
| H20  | 7851     | 4780     | 6654     | 29    |
| H14  | 7208     | 6906     | 1313     | 30    |
| H21  | 7554     | 5604     | 8106     | 32    |
| H5A  | 5048     | 1739     | 3761     | 36    |
| H5B  | 6025     | 1780     | 3060     | 36    |
| H5C  | 4990     | 2506     | 2878     | 36    |
| H18A | 9413     | 6114     | 36       | 50    |
| H18B | 8208     | 6582     | -104     | 50    |
| H18C | 8371     | 5394     | -125     | 50    |
| H2   | 8950(20) | 4317(18) | 4892(17) | 27(6) |

## 7. Calculation details

All calculations were performed by using the Gaussian 09 suite of quantum chemical programs.<sup>6</sup> Geometry optimizations of compounds **3o**, **12–17**, **19**, dinitrogen and transition states TS2, TS4–TS9, TS11 were performed at the DFT B3LYP/6-31+G(d,p) level using PCM model for 1,2-dichloroethane. Complexes **11**, **18**, Rh<sub>2</sub>(OAc)<sub>4</sub>, and transition states TS1, TS3, TS10 were optimized employing a Stuttgart RSC 1997 ECP basis set for rhodium and a 6-31+G(d,p) basis set for other atoms. Stationary points on the respective potential-energy surfaces were characterized at the same level of theory by evaluating the corresponding Hessian indices. Careful verification of the unique imaginary frequencies for transition states was carried out to check whether the frequency indeed pertains to the desired reaction coordinate.

**Table S7.** Energies (au) and cartesian coordinates of stationary points for compounds **3o**, **11–19**, and transition states TS1–TS11 (DFT B3LYP/6-31+G(d,p)/Stuttgart RSC 1997 ECP, PCM for DCE, 357 K).

| Pyrrole <b>3o</b>                                                                   |             |            |             | Complex <b>11</b>                                                                     |             |             |             |
|-------------------------------------------------------------------------------------|-------------|------------|-------------|---------------------------------------------------------------------------------------|-------------|-------------|-------------|
| 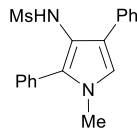 |             |            |             |  |             |             |             |
| Zero-point correction = 0.326176                                                    |             |            |             | Zero-point correction = 0.547656                                                      |             |             |             |
| Thermal correction to Energy = 0.355726                                             |             |            |             | Thermal correction to Energy = 0.610166                                               |             |             |             |
| Thermal correction to Enthalpy = 0.356857                                           |             |            |             | Thermal correction to Enthalpy = 0.611297                                             |             |             |             |
| Thermal correction to Gibbs Free Energy = 0.257958                                  |             |            |             | Thermal correction to Gibbs Free Energy = 0.437343                                    |             |             |             |
| E <sub>0</sub> = -1354.582560, E = -1354.553010,                                    |             |            |             | E <sub>0</sub> = -2599.117611, E = -2599.055101,                                      |             |             |             |
| H = -1354.551879, G = -1354.650779.                                                 |             |            |             | H = -2599.053970, G = -2599.227925.                                                   |             |             |             |
| Imaginary frequency = 0.                                                            |             |            |             | Imaginary frequency = 0.                                                              |             |             |             |
|  |             |            |             |   |             |             |             |
| C                                                                                   | -1.07328707 | 3.88643101 | -0.23141440 | C                                                                                     | -4.66332300 | -1.19131100 | -0.12965500 |
| O                                                                                   | 1.53106293  | 3.47581801 | -0.01476140 | C                                                                                     | -3.01452700 | 3.30143100  | 1.45490300  |
| O                                                                                   | -0.01957407 | 2.28230501 | 1.61913060  | N                                                                                     | -2.51069500 | -0.07457400 | 0.33990100  |
| S                                                                                   | 0.25633193  | 2.78191601 | 0.26175360  | N                                                                                     | -2.09505800 | 1.09787100  | 0.74541700  |
| N                                                                                   | 0.07907893  | 1.47918201 | -0.83337640 | N                                                                                     | -3.15223600 | 1.92032400  | 0.98444000  |

|   |             |             |             |    |             |             |             |
|---|-------------|-------------|-------------|----|-------------|-------------|-------------|
| C | -2.51915507 | -0.17873899 | -0.21004640 | C  | -4.26814500 | 1.23728500  | 0.70790700  |
| C | 0.06625093  | 0.13715301  | -0.35797940 | C  | -3.85806600 | -0.03650900 | 0.29426300  |
| C | -1.09807007 | -0.57745399 | -0.08684340 | C  | -4.03183800 | -2.38052700 | -0.53284200 |
| C | 2.63208893  | -0.40154999 | -0.20273640 | C  | -4.79391500 | -3.47705100 | -0.93717000 |
| C | -1.60439407 | -2.91634999 | 0.73608960  | C  | -6.19125600 | -3.40165600 | -0.94646600 |
| N | -0.71268407 | -1.82393999 | 0.35855460  | C  | -6.82419700 | -2.22008700 | -0.54724000 |
| C | 0.65854893  | -1.90586499 | 0.36645260  | C  | -6.06630400 | -1.12058900 | -0.14049700 |
| C | 1.19309893  | -0.70682899 | -0.07169440 | H  | -2.43909100 | 3.31238100  | 2.38063600  |
| C | 3.52064193  | -0.68600399 | 0.85124860  | H  | -2.51802900 | 3.89247900  | 0.68586600  |
| C | 4.88757493  | -0.42568599 | 0.72899860  | H  | -4.01854500 | 3.68144600  | 1.63411900  |
| C | 5.39599393  | 0.13656101  | -0.44630840 | H  | -5.24220100 | 1.68749000  | 0.81969900  |
| C | 4.52558193  | 0.42583201  | -1.50180740 | H  | -2.94862400 | -2.43645300 | -0.53001400 |
| C | 3.16043593  | 0.15451501  | -1.38274940 | H  | -4.29588500 | -4.39080600 | -1.24746100 |
| C | -3.08106707 | 0.75511201  | 0.67693460  | H  | -6.78189100 | -4.25610200 | -1.26314200 |
| C | -4.42316007 | 1.12900201  | 0.55997360  | H  | -7.90789900 | -2.15216500 | -0.55202800 |
| C | -5.22285207 | 0.57339801  | -0.44317240 | H  | -6.57458900 | -0.21145900 | 0.16622900  |
| C | -4.67409707 | -0.35843099 | -1.33045540 | C  | -0.71134500 | 1.51160300  | 0.94571700  |
| C | -3.33244207 | -0.73055399 | -1.21545140 | C  | -0.24959100 | 2.41452000  | -0.04099900 |
| H | -1.00667507 | 4.76719001  | 0.40957960  | N  | -0.94903700 | 2.73926100  | -1.11211800 |
| H | -2.02184307 | 3.36870001  | -0.09245540 | S  | -0.20298400 | 3.74440900  | -2.21533300 |
| H | -0.92291507 | 4.15813901  | -1.27684140 | O  | 0.01101900  | 3.01591300  | -3.48811900 |
| H | 0.70463093  | 1.64560901  | -1.61778140 | O  | 0.96979100  | 4.45921100  | -1.64630600 |
| H | -1.04069507 | -3.63242799 | 1.33526160  | C  | -1.50017300 | 4.95473700  | -2.50916200 |
| H | -2.43480607 | -2.53244299 | 1.33119360  | C  | -0.33484800 | 1.59832300  | 2.38438200  |
| H | -2.00345807 | -3.42588699 | -0.14590440 | C  | 0.55447600  | 2.57863600  | 2.86899200  |
| H | 1.15496593  | -2.81830699 | 0.66403360  | C  | 0.88711100  | 2.63944900  | 4.22300800  |
| H | 3.13005493  | -1.10045499 | 1.77607760  | C  | 0.32722600  | 1.73983400  | 5.13639500  |
| H | 5.55362493  | -0.65218599 | 1.55690060  | C  | -0.56799700 | 0.77170200  | 4.67150000  |
| H | 6.45759293  | 0.34628801  | -0.53887240 | C  | -0.89096400 | 0.69833500  | 3.31514700  |
| H | 4.90972993  | 0.85381901  | -2.42347240 | H  | 0.73732900  | 2.84782800  | 0.12146900  |
| H | 2.50619193  | 0.34725201  | -2.22863940 | H  | -1.13296900 | 5.62410400  | -3.28935500 |
| H | -2.46258207 | 1.17759801  | 1.46278360  | H  | -1.68573900 | 5.50482700  | -1.58610600 |
| H | -4.84359107 | 1.84999901  | 1.25524360  | H  | -2.39553400 | 4.42910900  | -2.84198300 |
| H | -6.26568407 | 0.86327901  | -0.53306740 | H  | 0.99324500  | 3.30489300  | 2.19317500  |
| H | -5.28802407 | -0.79168399 | -2.11475540 | H  | 1.57758000  | 3.40527900  | 4.56574500  |
| H | -2.90871807 | -1.44668499 | -1.91384740 | H  | 0.58070700  | 1.79600400  | 6.19090600  |
|   |             |             |             | H  | -1.01303300 | 0.06203400  | 5.36362500  |
|   |             |             |             | H  | -1.56343100 | -0.08195300 | 2.97429900  |
|   |             |             |             | Rh | 2.54778900  | -1.98218800 | -0.65703500 |
|   |             |             |             | Rh | 0.96636700  | -0.28546700 | 0.03897500  |
|   |             |             |             | O  | 1.96334100  | 1.00707700  | -1.23000600 |
|   |             |             |             | C  | 2.93742200  | 0.58828900  | -1.93855100 |
|   |             |             |             | O  | 3.39128800  | -0.60319300 | -1.93095400 |
|   |             |             |             | O  | 2.30219200  | 0.20372100  | 1.53785000  |
|   |             |             |             | C  | 3.41408400  | -0.41286000 | 1.62450400  |
|   |             |             |             | O  | 3.80066800  | -1.35034300 | 0.85041300  |
|   |             |             |             | O  | 0.12088700  | -1.72483300 | 1.26671600  |
|   |             |             |             | C  | 0.63181200  | -2.89014300 | 1.32140800  |
|   |             |             |             | O  | 1.63692300  | -3.29054400 | 0.64441400  |
|   |             |             |             | O  | -0.21791800 | -0.88607500 | -1.54662900 |
|   |             |             |             | C  | 0.15700100  | -1.84764300 | -2.29162200 |
|   |             |             |             | O  | 1.22888300  | -2.52569600 | -2.14218600 |
|   |             |             |             | C  | 0.01497900  | -3.87268300 | 2.28948400  |
|   |             |             |             | H  | 0.15295700  | -4.89590600 | 1.93552000  |

|    |                                                                                     |             |             |                                                                                      |             |
|----|-------------------------------------------------------------------------------------|-------------|-------------|--------------------------------------------------------------------------------------|-------------|
|    |                                                                                     | H           | 0.51850900  | -3.77426900                                                                          | 3.25789900  |
|    |                                                                                     | H           | -1.04528900 | -3.65703100                                                                          | 2.43218700  |
|    |                                                                                     | C           | 4.34467100  | -0.02193600                                                                          | 2.74825600  |
|    |                                                                                     | H           | 4.06483600  | 0.94688900                                                                           | 3.16303800  |
|    |                                                                                     | H           | 4.28020200  | -0.77735400                                                                          | 3.53912800  |
|    |                                                                                     | H           | 5.37665600  | -0.00045400                                                                          | 2.39037500  |
|    |                                                                                     | C           | 3.61118000  | 1.59287400                                                                           | -2.84109100 |
|    |                                                                                     | H           | 2.85760600  | 2.18496900                                                                           | -3.36514000 |
|    |                                                                                     | H           | 4.20635100  | 2.27805500                                                                           | -2.22775100 |
|    |                                                                                     | H           | 4.26770400  | 1.09021900                                                                           | -3.55236800 |
|    |                                                                                     | C           | -0.72371200 | -2.20005400                                                                          | -3.46709100 |
|    |                                                                                     | H           | -0.37878500 | -1.63727100                                                                          | -4.34183700 |
|    |                                                                                     | H           | -0.64691300 | -3.26483300                                                                          | -3.69566800 |
|    |                                                                                     | H           | -1.76045500 | -1.92392700                                                                          | -3.26894300 |
|    | <b>Rh<sub>2</sub>(OAc)<sub>4</sub></b>                                              |             |             |                                                                                      |             |
|    | Zero-point correction = 0.209750                                                    |             |             |                                                                                      |             |
|    | Thermal correction to Energy = 0.238756                                             |             |             |                                                                                      |             |
|    | Thermal correction to Enthalpy = 0.239887                                           |             |             |                                                                                      |             |
|    | Thermal correction to Gibbs Free Energy = 0.139675                                  |             |             |                                                                                      |             |
|    | E <sub>0</sub> = -1135.131097, E = -1135.102092,                                    |             |             |                                                                                      |             |
|    | H = -1135.100961, G = -1135.201173.                                                 |             |             |                                                                                      |             |
|    | Imaginary frequency = 0.                                                            |             |             |                                                                                      |             |
|    | 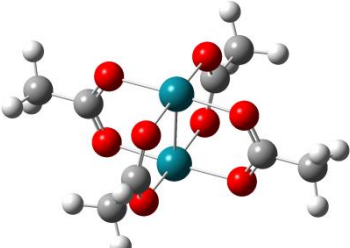 |             |             |                                                                                      |             |
| Rh | 0.00000400                                                                          | -0.00000900 | 1.19405500  |                                                                                      |             |
| Rh | -0.00001600                                                                         | 0.00000200  | -1.19406800 |                                                                                      |             |
| O  | 1.45501200                                                                          | -1.45501300 | -1.13220800 |                                                                                      |             |
| C  | 1.87668000                                                                          | -1.86734300 | -0.00004500 |                                                                                      |             |
| O  | 1.45507300                                                                          | -1.45502100 | 1.13214600  |                                                                                      |             |
| O  | 1.45497100                                                                          | 1.45506600  | -1.13220400 |                                                                                      |             |
| C  | 1.87660100                                                                          | 1.86741300  | -0.00003000 |                                                                                      |             |
| O  | 1.45496800                                                                          | 1.45509300  | 1.13215000  |                                                                                      |             |
| O  | -1.45505600                                                                         | 1.45503300  | -1.13215700 |                                                                                      |             |
| C  | -1.87666700                                                                         | 1.86735700  | 0.00002900  |                                                                                      |             |
| O  | -1.45504200                                                                         | 1.45498600  | 1.13219600  |                                                                                      |             |
| O  | -1.45500400                                                                         | -1.45507600 | -1.13218300 |                                                                                      |             |
| C  | -1.87660900                                                                         | -1.86742500 | -0.00000300 |                                                                                      |             |
| O  | -1.45495900                                                                         | -1.45510100 | 1.13217100  |                                                                                      |             |
| C  | 2.97705600                                                                          | 2.89854300  | 0.00003400  |                                                                                      |             |
| H  | 2.91929800                                                                          | 3.51889500  | 0.89597000  |                                                                                      |             |
| H  | 3.94238200                                                                          | 2.37980700  | 0.00297400  |                                                                                      |             |
| H  | 2.92269500                                                                          | 3.51556400  | -0.89838200 |                                                                                      |             |
| C  | -2.97707700                                                                         | 2.89853800  | 0.00002100  |                                                                                      |             |
| H  | -3.94244100                                                                         | 2.37987400  | -0.00139300 |                                                                                      |             |
| H  | -2.92177200                                                                         | 3.51641900  | 0.89779800  |                                                                                      |             |
| H  | -2.92015000                                                                         | 3.51804600  | -0.89654600 |                                                                                      |             |
|    |                                                                                     |             |             | <b>Ylide 12</b>                                                                      |             |
|    |                                                                                     |             |             |   |             |
|    |                                                                                     |             |             | Zero-point correction = 0.336209                                                     |             |
|    |                                                                                     |             |             | Thermal correction to Energy = 0.367621                                              |             |
|    |                                                                                     |             |             | Thermal correction to Enthalpy = 0.368752                                            |             |
|    |                                                                                     |             |             | Thermal correction to Gibbs Free Energy = 0.264054                                   |             |
|    |                                                                                     |             |             | E <sub>0</sub> = -1464.015909, E = -1463.984497,                                     |             |
|    |                                                                                     |             |             | H = -1463.983366, G = -1464.088064.                                                  |             |
|    |                                                                                     |             |             | Imaginary frequency = 0.                                                             |             |
|    |                                                                                     |             |             |  |             |
| C  | 3.90261283                                                                          | -4.36877107 | -1.26147169 |                                                                                      |             |
| O  | 4.35312583                                                                          | -4.58106607 | 1.33621031  |                                                                                      |             |
| O  | 5.34909283                                                                          | -2.60647207 | 0.10916031  |                                                                                      |             |
| S  | 4.19136983                                                                          | -3.52435907 | 0.30495031  |                                                                                      |             |
| N  | 2.77829683                                                                          | -2.73383707 | 0.59029931  |                                                                                      |             |
| C  | 1.68461883                                                                          | 0.88166793  | 0.68335131  |                                                                                      |             |
| C  | 2.81324983                                                                          | -1.39268007 | 0.54867831  |                                                                                      |             |
| C  | 1.72418883                                                                          | -0.58347607 | 0.80514031  |                                                                                      |             |
| C  | -2.89588717                                                                         | -2.11373307 | 0.60339331  |                                                                                      |             |
| C  | 1.35845783                                                                          | -2.12817107 | 3.31321231  |                                                                                      |             |
| N  | -0.60123317                                                                         | -1.21384907 | 0.44661231  |                                                                                      |             |
| N  | 0.50123883                                                                          | -1.23118007 | 1.16761331  |                                                                                      |             |
| N  | 0.31468683                                                                          | -1.94714707 | 2.30340331  |                                                                                      |             |
| C  | -0.94115117                                                                         | -2.41436007 | 2.28970331  |                                                                                      |             |
| C  | -1.52938317                                                                         | -1.92992507 | 1.11457531  |                                                                                      |             |
| C  | -3.30556617                                                                         | -1.45201607 | -0.56684269 |                                                                                      |             |
| C  | -4.60132417                                                                         | -1.62298107 | -1.05407569 |                                                                                      |             |

|   |             |             |             |   |             |             |             |
|---|-------------|-------------|-------------|---|-------------|-------------|-------------|
| C | 2.97715100  | -2.89845700 | -0.00002100 | C | -5.50433917 | -2.45338107 | -0.38190469 |
| H | 3.94247100  | -2.37970600 | 0.00227900  | C | -5.10249317 | -3.11395707 | 0.78311731  |
| H | 2.91978000  | -3.51846200 | 0.89617600  | C | -3.80694217 | -2.94655607 | 1.27421731  |
| H | 2.92242100  | -3.51582700 | -0.89817800 | C | 0.75095983  | 1.65385293  | 1.40638331  |
| C | -2.97705200 | -2.89856700 | 0.00004800  | C | 0.73674883  | 3.04589593  | 1.30966531  |
| H | -2.92015400 | -3.51805400 | 0.89663000  | C | 1.65962883  | 3.71137993  | 0.49661031  |
| H | -3.94238800 | -2.37984300 | 0.00147300  | C | 2.58855883  | 2.95930793  | -0.23043269 |
| H | -2.92181300 | -3.51645600 | -0.89772600 | C | 2.59392483  | 1.56634293  | -0.15102369 |
|   |             |             |             | H | 4.78522683  | -4.97594507 | -1.47075669 |
|   |             |             |             | H | 3.75537483  | -3.61766707 | -2.03842669 |
|   |             |             |             | H | 3.01766383  | -4.99672307 | -1.15477769 |
|   |             |             |             | H | 3.75332683  | -0.88599107 | 0.32428531  |
|   |             |             |             | H | 2.10452283  | -2.82470707 | 2.92727331  |
|   |             |             |             | H | 1.81791483  | -1.16109907 | 3.51919731  |
|   |             |             |             | H | 0.87775283  | -2.51778407 | 4.20830631  |
|   |             |             |             | H | -1.31530317 | -3.03172207 | 3.09072231  |
|   |             |             |             | H | -2.60820617 | -0.80584107 | -1.08891569 |
|   |             |             |             | H | -4.90589417 | -1.10610707 | -1.95903169 |
|   |             |             |             | H | -6.51246417 | -2.58499207 | -0.76298369 |
|   |             |             |             | H | -5.79602417 | -3.76172307 | 1.31043131  |
|   |             |             |             | H | -3.51177517 | -3.47134307 | 2.17751631  |
|   |             |             |             | H | 0.03156083  | 1.16604093  | 2.05776731  |
|   |             |             |             | H | 0.00515783  | 3.61163493  | 1.87986531  |
|   |             |             |             | H | 1.64952483  | 4.79462393  | 0.42372531  |
|   |             |             |             | H | 3.30254283  | 3.45691793  | -0.88080669 |
|   |             |             |             | H | 3.29947483  | 1.00662193  | -0.75671469 |

### Tetraazatetraene 13

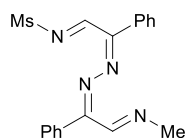

Zero-point correction = 0.332654

Thermal correction to Energy = 0.365534

Thermal correction to Enthalpy = 0.366665

Thermal correction to Gibbs Free Energy = 0.258298

$E_0 = -1464.007942$ ,  $E = -1463.975062$ ,

$H = -1463.973931$ ,  $G = -1464.082298$ .

Imaginary frequency = 0.

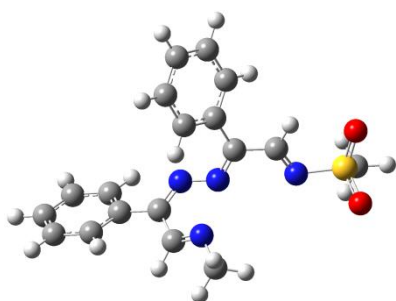

|   |            |             |             |
|---|------------|-------------|-------------|
| C | 5.15820056 | -2.21986206 | -1.88401838 |
| O | 5.09301456 | -2.73911006 | 0.73439362  |
| O | 5.48257156 | -0.34742706 | -0.00358138 |
| S | 4.81178956 | -1.64882506 | -0.21881338 |
| N | 3.10619256 | -1.49514506 | -0.29102038 |

### Dihydrotriazine 14

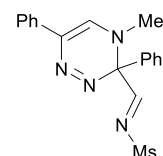

Zero-point correction = 0.334433

Thermal correction to Energy = 0.366132

Thermal correction to Enthalpy = 0.367263

Thermal correction to Gibbs Free Energy = 0.262741

$E_0 = -1464.002104$ ,  $E = -1463.970406$ ,

$H = -1463.969275$ ,  $G = -1464.073796$ .

Imaginary frequency = 0.

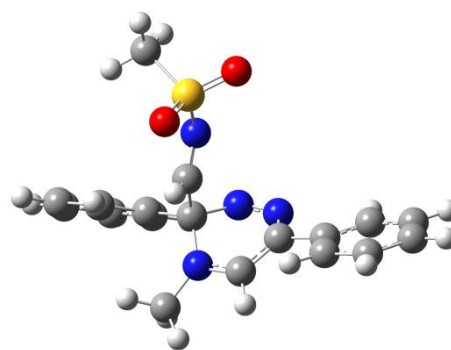

|   |             |            |             |
|---|-------------|------------|-------------|
| C | -2.33120077 | 3.69109812 | -0.23117138 |
| O | 0.30434323  | 3.31326112 | -0.46501538 |
| O | -0.77094877 | 2.89203512 | 1.79166262  |
| S | -0.85074077 | 2.83975012 | 0.31655562  |

|   |             |             |             |   |             |             |             |
|---|-------------|-------------|-------------|---|-------------|-------------|-------------|
| C | 0.78521556  | 1.35594994  | 0.36909662  | N | -1.19292977 | 1.24196312  | -0.24682038 |
| C | 2.64123356  | -0.33742906 | 0.02994362  | C | -2.94955177 | -1.33519788 | 0.11538062  |
| C | 1.20002156  | -0.03851606 | 0.07357562  | C | -1.12726677 | 0.32233612  | 0.63451862  |
| C | -3.20728244 | -1.44873106 | -0.24346538 | C | -1.44078277 | -1.13716788 | 0.25519662  |
| C | -0.26082944 | -3.06410406 | 3.30701762  | C | 2.64832223  | -1.22686788 | 0.16855962  |
| N | -0.90033644 | -0.85776006 | -0.33707438 | C | -1.58836677 | -2.98524888 | 2.06825762  |
| N | 0.39532356  | -1.03917506 | -0.12969538 | N | 0.50031823  | -1.49784888 | -1.00630738 |
| N | -0.51505244 | -2.15274606 | 2.20411862  | N | -0.76048777 | -1.46965288 | -1.05772038 |
| C | -1.54345444 | -2.35530006 | 1.47793662  | N | -0.84037377 | -2.00071588 | 1.27685962  |
| C | -1.82531544 | -1.52177106 | 0.28598162  | C | 0.50743423  | -1.96175388 | 1.28850862  |
| C | -3.43777144 | -1.13388706 | -1.59622138 | C | 1.19259023  | -1.45304288 | 0.19168462  |
| C | -4.73654644 | -1.05958606 | -2.09495838 | C | 3.33276723  | -0.88491288 | 1.34999862  |
| C | -5.83039444 | -1.29513606 | -1.25266338 | C | 4.71514323  | -0.68531988 | 1.34417462  |
| C | -5.61390944 | -1.60473406 | 0.09243762  | C | 5.44015723  | -0.80314488 | 0.15472062  |
| C | -4.31257944 | -1.68316006 | 0.59441062  | C | 4.76608623  | -1.12326788 | -1.02949438 |
| C | -0.27795844 | 1.62265394  | 1.25022962  | C | 3.38704723  | -1.33503488 | -1.02551238 |
| C | -0.66305044 | 2.93796494  | 1.51549762  | C | -3.83329277 | -0.72061488 | 1.01681062  |
| C | 0.00371456  | 4.00401294  | 0.90423862  | C | -5.21118577 | -0.91840388 | 0.90676062  |
| C | 1.06605156  | 3.74982694  | 0.03042762  | C | -5.72369077 | -1.73322188 | -0.10718438 |
| C | 1.45938356  | 2.43652994  | -0.23013138 | C | -4.84914177 | -2.34698788 | -1.00740938 |
| H | 6.22994856  | -2.42250406 | -1.92519638 | C | -3.46934977 | -2.14923888 | -0.89943638 |
| H | 4.88438756  | -1.43185206 | -2.58614838 | H | -3.18886777 | 3.27569712  | 0.29873762  |
| H | 4.58184756  | -3.12779006 | -2.06115338 | H | -2.42367977 | 3.55397112  | -1.30846238 |
| H | 3.31225656  | 0.48393394  | 0.29651662  | H | -2.19174277 | 4.74436912  | 0.01886962  |
| H | 0.73024356  | -3.50982606 | 3.16916062  | H | -0.90314577 | 0.52626012  | 1.68767462  |
| H | -0.22318744 | -2.48951606 | 4.23885762  | H | -2.38076777 | -2.50098088 | 2.64002162  |
| H | -1.00835844 | -3.86481506 | 3.40126062  | H | -2.02676977 | -3.75185988 | 1.42399262  |
| H | -2.24900744 | -3.17204806 | 1.67850962  | H | -0.88865377 | -3.46345488 | 2.75455262  |
| H | -2.59010144 | -0.95432106 | -2.24900838 | H | 1.01539123  | -2.44871088 | 2.11475862  |
| H | -4.89759844 | -0.82209006 | -3.14231338 | H | 2.77954323  | -0.75203888 | 2.27552162  |
| H | -6.84197044 | -1.23810006 | -1.64338238 | H | 5.22165923  | -0.42159688 | 2.26826062  |
| H | -6.45611944 | -1.78221206 | 0.75435562  | H | 6.51370323  | -0.63955188 | 0.14814262  |
| H | -4.16521244 | -1.90887706 | 1.64583962  | H | 5.31763223  | -1.21372188 | -1.96114538 |
| H | -0.78083744 | 0.80231794  | 1.74945262  | H | 2.87306223  | -1.59265188 | -1.94499038 |
| H | -1.48026644 | 3.12938594  | 2.20441862  | H | -3.45756277 | -0.08702388 | 1.81534262  |
| H | -0.29871244 | 5.02633294  | 1.11062462  | H | -5.88087677 | -0.43528488 | 1.61178062  |
| H | 1.58773656  | 4.57252294  | -0.44902538 | H | -6.79518977 | -1.88620388 | -0.19492838 |
| H | 2.27833256  | 2.25310094  | -0.91975138 | H | -5.23779577 | -2.98010688 | -1.79952138 |
|   |             |             |             | H | -2.79421477 | -2.61690588 | -1.60568938 |

### Betaine 15

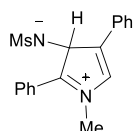

Zero-point correction = 0.326121

Thermal correction to Energy = 0.354858

Thermal correction to Enthalpy = 0.355989

Thermal correction to Gibbs Free Energy = 0.261151

$E_0 = -1354.530564$ ,  $E = -1354.501828$ ,

$H = -1354.500696$ ,  $G = -1354.595535$ .

Imaginary frequency = 0.

### Diazo ylide *syn*-16

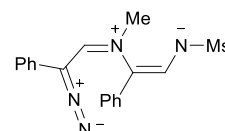

Zero-point correction = 0.333374

Thermal correction to Energy = 0.366117

Thermal correction to Enthalpy = 0.367248

Thermal correction to Gibbs Free Energy = 0.260683

$E_0 = -1463.990987$ ,  $E = -1463.958243$ ,

$H = -1463.957112$ ,  $G = -1464.063678$ .

Imaginary frequency = 0.

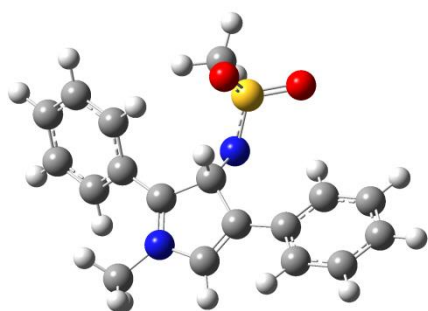

|   |             |             |             |
|---|-------------|-------------|-------------|
| C | -1.65924036 | 3.01938771  | -0.66953568 |
| O | 0.94519464  | 3.07044771  | -0.46819668 |
| O | -0.35371636 | 2.14645271  | 1.48610732  |
| S | -0.18676136 | 2.20506471  | -0.00817268 |
| N | -0.15875236 | 0.75971771  | -0.69772568 |
| C | -2.63573336 | -0.97525329 | 0.12523232  |
| C | -0.05237036 | -0.37939529 | 0.17576332  |
| C | -1.22660336 | -1.34631329 | 0.07060932  |
| C | 2.57103264  | -0.95140929 | 0.04902532  |
| C | -1.49625036 | -3.83508929 | -0.11813168 |
| N | -0.75782336 | -2.56646329 | -0.07687068 |
| C | 0.66680864  | -2.56931529 | -0.12861568 |
| C | 1.14905364  | -1.31741229 | -0.00460168 |
| C | 3.51456664  | -1.87514629 | 0.54744232  |
| C | 4.87243164  | -1.56262329 | 0.57823932  |
| C | 5.31728864  | -0.31716029 | 0.11938432  |
| C | 4.39074264  | 0.60964971  | -0.36582568 |
| C | 3.02891764  | 0.30080971  | -0.40307468 |
| C | -3.04933136 | 0.00447071  | 1.05067132  |
| C | -4.39264536 | 0.36694371  | 1.13132332  |
| C | -5.33250736 | -0.21407229 | 0.27331532  |
| C | -4.92469836 | -1.16163829 | -0.67099568 |
| C | -3.58697936 | -1.54691729 | -0.74369068 |
| H | -2.54146836 | 2.46814671  | -0.34376868 |
| H | -1.58678836 | 3.01862671  | -1.75798768 |
| H | -1.67514936 | 4.04228771  | -0.28893968 |
| H | -0.03381336 | -0.07949629 | 1.24645832  |
| H | -2.48942836 | -3.69907529 | 0.30396632  |
| H | -1.57160136 | -4.18444529 | -1.15058068 |
| H | -0.94352536 | -4.56755029 | 0.47091932  |
| H | 1.16915664  | -3.51690329 | -0.25664468 |
| H | 3.17941864  | -2.83250929 | 0.93500232  |
| H | 5.58177064  | -2.28504529 | 0.97138232  |
| H | 6.37479964  | -0.07119729 | 0.14763232  |
| H | 4.72627064  | 1.57996471  | -0.72023968 |
| H | 2.31974264  | 1.02383171  | -0.78632368 |
| H | -2.32121536 | 0.47250871  | 1.70467432  |
| H | -4.70446336 | 1.10894771  | 1.85953832  |
| H | -6.37651236 | 0.07764871  | 0.33357432  |
| H | -5.64611936 | -1.59784429 | -1.35453468 |
| H | -3.27782136 | -2.25910929 | -1.50065068 |

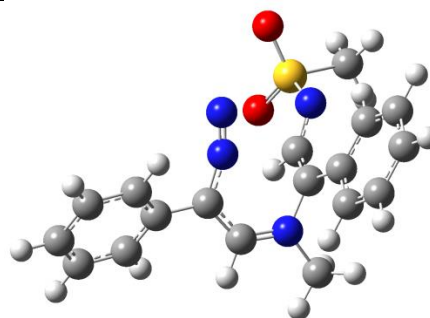

|   |             |             |             |
|---|-------------|-------------|-------------|
| C | 5.28169011  | -1.24878601 | 1.00880854  |
| O | 3.60374111  | -1.84136901 | -0.95112746 |
| O | 2.86807511  | -2.28846701 | 1.42568754  |
| S | 3.57042411  | -1.39335601 | 0.46290554  |
| N | 3.02565811  | 0.16794599  | 0.50311054  |
| C | 1.73015811  | 2.95797799  | 0.94666254  |
| C | 2.06242111  | 0.43379199  | 1.39083754  |
| C | 1.42954211  | 1.66137399  | 1.56000454  |
| C | -2.69812389 | 0.52394199  | 0.65433354  |
| C | 0.72263211  | 1.99469199  | 3.95310554  |
| N | -0.42145589 | 0.88067099  | -0.08626346 |
| N | -0.02591989 | 0.76743599  | -1.14558546 |
| N | 0.38415011  | 1.64358999  | 2.56355154  |
| C | -0.83993589 | 1.27899099  | 2.22746654  |
| C | -1.28904189 | 0.89835099  | 0.95696454  |
| C | -3.44054889 | -0.21548501 | 1.59169754  |
| C | -4.77368589 | -0.54058401 | 1.33449954  |
| C | -5.37573289 | -0.15635401 | 0.13283754  |
| C | -4.63497989 | 0.56073499  | -0.81124846 |
| C | -3.30673189 | 0.90358999  | -0.55295446 |
| C | 2.78819611  | 3.11462499  | 0.01949254  |
| C | 3.05181911  | 4.35600699  | -0.56295246 |
| C | 2.27920611  | 5.47760399  | -0.24829746 |
| C | 1.22672911  | 5.33888499  | 0.66326154  |
| C | 0.95391011  | 4.10314099  | 1.24790754  |
| H | 5.28908411  | -0.89674501 | 2.04106754  |
| H | 5.79352411  | -0.54425301 | 0.35281154  |
| H | 5.72838611  | -2.24204901 | 0.93464154  |
| H | 1.68988711  | -0.37926001 | 2.02140154  |
| H | 1.39449811  | 1.23621499  | 4.36380054  |
| H | 1.22925311  | 2.96191799  | 3.96477454  |
| H | -0.18346089 | 2.04931099  | 4.55815954  |
| H | -1.58582889 | 1.28905599  | 3.01555654  |
| H | -2.97679489 | -0.55317601 | 2.51347254  |
| H | -5.33417989 | -1.11120101 | 2.06877554  |
| H | -6.40940989 | -0.41957601 | -0.06892046 |
| H | -5.09134989 | 0.86292899  | -1.74884946 |
| H | -2.75244289 | 1.47636099  | -1.29052646 |
| H | 3.39545711  | 2.25648199  | -0.23607846 |
| H | 3.87210711  | 4.44292299  | -1.27047046 |
| H | 2.49058211  | 6.44032499  | -0.70406046 |
| H | 0.61052511  | 6.19619199  | 0.92004454  |
| H | 0.12339711  | 4.03033099  | 1.94267554  |



### Diazo ylide *anti*-16

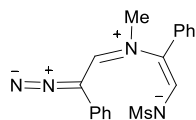

Zero-point correction = 0.333778

Thermal correction to Energy = 0.366445

Thermal correction to Enthalpy = 0.367576

Thermal correction to Gibbs Free Energy = 0.261073

$E_0 = -1463.986736$ ,  $E = -1463.954070$ ,

$H = -1463.952939$ ,  $G = -1464.059441$ .

Imaginary frequency = 0.

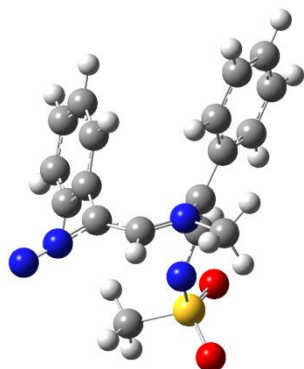

|   |             |             |             |
|---|-------------|-------------|-------------|
| C | -4.05766296 | -0.32844915 | -1.01045233 |
| O | -3.89509296 | -2.50398315 | 0.46828867  |
| O | -2.56088196 | -2.41816115 | -1.67634133 |
| S | -3.04017796 | -1.70932715 | -0.45387133 |
| N | -1.83769996 | -1.01426215 | 0.41512567  |
| C | 1.93504704  | -1.05245415 | 0.19291767  |
| C | -0.58262696 | -1.17624815 | -0.04909133 |
| C | 0.55748104  | -0.79478315 | 0.62654367  |
| C | -0.13520796 | 2.21337785  | -0.09779433 |
| C | 0.63740604  | -1.18263715 | 3.07206667  |
| N | -1.26934996 | 2.90775685  | 1.88286267  |
| N | -1.90491196 | 3.74316785  | 2.30554667  |
| N | 0.37830804  | -0.25076515 | 1.95286767  |
| C | -0.22144896 | 0.89179685  | 2.20983867  |
| C | -0.53593496 | 1.94373985  | 1.31616767  |
| C | -1.11382696 | 2.37122685  | -1.09019033 |
| C | -0.74086196 | 2.68060785  | -2.39936033 |
| C | 0.61023404  | 2.83520285  | -2.72486933 |
| C | 1.58726804  | 2.68974185  | -1.73505233 |
| C | 1.21783704  | 2.39134985  | -0.42230533 |
| C | 2.23708204  | -1.90740615 | -0.89391633 |
| C | 3.55176004  | -2.12514215 | -1.29974733 |
| C | 4.62134004  | -1.51752315 | -0.62917333 |
| C | 4.34528504  | -0.68189715 | 0.45530567  |
| C | 3.02733104  | -0.44841315 | 0.85534767  |
| H | -3.47251396 | 0.27723885  | -1.70256933 |
| H | -4.36012596 | 0.25282285  | -0.13882733 |
| H | -4.93027396 | -0.75117415 | -1.51186633 |
| H | -0.44120496 | -1.65539015 | -1.01804133 |
| H | -0.11882496 | -1.97189215 | 3.05402567  |
| H | 1.62455904  | -1.62592015 | 2.94005067  |

### Diazo imidazoline *syn*-17

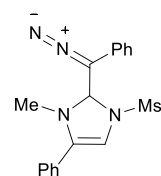

Zero-point correction = 0.334666

Thermal correction to Energy = 0.366659

Thermal correction to Enthalpy = 0.367790

Thermal correction to Gibbs Free Energy = 0.263459

$E_0 = -1463.993329$ ,  $E = -1463.961335$ ,

$H = -1463.960204$ ,  $G = -1464.064535$ .

Imaginary frequency = 0.

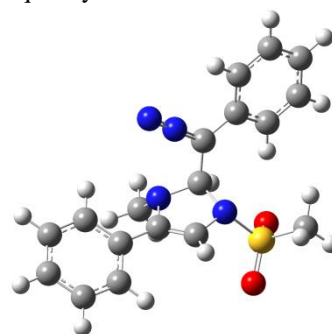

|   |             |             |             |
|---|-------------|-------------|-------------|
| C | 2.26667976  | 3.56111023  | -1.52133817 |
| O | 1.93732976  | 3.18563423  | 1.09316983  |
| O | 0.02833376  | 4.21365023  | -0.24566317 |
| S | 1.14553176  | 3.25670523  | -0.15245217 |
| N | 0.57504676  | 1.64744123  | -0.51633717 |
| C | -2.89658724 | 0.33201923  | -0.21551917 |
| C | -0.79572324 | 1.55717323  | -0.92313417 |
| C | -1.48594524 | 0.73645423  | -0.10368017 |
| C | 2.99328576  | -0.66757077 | -0.11827017 |
| C | -1.00894924 | 0.38586823  | 2.30230783  |
| N | 0.83120876  | -1.60796277 | -0.46505917 |
| N | 0.23357876  | -2.51075777 | -0.84095017 |
| N | -0.63486024 | 0.18329823  | 0.89199183  |
| C | 0.73422076  | 0.57547823  | 0.53293983  |
| C | 1.52837576  | -0.60230177 | -0.01825217 |
| C | 3.79832076  | 0.36115523  | 0.41456783  |
| C | 5.19117976  | 0.28842223  | 0.33615783  |
| C | 5.81865776  | -0.80067177 | -0.27351817 |
| C | 5.02934876  | -1.82513877 | -0.80824617 |
| C | 3.63909276  | -1.76196677 | -0.73496817 |
| C | -3.85371524 | 1.22368723  | -0.73448517 |
| C | -5.18569324 | 0.83276323  | -0.87370017 |
| C | -5.58846824 | -0.44956477 | -0.48372117 |
| C | -4.64727824 | -1.33893277 | 0.04426083  |
| C | -3.31200124 | -0.95330877 | 0.17745283  |
| H | 1.69699576  | 3.51089623  | -2.44978417 |
| H | 3.04831376  | 2.80189423  | -1.49625617 |
| H | 2.68163876  | 4.55946123  | -1.37225017 |
| H | -1.12320724 | 2.03130623  | -1.83623517 |
| H | -0.93515124 | 1.43984023  | 2.60670383  |

|   |             |             |             |   |             |             |             |
|---|-------------|-------------|-------------|---|-------------|-------------|-------------|
| H | 0.60399604  | -0.64997715 | 4.02313467  | H | -2.03580624 | 0.05053423  | 2.45214983  |
| H | -0.50214796 | 1.04678685  | 3.24803467  | H | -0.35538824 | -0.21825177 | 2.93580383  |
| H | -2.16182096 | 2.24613985  | -0.83806633 | H | 1.26290076  | 0.98841923  | 1.39319883  |
| H | -1.50363296 | 2.79722685  | -3.16304133 | H | 3.34970376  | 1.22366523  | 0.89358683  |
| H | 0.90008504  | 3.07288385  | -3.74389233 | H | 5.78558276  | 1.09431023  | 0.75736883  |
| H | 2.63703904  | 2.81616385  | -1.98125333 | H | 6.90146276  | -0.85161177 | -0.33223817 |
| H | 1.97708604  | 2.29510085  | 0.34611167  | H | 5.49686476  | -2.68025877 | -1.28797817 |
| H | 1.44050404  | -2.41943715 | -1.42314233 | H | 3.05416576  | -2.57114277 | -1.16168317 |
| H | 3.74309204  | -2.78729815 | -2.13985833 | H | -3.55346424 | 2.22913423  | -1.01369917 |
| H | 5.64476904  | -1.69716215 | -0.94413033 | H | -5.91206524 | 1.53340923  | -1.27496417 |
| H | 5.15695504  | -0.19929115 | 0.99315967  | H | -6.62697724 | -0.75017477 | -0.58597817 |
| H | 2.84597404  | 0.22124985  | 1.69078867  | H | -4.95084124 | -2.33637677 | 0.34855683  |
|   |             |             |             | H | -2.58168924 | -1.65197277 | 0.57286083  |

### Diazo imidazoline *anti*-17

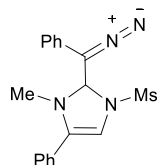

Zero-point correction = 0.334951

Thermal correction to Energy = 0.366792

Thermal correction to Enthalpy = 0.367923

Thermal correction to Gibbs Free Energy = 0.264674

$E_0 = -1463.992797$ ,  $E = -1463.960956$ ,

$H = -1463.959825$ ,  $G = -1464.063074$ .

Imaginary frequency = 0.

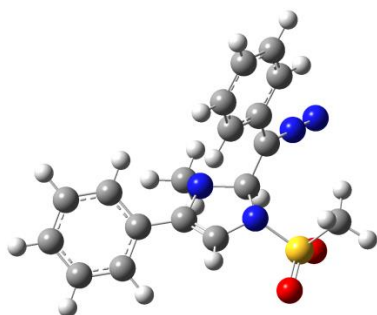

|   |             |             |             |
|---|-------------|-------------|-------------|
| C | -2.53873716 | -3.04885077 | -1.51532471 |
| O | -1.36220516 | -4.13049377 | 0.60733229  |
| O | -0.19096216 | -4.30164577 | -1.64718171 |
| S | -1.01766916 | -3.53691677 | -0.69948871 |
| N | -0.22995116 | -2.02251177 | -0.46938471 |
| C | 3.18597984  | -0.67416677 | 0.00673529  |
| C | 1.15600784  | -1.93127077 | -0.80746071 |
| C | 1.79778484  | -1.16035077 | 0.09299329  |
| C | -1.79456716 | 0.78487223  | -0.00052871 |
| C | 1.31069784  | -0.69346877 | 2.49282429  |
| N | -2.47329316 | -0.62804077 | 1.80078429  |
| N | -3.25262216 | -0.84736177 | 2.61222529  |
| N | 0.89931584  | -0.69685977 | 1.08570029  |
| C | -0.40813216 | -1.34212977 | 0.85303429  |
| C | -1.58452516 | -0.37820877 | 0.87667029  |
| C | -0.85591716 | 1.11108523  | -1.00066471 |
| C | -1.05943316 | 2.21362023  | -1.83262271 |

### Complex 18

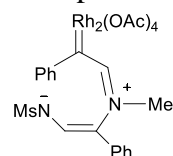

Zero-point correction = 0.535378

Thermal correction to Energy = 0.596199

Thermal correction to Enthalpy = 0.597330

Thermal correction to Gibbs Free Energy = 0.427290

$E_0 = -2489.602611$ ,  $E = -2489.541791$ ,

$H = -2489.540660$ ,  $G = -2489.710700$ .

Imaginary frequency = 0.

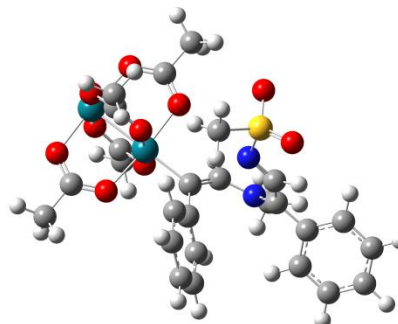

|   |             |             |             |
|---|-------------|-------------|-------------|
| C | 0.33758748  | 3.32562774  | 1.92728568  |
| O | 0.79254948  | 3.46801874  | -0.69618332 |
| O | 2.79004648  | 3.39313374  | 0.85895968  |
| S | 1.41088548  | 2.95949974  | 0.54329968  |
| N | 1.27503748  | 1.24596774  | 0.48189268  |
| C | 3.96173848  | -1.28273426 | -0.04938332 |
| C | 2.40019348  | 0.62531874  | 0.32974768  |
| C | 2.57836248  | -0.76061226 | -0.05990032 |
| C | 0.17473548  | -1.15029226 | 2.16071968  |
| C | 1.88721848  | -2.54496626 | -1.59623932 |
| N | 1.57977248  | -1.51108826 | -0.56854632 |
| C | 0.21837148  | -1.32590826 | -0.34294932 |
| C | -0.44235852 | -1.03443726 | 0.83501968  |
| C | -0.06325252 | -0.18316826 | 3.15956068  |
| C | 0.50729248  | -0.30849626 | 4.42658368  |
| C | 1.28776848  | -1.42513526 | 4.74543968  |
| C | 1.48953348  | -2.42134026 | 3.78250068  |
| C | 0.94714648  | -2.28329226 | 2.50530568  |

|   |             |             |             |    |             |             |             |
|---|-------------|-------------|-------------|----|-------------|-------------|-------------|
| C | -2.19527416 | 3.01614923  | -1.69438071 | C  | 5.04228448  | -0.50883326 | -0.52129332 |
| C | -3.13330816 | 2.70010923  | -0.70608771 | C  | 6.34372948  | -1.00796026 | -0.47381132 |
| C | -2.93824316 | 1.60124223  | 0.12978529  | C  | 6.59252248  | -2.28027126 | 0.05152668  |
| C | 4.20638284  | -1.52567377 | -0.45394071 | C  | 5.52928648  | -3.05547026 | 0.52715568  |
| C | 5.51648184  | -1.06044477 | -0.58025471 | C  | 4.22576648  | -2.56439026 | 0.47548668  |
| C | 5.83320084  | 0.25749523  | -0.23428171 | H  | 0.80193848  | 2.94143174  | 2.83581168  |
| C | 4.82708484  | 1.10904323  | 0.23425829  | H  | -0.62568652 | 2.84936874  | 1.73937768  |
| C | 3.51431684  | 0.64950623  | 0.35356229  | H  | 0.24469348  | 4.41264874  | 1.96631568  |
| H | -2.27931616 | -2.56449977 | -2.45639171 | H  | 3.34429848  | 1.16558674  | 0.43609068  |
| H | -3.08321416 | -2.36924277 | -0.85928571 | H  | 1.12353948  | -2.46624726 | -2.37114232 |
| H | -3.10954816 | -3.96344877 | -1.68536771 | H  | 2.87030848  | -2.37025926 | -2.02593932 |
| H | 1.50017484  | -2.29139377 | -1.76382171 | H  | 1.83819948  | -3.54073826 | -1.15265432 |
| H | 1.39333084  | -1.71331077 | 2.89998629  | H  | -0.37227552 | -1.53900526 | -1.22706832 |
| H | 2.27395284  | -0.19408477 | 2.59430029  | H  | -0.70236452 | 0.65891374  | 2.92716368  |
| H | 0.57591784  | -0.13655777 | 3.07972829  | H  | 0.32513048  | 0.45810274  | 5.17490568  |
| H | -0.59127116 | -2.10129477 | 1.62753529  | H  | 1.71752548  | -1.52870226 | 5.73757268  |
| H | 0.03508284  | 0.51125623  | -1.13360471 | H  | 2.06842948  | -3.30735126 | 4.02813168  |
| H | -0.31972616 | 2.44350923  | -2.59426471 | H  | 1.08994848  | -3.07417126 | 1.77527668  |
| H | -2.34744516 | 3.87247123  | -2.34417471 | H  | 4.86652448  | 0.46882374  | -0.95838732 |
| H | -4.02331616 | 3.31031323  | -0.58207571 | H  | 7.16219648  | -0.40466526 | -0.85409932 |
| H | -3.68452416 | 1.38046523  | 0.88716429  | H  | 7.60720648  | -2.66461326 | 0.09060968  |
| H | 3.97084584  | -2.55683177 | -0.70001271 | H  | 5.71517448  | -4.03999026 | 0.94531368  |
| H | 6.29231784  | -1.73156677 | -0.93705871 | H  | 3.41244048  | -3.16598626 | 0.86671268  |
| H | 6.85420984  | 0.61610023  | -0.32497471 | Rh | -2.46991752 | -0.73373726 | 0.61958068  |
| H | 5.06254784  | 2.13506223  | 0.50189629  | Rh | -4.90482752 | -0.47417426 | 0.27907368  |
| H | 2.73453684  | 1.32122723  | 0.69894629  | O  | -5.16905952 | -1.46695126 | 2.07682068  |
|   |             |             |             | C  | -4.15461252 | -1.86500926 | 2.73221868  |
|   |             |             |             | O  | -2.93287852 | -1.70129826 | 2.39381568  |
|   |             |             |             | O  | -4.87331852 | -2.28419226 | -0.72094532 |
|   |             |             |             | C  | -3.77506152 | -2.90620426 | -0.85743332 |
|   |             |             |             | O  | -2.63832252 | -2.52165526 | -0.41187332 |
|   |             |             |             | O  | -4.45363952 | 0.50120474  | -1.49292932 |
|   |             |             |             | C  | -3.24107652 | 0.64866374  | -1.84337632 |
|   |             |             |             | O  | -2.21867752 | 0.25000574  | -1.18606432 |
|   |             |             |             | O  | -4.78033452 | 1.31331974  | 1.30559768  |
|   |             |             |             | C  | -3.65656652 | 1.71551374  | 1.73789068  |
|   |             |             |             | O  | -2.54011052 | 1.10339574  | 1.60317368  |
|   |             |             |             | C  | -2.96741152 | 1.33278774  | -3.16374932 |
|   |             |             |             | H  | -2.09860752 | 1.98900874  | -3.07763132 |
|   |             |             |             | H  | -2.73981352 | 0.57092674  | -3.91771932 |
|   |             |             |             | H  | -3.84093752 | 1.89863574  | -3.49051832 |
|   |             |             |             | C  | -3.78937352 | -4.20572226 | -1.63007732 |
|   |             |             |             | H  | -4.80584552 | -4.59381426 | -1.70733432 |
|   |             |             |             | H  | -3.40398952 | -4.02345226 | -2.63937932 |
|   |             |             |             | H  | -3.13787452 | -4.93997526 | -1.15065632 |
|   |             |             |             | C  | -4.40580952 | -2.62510226 | 4.01534168  |
|   |             |             |             | H  | -5.36408152 | -2.33457126 | 4.44932668  |
|   |             |             |             | H  | -4.44094552 | -3.69667726 | 3.78823668  |
|   |             |             |             | H  | -3.59606952 | -2.45564626 | 4.72743268  |
|   |             |             |             | C  | -3.62178352 | 3.04676674  | 2.45482268  |
|   |             |             |             | H  | -4.61091452 | 3.29512874  | 2.84221168  |
|   |             |             |             | H  | -2.89165652 | 3.02856074  | 3.26660068  |
|   |             |             |             | H  | -3.32271452 | 3.82533574  | 1.74408668  |

### Dihydropyrazine 19

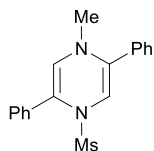

Zero-point correction = 0.325124

Thermal correction to Energy = 0.354560

Thermal correction to Enthalpy = 0.355691

Thermal correction to Gibbs Free Energy = 0.257849

$E_0 = -1354.545996$ ,  $E = -1354.516561$ ,

$H = -1354.515430$ ,  $G = -1354.613272$ .

Imaginary frequency = 0.

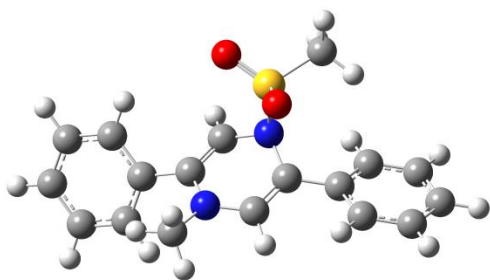

|   |             |             |             |
|---|-------------|-------------|-------------|
| C | 2.28020990  | 2.76336742  | -0.47757195 |
| O | 1.44401590  | 1.72833342  | 1.82624005  |
| O | -0.24201010 | 2.94702442  | 0.34801405  |
| S | 0.92916390  | 2.05294742  | 0.47611005  |
| N | 0.55039790  | 0.53916442  | -0.46634495 |
| C | -3.11463210 | -0.44410958 | -0.20974895 |
| C | -0.85032210 | 0.41145042  | -0.73506095 |
| C | -1.65638610 | -0.33515058 | 0.06018805  |
| C | 2.50057490  | -1.00026658 | -0.17349895 |
| C | -1.77582910 | -1.63832258 | 2.22466705  |
| N | -1.06775210 | -1.13555158 | 1.04425905  |
| C | 0.28976790  | -1.38497358 | 0.94040105  |
| C | 1.10035490  | -0.64612258 | 0.14197605  |
| C | 3.30353790  | -1.71446558 | 0.73802105  |
| C | 4.61327090  | -2.06887758 | 0.41308905  |
| C | 5.15867890  | -1.71019458 | -0.82482695 |
| C | 4.37711990  | -0.98881158 | -1.73254295 |
| C | 3.06551090  | -0.63424258 | -1.41006995 |
| C | -3.88910510 | 0.71982742  | -0.33986395 |
| C | -5.24987610 | 0.63598342  | -0.64816195 |
| C | -5.85369310 | -0.61171758 | -0.82602495 |
| C | -5.08963310 | -1.77754358 | -0.69763395 |
| C | -3.73057110 | -1.69527158 | -0.39219695 |
| H | 2.54629390  | 3.70197242  | 0.01220405  |
| H | 1.92516590  | 2.93738542  | -1.49319495 |
| H | 3.11662190  | 2.06513742  | -0.46489795 |
| H | -1.22777110 | 0.90815142  | -1.62010395 |
| H | -1.51729410 | -1.04588258 | 3.10909605  |

### TS1

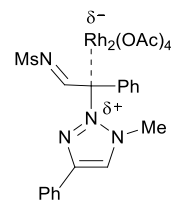

Zero-point correction = 0.547520

Thermal correction to Energy = 0.609124

Thermal correction to Enthalpy = 0.610255

Thermal correction to Gibbs Free Energy = 0.437707

$E_0 = -2599.116926$ ,  $E = -2599.055322$ ,

$H = -2599.054191$ ,  $G = -2599.226740$ .

Imaginary frequency = 1.

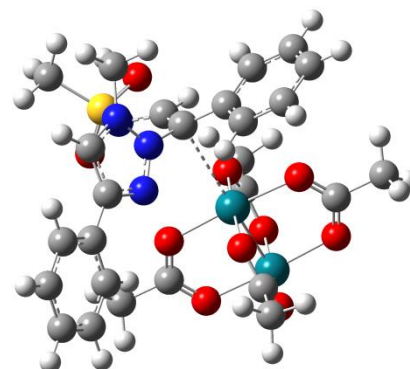

|   |             |             |             |
|---|-------------|-------------|-------------|
| C | -4.31970180 | -1.42805830 | -0.51418493 |
| C | -3.44094380 | 3.33280070  | 0.90171107  |
| N | -2.38975380 | 0.02261070  | 0.00826107  |
| N | -2.18349480 | 1.26194570  | 0.38275607  |
| N | -3.36267780 | 1.92027570  | 0.52097907  |
| C | -4.34509380 | 1.06511270  | 0.21842607  |
| C | -3.72257880 | -0.14792230 | -0.10698093 |
| C | -3.52023680 | -2.42252130 | -1.10369093 |
| C | -4.08604180 | -3.63738430 | -1.49207693 |
| C | -5.45190680 | -3.87391330 | -1.29992493 |
| C | -6.25124480 | -2.88747430 | -0.71323793 |
| C | -5.68963580 | -1.67112830 | -0.32047093 |
| H | -2.96143080 | 3.47381670  | 1.87077807  |
| H | -2.94683780 | 3.93204670  | 0.13657907  |
| H | -4.49635280 | 3.59136070  | 0.96456107  |
| H | -5.38059580 | 1.36744670  | 0.23936307  |
| H | -2.46291080 | -2.23604030 | -1.25883193 |
| H | -3.46063980 | -4.39835330 | -1.94930193 |
| H | -5.88974980 | -4.81983530 | -1.60454093 |
| H | -7.31087280 | -3.06497730 | -0.55605893 |
| H | -6.31971680 | -0.92058930 | 0.14745307  |
| C | -0.90137180 | 1.88661570  | 0.61468207  |
| C | -0.44285380 | 2.68166370  | -0.43634593 |
| N | -1.11930880 | 2.84300370  | -1.57171593 |
| S | -0.40379280 | 3.75951870  | -2.74691193 |
| O | -0.07527980 | 2.91357970  | -3.92199893 |
| O | 0.69339420  | 4.62361670  | -2.22991793 |
| C | -1.76209780 | 4.83156970  | -3.24062693 |
| C | -0.48248980 | 1.96848970  | 2.02779507  |

|                                           |             |             |             |                                           |             |             |             |
|-------------------------------------------|-------------|-------------|-------------|-------------------------------------------|-------------|-------------|-------------|
| H                                         | -2.85090910 | -1.58428358 | 2.06919605  | C                                         | 0.38562320  | 2.98422670  | 2.48404007  |
| H                                         | -1.49688210 | -2.68115858 | 2.40266805  | C                                         | 0.77384320  | 3.04991370  | 3.82195807  |
| H                                         | 0.63833990  | -2.26899458 | 1.46403205  | C                                         | 0.29087620  | 2.12312570  | 4.75324207  |
| H                                         | 2.90984990  | -1.97690958 | 1.71536105  | C                                         | -0.58425480 | 1.12297070  | 4.31974307  |
| H                                         | 5.21399390  | -2.61477158 | 1.13507805  | C                                         | -0.96188280 | 1.04230470  | 2.97783307  |
| H                                         | 6.18001890  | -1.98239658 | -1.07379995 | H                                         | 0.50810920  | 3.19431270  | -0.29002893 |
| H                                         | 4.78724790  | -0.70231558 | -2.69697295 | H                                         | -1.40279080 | 5.43231970  | -4.07824893 |
| H                                         | 2.46263890  | -0.07884058 | -2.12114695 | H                                         | -2.03357580 | 5.46769970  | -2.39742293 |
| H                                         | -3.42238610 | 1.68801142  | -0.18771295 | H                                         | -2.60182580 | 4.20726670  | -3.54735593 |
| H                                         | -5.83702110 | 1.54469342  | -0.74244895 | H                                         | 0.75539120  | 3.73634170  | 1.79473207  |
| H                                         | -6.91145010 | -0.67719358 | -1.06319295 | H                                         | 1.44532820  | 3.84264270  | 4.14068807  |
| H                                         | -5.55092110 | -2.75000258 | -0.84261395 | H                                         | 0.58673820  | 2.18427370  | 5.79630607  |
| H                                         | -3.13927410 | -2.60275658 | -0.30969895 | H                                         | -0.97071680 | 0.39227470  | 5.02511207  |
|                                           |             |             |             | H                                         | -1.62030480 | 0.23761870  | 2.66530407  |
|                                           |             |             |             | Rh                                        | 3.06184520  | -1.51834630 | -1.00003493 |
|                                           |             |             |             | Rh                                        | 1.29964520  | -0.05630030 | -0.28008393 |
|                                           |             |             |             | O                                         | 2.32832820  | 1.49096970  | -1.16648493 |
|                                           |             |             |             | C                                         | 3.43155820  | 1.25626170  | -1.76128293 |
|                                           |             |             |             | O                                         | 3.97718320  | 0.10674770  | -1.86670293 |
|                                           |             |             |             | O                                         | 2.37015820  | 0.25148870  | 1.45517407  |
|                                           |             |             |             | C                                         | 3.49035320  | -0.33429030 | 1.61547007  |
|                                           |             |             |             | O                                         | 4.03652220  | -1.12034030 | 0.77049607  |
|                                           |             |             |             | O                                         | 0.40231720  | -1.70635830 | 0.58108707  |
|                                           |             |             |             | C                                         | 0.97074620  | -2.84377630 | 0.50844607  |
|                                           |             |             |             | O                                         | 2.07135420  | -3.08000330 | -0.09496093 |
|                                           |             |             |             | O                                         | 0.35063920  | -0.44422630 | -2.06647793 |
|                                           |             |             |             | C                                         | 0.89402320  | -1.23212230 | -2.90705193 |
|                                           |             |             |             | O                                         | 2.00386020  | -1.84223230 | -2.73490593 |
|                                           |             |             |             | C                                         | 0.30599820  | -4.00073830 | 1.21475807  |
|                                           |             |             |             | H                                         | 0.54839720  | -4.94224430 | 0.71881507  |
|                                           |             |             |             | H                                         | 0.68409320  | -4.04704030 | 2.24233607  |
|                                           |             |             |             | H                                         | -0.77479380 | -3.85518030 | 1.25420207  |
|                                           |             |             |             | C                                         | 4.21874020  | -0.10422730 | 2.91727007  |
|                                           |             |             |             | H                                         | 3.92761420  | 0.85128570  | 3.35570407  |
|                                           |             |             |             | H                                         | 3.94805720  | -0.90304730 | 3.61684907  |
|                                           |             |             |             | H                                         | 5.29841820  | -0.14181230 | 2.76034907  |
|                                           |             |             |             | C                                         | 4.16142720  | 2.43264970  | -2.35992993 |
|                                           |             |             |             | H                                         | 3.45280020  | 3.20770270  | -2.65536493 |
|                                           |             |             |             | H                                         | 4.83404720  | 2.84990570  | -1.60181793 |
|                                           |             |             |             | H                                         | 4.76300020  | 2.11384270  | -3.21294193 |
|                                           |             |             |             | C                                         | 0.18611020  | -1.44331730 | -4.22265993 |
|                                           |             |             |             | H                                         | 0.55370220  | -0.70036830 | -4.93912593 |
|                                           |             |             |             | H                                         | 0.40301020  | -2.43746530 | -4.61774193 |
|                                           |             |             |             | H                                         | -0.88925480 | -1.30147730 | -4.10544093 |
| <b>TS2</b>                                |             |             |             | <b>TS3</b>                                |             |             |             |
|                                           |             |             |             |                                           |             |             |             |
| Zero-point correction = 0.332330          |             |             |             | Zero-point correction = 0.543427          |             |             |             |
| Thermal correction to Energy = 0.364043   |             |             |             | Thermal correction to Energy = 0.606495   |             |             |             |
| Thermal correction to Enthalpy = 0.365174 |             |             |             | Thermal correction to Enthalpy = 0.607626 |             |             |             |

Thermal correction to Gibbs Free Energy = 0.260622

$E_0 = -1463.987030$ ,  $E = -1463.955317$ ,

$H = -1463.954186$ ,  $G = -1464.058738$ .

Imaginary frequency = 1.

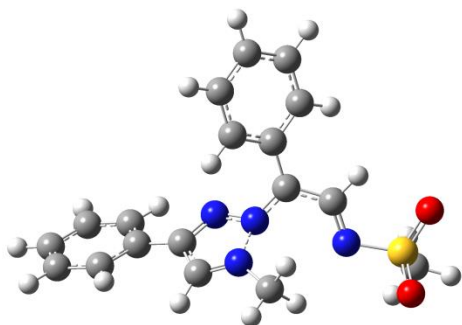

|   |             |             |             |
|---|-------------|-------------|-------------|
| C | 4.65750081  | -3.47084904 | -1.59625855 |
| O | 4.83209581  | -3.53405504 | 1.05360745  |
| O | 5.38258481  | -1.36677304 | -0.12640355 |
| S | 4.53019381  | -2.58065004 | -0.03918555 |
| N | 2.89516981  | -2.22842404 | 0.02971945  |
| C | 0.94254281  | 0.97012496  | 0.30872145  |
| C | 2.57853481  | -0.95284504 | 0.09426945  |
| C | 1.24667181  | -0.47535804 | 0.20308645  |
| C | -3.24632219 | -2.08169004 | 0.11872345  |
| C | 0.91399581  | -2.77582004 | 2.84459545  |
| N | -0.93931919 | -1.31636704 | -0.12233855 |
| N | 0.28115281  | -1.41298804 | 0.31315545  |
| N | -0.06450919 | -2.19865504 | 1.94721445  |
| C | -1.29560919 | -2.53458204 | 1.77504045  |
| C | -1.86014319 | -1.94093604 | 0.58887845  |
| C | -3.57550919 | -1.83389604 | -1.22668355 |
| C | -4.89242719 | -1.96231304 | -1.66559055 |
| C | -5.90121819 | -2.34318604 | -0.77296455 |
| C | -5.58279019 | -2.59027704 | 0.56548645  |
| C | -4.26608619 | -2.45862604 | 1.01016845  |
| C | -0.12694319 | 1.43031096  | 1.10106945  |
| C | -0.40763819 | 2.79393896  | 1.20502845  |
| C | 0.37589181  | 3.73201996  | 0.52574345  |
| C | 1.44125481  | 3.28871896  | -0.26469855 |
| C | 1.71860481  | 1.92522796  | -0.37756455 |
| H | 5.69095081  | -3.81150804 | -1.68235155 |
| H | 4.40414581  | -2.78923404 | -2.40886355 |
| H | 3.97087981  | -4.31693704 | -1.56467655 |
| H | 3.36709481  | -0.19690004 | 0.07897745  |
| H | 1.59715781  | -3.40350504 | 2.26735145  |
| H | 1.49111181  | -1.97481804 | 3.31265245  |
| H | 0.41940981  | -3.37645204 | 3.61513445  |
| H | -1.80583219 | -3.26858004 | 2.39553945  |
| H | -2.79449519 | -1.54411104 | -1.92179555 |
| H | -5.13152719 | -1.76962104 | -2.70715855 |
| H | -6.92562519 | -2.44517704 | -1.11810655 |
| H | -6.35906819 | -2.88030104 | 1.26701745  |
| H | -4.04093819 | -2.63849404 | 2.05703745  |
| H | -0.73457519 | 0.72096696  | 1.65330445  |

Thermal correction to Gibbs Free Energy = 0.429537

$E_0 = -2599.087298$ ,  $E = -2599.024229$ ,

$H = -2599.023098$ ,  $G = -2599.201188$ .

Imaginary frequency = 1.

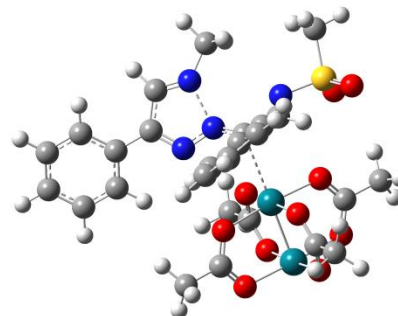

|   |             |             |             |
|---|-------------|-------------|-------------|
| C | -3.21917619 | -0.63442745 | -0.60985525 |
| C | -1.47497219 | 4.05849455  | -0.24314325 |
| N | -1.03016119 | 0.27813455  | -0.03002925 |
| N | -0.26856119 | 1.31882955  | 0.02202775  |
| N | -1.60761419 | 2.62576355  | -0.07808525 |
| C | -2.60546219 | 1.88478855  | -0.39819225 |
| C | -2.29965219 | 0.47499755  | -0.31901125 |
| C | -2.71865619 | -1.90448145 | -0.95173525 |
| C | -3.59248919 | -2.95734145 | -1.22030125 |
| C | -4.97724819 | -2.76056245 | -1.15631425 |
| C | -5.48223719 | -1.50129145 | -0.81823025 |
| C | -4.61096019 | -0.44466545 | -0.54523325 |
| H | -1.04422719 | 4.48925755  | 0.66364075  |
| H | -0.79900719 | 4.25625555  | -1.07757625 |
| H | -2.45253519 | 4.51169955  | -0.44099825 |
| H | -3.54638619 | 2.28444255  | -0.77171825 |
| H | -1.64585519 | -2.05553645 | -1.00916925 |
| H | -3.19296619 | -3.93166145 | -1.48604325 |
| H | -5.65570019 | -3.58137945 | -1.36892425 |
| H | -6.55464419 | -1.34031545 | -0.76152225 |
| H | -5.02128919 | 0.52191455  | -0.26842825 |
| C | 0.75808381  | 1.54530955  | 0.90250475  |
| C | 1.74693681  | 2.47914355  | 0.43980275  |
| N | 1.68390281  | 3.09578855  | -0.71120425 |
| S | 2.97044181  | 4.12193955  | -1.07043725 |
| O | 3.56945381  | 3.69670555  | -2.35449425 |
| O | 3.88788381  | 4.32233255  | 0.07902275  |
| C | 2.10255581  | 5.66897055  | -1.36644325 |
| C | 0.55460681  | 1.33914455  | 2.36975875  |
| C | 1.04383581  | 2.27958755  | 3.29897975  |
| C | 0.83975281  | 2.11177955  | 4.67084475  |
| C | 0.12479681  | 1.01028255  | 5.14901375  |
| C | -0.37900719 | 0.07697655  | 4.23682075  |
| C | -0.16467819 | 0.23568455  | 2.86645075  |
| H | 2.58343781  | 2.66613555  | 1.11459975  |
| H | 2.85972681  | 6.40056455  | -1.65473925 |
| H | 1.60091881  | 5.97410755  | -0.44752625 |
| H | 1.38845581  | 5.51599455  | -2.17594025 |
| H | 1.57582181  | 3.16209455  | 2.95894075  |
| H | 1.22941681  | 2.85343555  | 5.36259475  |

|                                                                                                                                                                                                                                                                                                       |             |            |             |                                                                                                                                                                                                                                                                                                       |             |             |             |
|-------------------------------------------------------------------------------------------------------------------------------------------------------------------------------------------------------------------------------------------------------------------------------------------------------|-------------|------------|-------------|-------------------------------------------------------------------------------------------------------------------------------------------------------------------------------------------------------------------------------------------------------------------------------------------------------|-------------|-------------|-------------|
| H                                                                                                                                                                                                                                                                                                     | -1.23642019 | 3.12308196 | 1.82544745  | H                                                                                                                                                                                                                                                                                                     | -0.04102119 | 0.88301455  | 6.21489775  |
| H                                                                                                                                                                                                                                                                                                     | 0.15721481  | 4.79247496 | 0.60764645  | H                                                                                                                                                                                                                                                                                                     | -0.93427919 | -0.78669745 | 4.59246375  |
| H                                                                                                                                                                                                                                                                                                     | 2.05228781  | 4.00448196 | -0.80723955 | H                                                                                                                                                                                                                                                                                                     | -0.52982819 | -0.51727345 | 2.17941175  |
| H                                                                                                                                                                                                                                                                                                     | 2.53143081  | 1.60255096 | -1.02118655 | Rh                                                                                                                                                                                                                                                                                                    | 4.02248081  | -2.32031245 | -0.29577825 |
|                                                                                                                                                                                                                                                                                                       |             |            |             | Rh                                                                                                                                                                                                                                                                                                    | 2.51729281  | -0.51146345 | 0.20496675  |
|                                                                                                                                                                                                                                                                                                       |             |            |             | O                                                                                                                                                                                                                                                                                                     | 3.96299981  | 0.76554655  | -0.51571425 |
|                                                                                                                                                                                                                                                                                                       |             |            |             | C                                                                                                                                                                                                                                                                                                     | 5.06735281  | 0.29972755  | -0.95111425 |
|                                                                                                                                                                                                                                                                                                       |             |            |             | O                                                                                                                                                                                                                                                                                                     | 5.37142781  | -0.93932045 | -0.99669325 |
|                                                                                                                                                                                                                                                                                                       |             |            |             | O                                                                                                                                                                                                                                                                                                     | 3.38903081  | -0.40642145 | 2.06941675  |
|                                                                                                                                                                                                                                                                                                       |             |            |             | C                                                                                                                                                                                                                                                                                                     | 4.33283781  | -1.20955445 | 2.36950775  |
|                                                                                                                                                                                                                                                                                                       |             |            |             | O                                                                                                                                                                                                                                                                                                     | 4.80802381  | -2.10810345 | 1.59736975  |
|                                                                                                                                                                                                                                                                                                       |             |            |             | O                                                                                                                                                                                                                                                                                                     | 1.18921281  | -1.93425845 | 0.89388275  |
|                                                                                                                                                                                                                                                                                                       |             |            |             | C                                                                                                                                                                                                                                                                                                     | 1.51103881  | -3.16675345 | 0.87111975  |
|                                                                                                                                                                                                                                                                                                       |             |            |             | O                                                                                                                                                                                                                                                                                                     | 2.61295481  | -3.63171845 | 0.42520375  |
|                                                                                                                                                                                                                                                                                                       |             |            |             | O                                                                                                                                                                                                                                                                                                     | 1.76000881  | -0.71427945 | -1.70037725 |
|                                                                                                                                                                                                                                                                                                       |             |            |             | C                                                                                                                                                                                                                                                                                                     | 2.23457981  | -1.61200045 | -2.47130025 |
|                                                                                                                                                                                                                                                                                                       |             |            |             | O                                                                                                                                                                                                                                                                                                     | 3.16716281  | -2.42874645 | -2.16530725 |
|                                                                                                                                                                                                                                                                                                       |             |            |             | C                                                                                                                                                                                                                                                                                                     | 0.52397181  | -4.15499045 | 1.44401675  |
|                                                                                                                                                                                                                                                                                                       |             |            |             | H                                                                                                                                                                                                                                                                                                     | 0.62313281  | -5.12353445 | 0.95064475  |
|                                                                                                                                                                                                                                                                                                       |             |            |             | H                                                                                                                                                                                                                                                                                                     | 0.74264681  | -4.28972545 | 2.50940475  |
|                                                                                                                                                                                                                                                                                                       |             |            |             | H                                                                                                                                                                                                                                                                                                     | -0.49571219 | -3.77850345 | 1.34857775  |
|                                                                                                                                                                                                                                                                                                       |             |            |             | C                                                                                                                                                                                                                                                                                                     | 4.91782281  | -1.10947745 | 3.75732675  |
|                                                                                                                                                                                                                                                                                                       |             |            |             | H                                                                                                                                                                                                                                                                                                     | 4.75276481  | -0.11436645 | 4.17268775  |
|                                                                                                                                                                                                                                                                                                       |             |            |             | H                                                                                                                                                                                                                                                                                                     | 4.42036181  | -1.84267945 | 4.40208475  |
|                                                                                                                                                                                                                                                                                                       |             |            |             | H                                                                                                                                                                                                                                                                                                     | 5.98382281  | -1.34459245 | 3.73712475  |
|                                                                                                                                                                                                                                                                                                       |             |            |             | C                                                                                                                                                                                                                                                                                                     | 6.09761581  | 1.29312755  | -1.42525625 |
|                                                                                                                                                                                                                                                                                                       |             |            |             | H                                                                                                                                                                                                                                                                                                     | 5.60560581  | 2.13345355  | -1.91849325 |
|                                                                                                                                                                                                                                                                                                       |             |            |             | H                                                                                                                                                                                                                                                                                                     | 6.63708581  | 1.68020055  | -0.55336925 |
|                                                                                                                                                                                                                                                                                                       |             |            |             | H                                                                                                                                                                                                                                                                                                     | 6.81393881  | 0.81134055  | -2.09253225 |
|                                                                                                                                                                                                                                                                                                       |             |            |             | C                                                                                                                                                                                                                                                                                                     | 1.62794481  | -1.74001345 | -3.84756025 |
|                                                                                                                                                                                                                                                                                                       |             |            |             | H                                                                                                                                                                                                                                                                                                     | 1.16701781  | -0.79942945 | -4.15243525 |
|                                                                                                                                                                                                                                                                                                       |             |            |             | H                                                                                                                                                                                                                                                                                                     | 2.38777481  | -2.04524045 | -4.56968925 |
|                                                                                                                                                                                                                                                                                                       |             |            |             | H                                                                                                                                                                                                                                                                                                     | 0.85397781  | -2.51531945 | -3.82070025 |
| <b>TS4</b><br>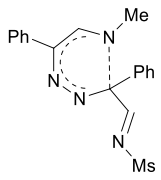                                                                                                                                                                                                     |             |            |             | <b>TS5</b><br>                                                                                                                                                                                                   |             |             |             |
| Zero-point correction = 0.332294<br>Thermal correction to Energy = 0.363809<br>Thermal correction to Enthalpy = 0.364940<br>Thermal correction to Gibbs Free Energy = 0.261776<br>E <sub>0</sub> = -1463.976830, E = -1463.945315,<br>H = -1463.944184, G = -1464.047348.<br>Imaginary frequency = 1. |             |            |             | Zero-point correction = 0.333762<br>Thermal correction to Energy = 0.364435<br>Thermal correction to Enthalpy = 0.365566<br>Thermal correction to Gibbs Free Energy = 0.265906<br>E <sub>0</sub> = -1463,973969, E = -1463,943296,<br>H = -1463,942165, G = -1464,041825.<br>Imaginary frequency = 1. |             |             |             |



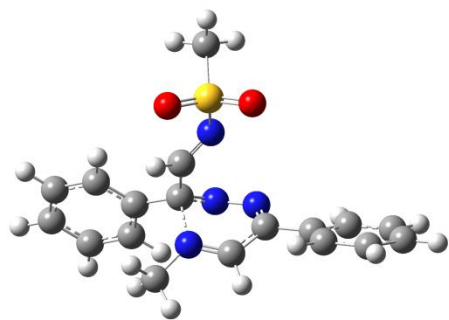

|   |             |             |             |
|---|-------------|-------------|-------------|
| C | -0.59838687 | 3.39984919  | -0.73038500 |
| O | 1.29160613  | 2.40907219  | 0.87987000  |
| O | -1.05839387 | 2.64857019  | 1.79750300  |
| S | -0.16358087 | 2.35226719  | 0.65843400  |
| N | -0.48936087 | 0.79619019  | -0.02191400 |
| C | -3.06336887 | -1.70744181 | 0.24102200  |
| C | -1.27250187 | 0.05726519  | 0.66450200  |
| C | -1.60892587 | -1.34937981 | 0.23262300  |
| C | 2.57869713  | -2.08533081 | 0.45161100  |
| C | -1.61018387 | -2.62945881 | 2.98979400  |
| N | 0.44407313  | -1.96145581 | -0.66823400 |
| N | -0.87498487 | -1.96077881 | -0.72318200 |
| N | -0.83523487 | -1.98791481 | 1.93467400  |
| C | 0.40632413  | -2.31337081 | 1.71692100  |
| C | 1.09910813  | -2.01534181 | 0.49158200  |
| C | 3.33229713  | -1.75750881 | 1.59330300  |
| C | 4.72822113  | -1.81309481 | 1.57052700  |
| C | 5.39801713  | -2.18856681 | 0.40295400  |
| C | 4.65794613  | -2.50703781 | -0.74239400 |
| C | 3.26441313  | -2.45842481 | -0.71979000 |
| C | -4.06138087 | -0.79847481 | 0.63007700  |
| C | -5.40698187 | -1.17618681 | 0.61823100  |
| C | -5.77252887 | -2.46466581 | 0.22281500  |
| C | -4.78449987 | -3.37750581 | -0.16474300 |
| C | -3.44222587 | -3.00271181 | -0.15470100 |
| H | -1.66442787 | 3.28850219  | -0.93046100 |
| H | 0.00240313  | 3.09606119  | -1.58757000 |
| H | -0.36341087 | 4.42268719  | -0.43032000 |
| H | -1.73342387 | 0.39888319  | 1.59437600  |
| H | -2.07297287 | -1.86668481 | 3.62148000  |
| H | -2.40807087 | -3.22679581 | 2.53745200  |
| H | -0.98212887 | -3.28643581 | 3.60175700  |
| H | 0.91264713  | -2.96207581 | 2.43695600  |
| H | 2.82887413  | -1.43529981 | 2.50074700  |
| H | 5.29010413  | -1.55131781 | 2.46246700  |
| H | 6.48310313  | -2.22904081 | 0.38294300  |
| H | 5.16904113  | -2.80088781 | -1.65491800 |
| H | 2.69343613  | -2.71157881 | -1.60631600 |
| H | -3.81149287 | 0.21262219  | 0.93241000  |
| H | -6.16643787 | -0.45943081 | 0.91500800  |
| H | -6.81839287 | -2.75656781 | 0.21544300  |
| H | -5.06027187 | -4.38118881 | -0.47385100 |
| H | -2.67480687 | -3.70555681 | -0.46042000 |

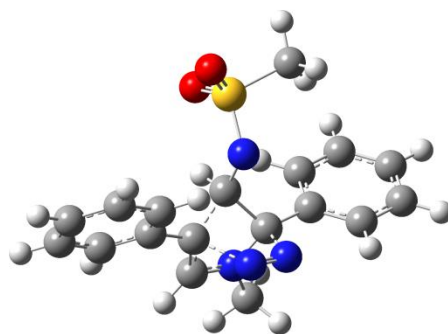

|   |             |             |             |
|---|-------------|-------------|-------------|
| C | 1.36329633  | 2.88163641  | 0.52618704  |
| O | -1.25827267 | 3.00675641  | 0.53561704  |
| O | -0.13114267 | 1.93030941  | -1.45270296 |
| S | -0.18970167 | 2.09753841  | 0.03528004  |
| N | -0.23940467 | 0.69734041  | 0.83448204  |
| C | 2.42742133  | -1.13021459 | 0.40660304  |
| C | -0.17220767 | -0.46961059 | 0.08880904  |
| C | 0.98311633  | -1.51242859 | 0.44870504  |
| C | -2.75962867 | -1.24754459 | 0.31446004  |
| C | 1.46129133  | -3.72491159 | -0.75373096 |
| N | -0.72533367 | -1.92415059 | 1.99389704  |
| N | 0.45806033  | -1.85329259 | 1.96978704  |
| N | 0.56963133  | -2.64894359 | -0.30584996 |
| C | -0.75968467 | -2.69642759 | -0.35332096 |
| C | -1.31284767 | -1.56647359 | 0.31724404  |
| C | -3.62420667 | -1.77688959 | -0.65880596 |
| C | -4.98323667 | -1.45769859 | -0.64753596 |
| C | -5.49505667 | -0.60399259 | 0.33449804  |
| C | -4.63965067 | -0.06668759 | 1.30117104  |
| C | -3.27961267 | -0.38136859 | 1.29096004  |
| C | 2.93970433  | -0.52587659 | -0.75378296 |
| C | 4.28257333  | -0.15150359 | -0.81819496 |
| C | 5.12609333  | -0.37154759 | 0.27561504  |
| C | 4.61941133  | -0.96722659 | 1.43306004  |
| C | 3.27593133  | -1.34686859 | 1.50155704  |
| H | 2.19166333  | 2.25786141  | 0.18875104  |
| H | 1.36939133  | 2.97449341  | 1.61293004  |
| H | 1.40093033  | 3.86659241  | 0.05700204  |
| H | -0.11137767 | -0.30902559 | -0.99886196 |
| H | 2.26683233  | -3.30231859 | -1.35368796 |
| H | 1.88231033  | -4.23746659 | 0.11445304  |
| H | 0.88048233  | -4.42592959 | -1.35189396 |
| H | -1.26557967 | -3.55110259 | -0.78423996 |
| H | -3.24072967 | -2.42675359 | -1.43967396 |
| H | -5.63848067 | -1.87201459 | -1.40781896 |
| H | -6.55209767 | -0.35513259 | 0.34252004  |
| H | -5.02926267 | 0.60284541  | 2.06203604  |
| H | -2.61517667 | 0.04521941  | 2.03354904  |
| H | 2.29133733  | -0.34118959 | -1.60499496 |
| H | 4.66630133  | 0.31597541  | -1.71972696 |
| H | 6.16992233  | -0.07686259 | 0.22598904  |
| H | 5.26736833  | -1.13849559 | 2.28717504  |
| H | 2.88937033  | -1.80621059 | 2.40357304  |



TS6

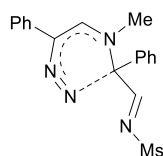

Zero-point correction = 0.332632

Thermal correction to Energy = 0.364579

Thermal correction to Enthalpy = 0.365710

Thermal correction to Gibbs Free Energy = 0.260927

$E_0 = -1463.982686$ ,  $E = -1463.50739$ ,

$H = -1463.949608$ ,  $G = -1464.054391$ .

Imaginary frequency = 1.

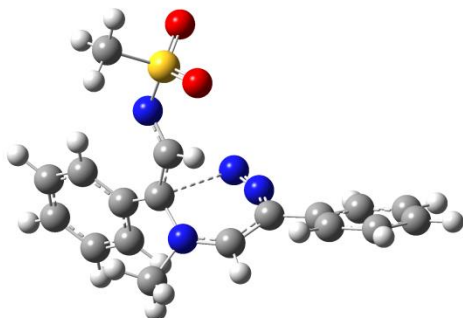

|   |             |             |             |
|---|-------------|-------------|-------------|
| C | -3.38028310 | 3.60674279  | 1.30418637  |
| O | -2.06099510 | 3.36981879  | -0.98120863 |
| O | -0.77632110 | 3.06395479  | 1.17285637  |
| S | -2.02896810 | 2.83280579  | 0.40126537  |
| N | -2.48603810 | 1.24049179  | 0.35509637  |
| C | -3.05207210 | -1.77002721 | 0.60594337  |
| C | -1.66095710 | 0.37557579  | 0.93582437  |
| C | -1.86363010 | -1.00924121 | 1.02449837  |
| C | 2.60835690  | -1.01371721 | 0.40901937  |
| C | -1.34793810 | -2.49051921 | 2.98068837  |
| N | 0.44742290  | -1.30305321 | -0.66726463 |
| N | -0.51039810 | -1.26020421 | -1.29239363 |
| N | -0.88489110 | -1.70982521 | 1.80396737  |
| C | 0.43842490  | -1.64258621 | 1.62567137  |
| C | 1.15850490  | -1.26794321 | 0.46638037  |
| C | 3.27652190  | -0.49377021 | 1.53122137  |
| C | 4.65274390  | -0.26177821 | 1.48707837  |
| C | 5.37707490  | -0.52184021 | 0.32022337  |
| C | 4.71425090  | -1.02390721 | -0.80483463 |
| C | 3.34340090  | -1.27743121 | -0.76111663 |
| C | -4.31527510 | -1.15976821 | 0.44584737  |
| C | -5.42575810 | -1.90820521 | 0.05415237  |
| C | -5.31365110 | -3.28122921 | -0.19014463 |
| C | -4.06804510 | -3.89905021 | -0.04305963 |
| C | -2.95342310 | -3.15436021 | 0.34371937  |
| H | -3.39246210 | 3.20921979  | 2.31964837  |
| H | -4.31282010 | 3.38304679  | 0.78547737  |
| H | -3.18886510 | 4.68132579  | 1.31034437  |
| H | -0.75237110 | 0.75296379  | 1.41421337  |
| H | -2.37331510 | -2.20823921 | 3.20883337  |
| H | -1.29452610 | -3.56321121 | 2.78633237  |
| H | -0.70699810 | -2.24495121 | 3.83065837  |

TS7

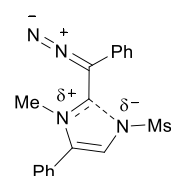

Zero-point correction = 0.332666

Thermal correction to Energy = 0.364510

Thermal correction to Enthalpy = 0.364510

Thermal correction to Gibbs Free Energy = 0.261880

$E_0 = -1463.973894$ ,  $E = -1463.942050$ ,

$H = -1463.940919$ ,  $G = -1464.044681$ .

Imaginary frequency = 1.

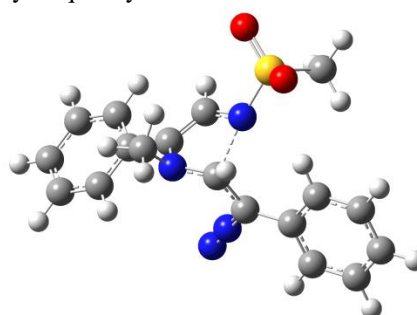

|   |             |             |             |
|---|-------------|-------------|-------------|
| C | 2.09663384  | 3.06378421  | -1.62137336 |
| O | 2.11131884  | 3.00464121  | 1.02744564  |
| O | 0.14449784  | 4.10066221  | -0.15052536 |
| S | 1.14172884  | 3.00186721  | -0.09357036 |
| N | 0.43223684  | 1.49949021  | -0.11193536 |
| C | -3.01635516 | 0.01811521  | -0.02257236 |
| C | -0.90194316 | 1.38900921  | -0.43500636 |
| C | -1.63570216 | 0.44456721  | 0.22555664  |
| C | 2.49446784  | -1.27806579 | 0.08793164  |
| C | -1.33752916 | 0.49049321  | 2.65892964  |
| N | 0.22811984  | -1.86059079 | -0.44455736 |
| N | -0.45663816 | -2.54719279 | -1.04162436 |
| N | -0.91601716 | -0.08714179 | 1.36397564  |
| C | 0.42928784  | -0.13585879 | 1.15085964  |
| C | 1.03899284  | -1.10245779 | 0.26273864  |
| C | 3.38305884  | -0.28332379 | 0.53797864  |
| C | 4.76230784  | -0.46170479 | 0.40645064  |
| C | 5.27940184  | -1.61669579 | -0.18598736 |
| C | 4.39979584  | -2.60152079 | -0.64781236 |
| C | 3.02167984  | -2.43860179 | -0.51047836 |
| C | -3.87931116 | 0.75027221  | -0.86643136 |
| C | -5.18529016 | 0.32370521  | -1.09683436 |
| C | -5.67363816 | -0.83971579 | -0.48775836 |
| C | -4.83308016 | -1.57074679 | 0.35462464  |
| C | -3.52052216 | -1.14988579 | 0.58334464  |
| H | 1.40887484  | 2.99656821  | -2.46511836 |
| H | 2.79768884  | 2.22895921  | -1.62055336 |
| H | 2.62696784  | 4.01776721  | -1.63043336 |
| H | -1.33048116 | 2.01769621  | -1.20949236 |
| H | -1.08682916 | 1.55735021  | 2.70991064  |
| H | -2.41677116 | 0.37366221  | 2.75620564  |
| H | -0.85036016 | -0.04851379 | 3.47367664  |

|                                                                                     |             |             |             |                                                                                      |             |             |             |
|-------------------------------------------------------------------------------------|-------------|-------------|-------------|--------------------------------------------------------------------------------------|-------------|-------------|-------------|
| H                                                                                   | 1.03697990  | -1.97962121 | 2.46711537  | H                                                                                    | 1.06358084  | 0.18691721  | 1.97064064  |
| H                                                                                   | 2.72116590  | -0.24578321 | 2.43047437  | H                                                                                    | 3.00907284  | 0.63913721  | 0.96864064  |
| H                                                                                   | 5.15399890  | 0.14086779  | 2.36209237  | H                                                                                    | 5.43208284  | 0.31633521  | 0.76082064  |
| H                                                                                   | 6.44527090  | -0.33130121 | 0.28575237  | H                                                                                    | 6.35211384  | -1.74736479 | -0.28985236 |
| H                                                                                   | 5.26667390  | -1.23057721 | -1.71652263 | H                                                                                    | 4.78544784  | -3.50495379 | -1.11078336 |
| H                                                                                   | 2.84514790  | -1.69237421 | -1.63268263 | H                                                                                    | 2.35985684  | -3.22438879 | -0.86248536 |
| H                                                                                   | -4.41670210 | -0.09726621 | 0.62440237  | H                                                                                    | -3.53331716 | 1.66404521  | -1.33916836 |
| H                                                                                   | -6.38673010 | -1.41377221 | -0.05795663 | H                                                                                    | -5.82864216 | 0.90655921  | -1.74988236 |
| H                                                                                   | -6.18133310 | -3.85889221 | -0.49461063 | H                                                                                    | -6.69323716 | -1.16680379 | -0.66774936 |
| H                                                                                   | -3.95868110 | -4.96193121 | -0.23940563 | H                                                                                    | -5.19420216 | -2.47609979 | 0.83430064  |
| H                                                                                   | -1.99286310 | -3.65363921 | 0.42922337  | H                                                                                    | -2.87446616 | -1.73457279 | 1.23045164  |
| <b>TS8</b>                                                                          |             |             |             | <b>TS9</b>                                                                           |             |             |             |
| 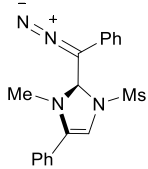   |             |             |             |   |             |             |             |
| Zero-point correction = 0.334452                                                    |             |             |             | Zero-point correction = 0.332545                                                     |             |             |             |
| Thermal correction to Energy = 0.365387                                             |             |             |             | Thermal correction to Energy = 0.364420                                              |             |             |             |
| Thermal correction to Enthalpy = 0.366518                                           |             |             |             | Thermal correction to Enthalpy = 0.365551                                            |             |             |             |
| Thermal correction to Gibbs Free Energy = 0.265858                                  |             |             |             | Thermal correction to Gibbs Free Energy = 0.261024                                   |             |             |             |
| $E_0 = -1463.986444$ , $E = -1463.955509$ ,                                         |             |             |             | $E_0 = -1463.969449$ , $E = -1463.937574$ ,                                          |             |             |             |
| $H = -1463.954378$ , $G = -1464.055038$ .                                           |             |             |             | $H = -1463.936443$ , $G = -1464.040970$ .                                            |             |             |             |
| Imaginary frequency = 1.                                                            |             |             |             | Imaginary frequency = 1.                                                             |             |             |             |
|  |             |             |             |  |             |             |             |
| C                                                                                   | -3.68945593 | -1.84961116 | -1.63150147 | C                                                                                    | -3.39339693 | -0.77694222 | -1.68265387 |
| O                                                                                   | -3.68250893 | -1.23939316 | 0.97006753  | O                                                                                    | -3.59202893 | -1.34539122 | 0.89823013  |
| O                                                                                   | -2.60866093 | -3.41943916 | 0.22044353  | O                                                                                    | -2.55346993 | -3.07275722 | -0.64851987 |
| S                                                                                   | -2.89604593 | -1.99237516 | -0.02668147 | S                                                                                    | -2.71599293 | -1.64904522 | -0.25722887 |
| N                                                                                   | -1.43610493 | -1.07070516 | -0.29295247 | N                                                                                    | -1.26073293 | -0.89745822 | 0.02728713  |
| C                                                                                   | 2.06913707  | -2.30163116 | -0.03467747 | C                                                                                    | 2.36320107  | -1.84055322 | 0.22762113  |
| C                                                                                   | -0.30675593 | -1.81571816 | -0.76204247 | C                                                                                    | -0.09254693 | -1.51470922 | -0.36658387 |
| C                                                                                   | 0.72366807  | -1.72095316 | 0.10533253  | C                                                                                    | 0.98678207  | -1.39111822 | 0.46040913  |
| C                                                                                   | 0.46202207  | 1.93623784  | 0.11824653  | C                                                                                    | 0.85172107  | 1.92755078  | 0.37246313  |
| C                                                                                   | 0.52228107  | -1.43503216 | 2.55976653  | C                                                                                    | 0.47652507  | -1.88139822 | 2.80584213  |
| N                                                                                   | -1.90661393 | 1.80063884  | 0.29217553  | N                                                                                    | -1.38281393 | 2.08902278  | 1.20483913  |
| N                                                                                   | -2.92855593 | 2.30616984  | 0.14925753  | N                                                                                    | -2.31657793 | 2.73799978  | 1.28415513  |
| N                                                                                   | 0.38368207  | -0.88536316 | 1.20115553  | N                                                                                    | 0.60862607  | -0.85231322 | 1.74965113  |
| C                                                                                   | -0.90664593 | -0.28047016 | 0.88096953  | C                                                                                    | -0.44960993 | 0.00982578  | 1.65411213  |
| C                                                                                   | -0.77094993 | 1.19488684  | 0.47687353  | C                                                                                    | -0.29758793 | 1.34874078  | 1.11968813  |
| C                                                                                   | 1.58282207  | 1.94630984  | 0.97006753  | C                                                                                    | 0.66194707  | 2.50182678  | -0.89544687 |
| C                                                                                   | 2.72418407  | 2.67536584  | 0.63092053  | C                                                                                    | 1.73534307  | 3.08071178  | -1.57606887 |
| C                                                                                   | 2.76486407  | 3.42277984  | -0.55108747 | C                                                                                    | 3.01051707  | 3.08326278  | -1.00321187 |
| C                                                                                   | 1.65170107  | 3.43210884  | -1.39657547 | C                                                                                    | 3.20543007  | 2.51153278  | 0.25850213  |

|   |             |             |             |   |             |             |             |
|---|-------------|-------------|-------------|---|-------------|-------------|-------------|
| C | 0.51430507  | 2.69086984  | -1.06904347 | C | 2.13267307  | 1.94452078  | 0.94832113  |
| C | 2.24409907  | -3.54098016 | -0.67770847 | C | 2.70233607  | -2.63088222 | -0.89230787 |
| C | 3.52006207  | -4.08097116 | -0.84253947 | C | 4.01241507  | -3.05629622 | -1.09984387 |
| C | 4.64129707  | -3.40060616 | -0.35449347 | C | 5.02540907  | -2.71302422 | -0.19530687 |
| C | 4.47657507  | -2.17346016 | 0.29581053  | C | 4.70489807  | -1.93425022 | 0.91897113  |
| C | 3.20193007  | -1.62637116 | 0.45406153  | C | 3.39312107  | -1.50084522 | 1.12667413  |
| H | -3.03604393 | -2.29195116 | -2.38432247 | H | -2.72594693 | -0.92646422 | -2.53228787 |
| H | -3.87001293 | -0.79418916 | -1.83203947 | H | -3.47455593 | 0.28043878  | -1.43040187 |
| H | -4.62606693 | -2.40573716 | -1.56375347 | H | -4.37696593 | -1.20500822 | -1.88452987 |
| H | -0.32331393 | -2.27600216 | -1.73943847 | H | -0.04933193 | -2.05220422 | -1.30838787 |
| H | -0.20265993 | -2.23626016 | 2.76274753  | H | -0.36212893 | -2.55602122 | 2.59225013  |
| H | 1.52908007  | -1.83576416 | 2.68325153  | H | 1.39722907  | -2.46274622 | 2.84650213  |
| H | 0.38140607  | -0.63285916 | 3.28839553  | H | 0.32623907  | -1.39294622 | 3.77072913  |
| H | -1.60590893 | -0.36577916 | 1.71504453  | H | -1.23228493 | -0.11022722 | 2.39822213  |
| H | 1.55325807  | 1.39193284  | 1.90041753  | H | -0.32351793 | 2.49055678  | -1.35210287 |
| H | 3.57886907  | 2.67163584  | 1.30154253  | H | 1.57534907  | 3.52170478  | -2.55539187 |
| H | 3.65205007  | 3.99432184  | -0.80701947 | H | 3.84603607  | 3.52926778  | -1.53427987 |
| H | 1.66965807  | 4.00766684  | -2.31757947 | H | 4.19188707  | 2.51637578  | 0.71241713  |
| H | -0.33755193 | 2.69043584  | -1.74341847 | H | 2.28239607  | 1.51955978  | 1.93465413  |
| H | 1.37551707  | -4.08711716 | -1.03315947 | H | 1.93839307  | -2.92311422 | -1.60560687 |
| H | 3.63798507  | -5.03903316 | -1.34025847 | H | 4.24323707  | -3.66379522 | -1.97038287 |
| H | 5.63333707  | -3.82528116 | -0.47646347 | H | 6.04502307  | -3.04866822 | -0.35881787 |
| H | 5.34199807  | -1.63760016 | 0.67475953  | H | 5.47739307  | -1.65575722 | 1.63034013  |
| H | 3.07855607  | -0.66339316 | 0.93817953  | H | 3.16476507  | -0.88423622 | 1.98935913  |

TS10

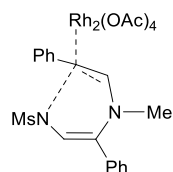

Zero-point correction = 0.534447

Thermal correction to Energy = 0.594574

Thermal correction to Enthalpy = 0.595705

Thermal correction to Gibbs Free Energy = 0.426395

$E_0 = -2489.592981$ ,  $E = -2489.532855$ ,

$H = -2489.531724$ ,  $G = -2489.701033$ .

Imaginary frequency = 1.

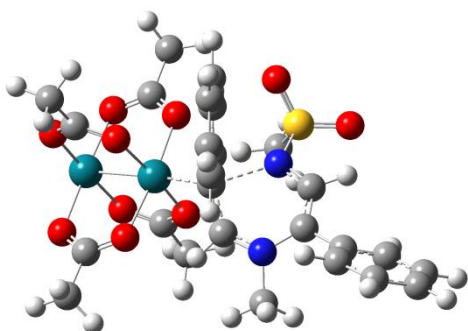

|   |             |             |             |
|---|-------------|-------------|-------------|
| C | -0.55166917 | 2.73838159  | -0.45812569 |
| O | 1.79503383  | 2.87900959  | 0.78848331  |
| O | -0.20509717 | 2.10919559  | 2.11202031  |
| S | 0.52335883  | 2.11576859  | 0.83325131  |
| N | 0.81718683  | 0.49100659  | 0.36914431  |
| C | 3.95395483  | -1.13761741 | -0.88627469 |

TS11

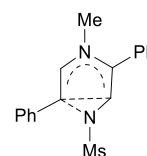

Zero-point correction = 0.323877

Thermal correction to Energy = 0.352430

Thermal correction to Enthalpy = 0.353561

Thermal correction to Gibbs Free Energy = 0.257474

$E_0 = -1354.494302$ ,  $E = -1354.465750$ ,

$H = -1354.464619$ ,  $G = -1354.560705$ .

Imaginary frequency = 1.

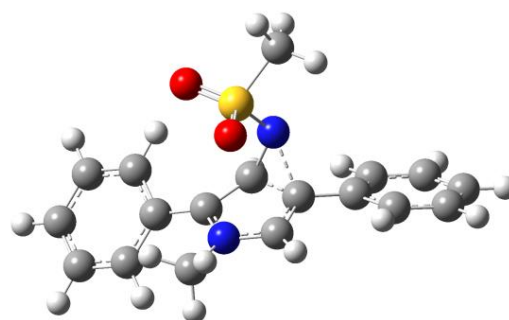

|   |             |             |             |
|---|-------------|-------------|-------------|
| C | 0.89075402  | 3.47563403  | -0.54269795 |
| O | -0.44516398 | 2.44203603  | 1.50873705  |
| O | -1.63045798 | 2.61195103  | -0.70788295 |
| S | -0.37207198 | 2.32943003  | 0.03000305  |
| N | 0.30250602  | 0.90893703  | -0.52510095 |
| C | -3.01359998 | -0.77385597 | -0.00201795 |

|    |             |             |             |   |             |             |             |
|----|-------------|-------------|-------------|---|-------------|-------------|-------------|
| C  | 2.07884583  | 0.22793159  | 0.02522331  | C | -0.48821898 | -0.35993297 | -0.48729795 |
| C  | 2.50461183  | -0.89091641 | -0.67781169 | C | -1.65109298 | -0.49940097 | 0.42390805  |
| C  | 0.01684283  | -1.83247041 | 1.46553431  | C | 2.09279902  | -0.90059097 | 0.03814605  |
| C  | 1.99091683  | -2.35063141 | -2.59743769 | C | -1.95562798 | -0.50067397 | 2.91927705  |
| N  | 1.56066583  | -1.67458641 | -1.34390369 | N | -1.16302698 | -0.56072297 | 1.68341405  |
| C  | 0.26786083  | -1.71659841 | -1.04184769 | C | 0.20104702  | -0.58439697 | 1.73868105  |
| C  | -0.38803117 | -1.26815341 | 0.16711731  | C | 0.72421902  | -0.49085497 | 0.42440605  |
| C  | -0.35842917 | -1.18945041 | 2.66447931  | C | 3.14288502  | -0.82146097 | 0.96940005  |
| C  | -0.02905817 | -1.74215141 | 3.89797531  | C | 4.43375602  | -1.22204397 | 0.62147705  |
| C  | 0.64516983  | -2.96967941 | 3.96693331  | C | 4.69857802  | -1.70557897 | -0.66424195 |
| C  | 0.99834583  | -3.63328841 | 2.78834931  | C | 3.66133502  | -1.78499497 | -1.59831295 |
| C  | 0.70076283  | -3.06426541 | 1.54818531  | C | 2.36900202  | -1.38660197 | -1.25005795 |
| C  | 4.79657183  | -0.10770641 | -1.34448769 | C | -3.47559598 | -0.20292897 | -1.21050895 |
| C  | 6.17100483  | -0.31696341 | -1.48170369 | C | -4.75550798 | -0.47703797 | -1.68926495 |
| C  | 6.72666883  | -1.56350241 | -1.17739369 | C | -5.61399298 | -1.32034597 | -0.97521095 |
| C  | 5.89868383  | -2.59779341 | -0.72741669 | C | -5.17004098 | -1.89929097 | 0.21864405  |
| C  | 4.52703183  | -2.38537541 | -0.57597969 | C | -3.88605698 | -1.64020397 | 0.69702805  |
| H  | -1.41681817 | 2.08189759  | -0.52504969 | H | 0.55909202  | 4.47188303  | -0.24495195 |
| H  | 0.01254783  | 2.75313059  | -1.39075769 | H | 0.96912702  | 3.39788103  | -1.62672495 |
| H  | -0.83566917 | 3.74915159  | -0.15728469 | H | 1.83487402  | 3.22133703  | -0.06064095 |
| H  | 2.84875783  | 0.95187059  | 0.28736031  | H | -0.57311198 | -0.82823197 | -1.46574895 |
| H  | 1.10517983  | -2.68784441 | -3.13130069 | H | -1.44701098 | 0.16436703  | 3.61723405  |
| H  | 2.55803183  | -1.65118541 | -3.21183569 | H | -2.94533298 | -0.10590597 | 2.70075005  |
| H  | 2.61629183  | -3.20826241 | -2.35173669 | H | -2.03872698 | -1.49666997 | 3.35996305  |
| H  | -0.36666517 | -2.15861841 | -1.80196669 | H | 0.71122902  | -0.54662097 | 2.68671605  |
| H  | -0.88103317 | -0.24219241 | 2.60649931  | H | 2.95552302  | -0.43904697 | 1.96789205  |
| H  | -0.30679517 | -1.22316241 | 4.81106531  | H | 5.23311502  | -1.15215597 | 1.35334605  |
| H  | 0.88967083  | -3.40456641 | 4.93190731  | H | 5.70312202  | -2.01693297 | -0.93481095 |
| H  | 1.51552783  | -4.58751241 | 2.83231431  | H | 3.85571702  | -2.16016197 | -2.59877295 |
| H  | 0.98152183  | -3.59064041 | 0.64135331  | H | 1.57378102  | -1.45648897 | -1.98523995 |
| H  | 4.37134983  | 0.85743059  | -1.60443369 | H | -2.83258698 | 0.48399403  | -1.75017495 |
| H  | 6.80414083  | 0.49133059  | -1.83598269 | H | -5.08785698 | -0.02069197 | -2.61721295 |
| H  | 7.79451283  | -1.72756441 | -1.28769069 | H | -6.61258798 | -1.52923297 | -1.34691095 |
| H  | 6.32255083  | -3.56640641 | -0.47864569 | H | -5.81914298 | -2.57199097 | 0.77178105  |
| H  | 3.90044683  | -3.18659441 | -0.19435569 | H | -3.55076298 | -2.14494597 | 1.59581205  |
| Rh | -2.46077917 | -1.00423041 | -0.21283269 |   |             |             |             |
| Rh | -4.86901317 | -0.85555041 | -0.71801769 |   |             |             |             |
| O  | -5.22415917 | -2.04884841 | 0.92712331  |   |             |             |             |
| C  | -4.23708117 | -2.46696441 | 1.61284431  |   |             |             |             |
| O  | -3.00726117 | -2.20704541 | 1.38654631  |   |             |             |             |
| O  | -4.66907517 | -2.54534541 | -1.89078669 |   |             |             |             |
| C  | -3.53068817 | -3.09703041 | -1.99746169 |   |             |             |             |
| O  | -2.45173417 | -2.68932741 | -1.44112569 |   |             |             |             |
| O  | -4.36104917 | 0.32468459  | -2.34265269 |   |             |             |             |
| C  | -3.13946917 | 0.56498859  | -2.59383269 |   |             |             |             |
| O  | -2.14297017 | 0.18234359  | -1.88663769 |   |             |             |             |
| O  | -4.93213717 | 0.81466559  | 0.49652431  |   |             |             |             |
| C  | -3.87163817 | 1.20008559  | 1.08275931  |   |             |             |             |
| O  | -2.71710617 | 0.66518159  | 0.95930031  |   |             |             |             |
| C  | -2.82093417 | 1.34925859  | -3.84614569 |   |             |             |             |
| H  | -1.96531517 | 2.00727259  | -3.68131869 |   |             |             |             |
| H  | -2.55603317 | 0.64527059  | -4.64321669 |   |             |             |             |
| H  | -3.68932117 | 1.92602659  | -4.16754169 |   |             |             |             |
| C  | -3.42180517 | -4.34738141 | -2.83941269 |   |             |             |             |

|   |             |             |             |
|---|-------------|-------------|-------------|
| H | -4.36671117 | -4.55745641 | -3.34114869 |
| H | -2.62454617 | -4.23031841 | -3.57890269 |
| H | -3.15483317 | -5.19267541 | -2.19689969 |
| C | -4.52823717 | -3.36018341 | 2.79724131  |
| H | -5.60236517 | -3.43353441 | 2.97024431  |
| H | -4.12151317 | -4.35831341 | 2.60507031  |
| H | -4.03077617 | -2.96790941 | 3.68838831  |
| C | -3.97960317 | 2.38210259  | 2.01732031  |
| H | -4.49596417 | 2.06391759  | 2.92963031  |
| H | -2.98959217 | 2.75539659  | 2.27994031  |
| H | -4.57945417 | 3.17020459  | 1.55510331  |

**Table S8.** Dihedral angles and cartesian coordinates of 1-methyl-4-phenyl-1*H*-1,2,3-triazole (**2a**) and 1,4-diphenyl-1*H*-1,2,3-triazole (DFT B3LYP/6-31+G(d,p)/Stuttgart RSC 1997 ECP, PCM for DCE).

|                                                                                                              |             |             |             |                                                                                                                                                                                               |             |             |             |
|--------------------------------------------------------------------------------------------------------------|-------------|-------------|-------------|-----------------------------------------------------------------------------------------------------------------------------------------------------------------------------------------------|-------------|-------------|-------------|
| <p style="text-align: center;"><math>\angle \text{N}^1\text{-C}^2\text{-C}^3\text{-C}^4 = 0^\circ</math></p> |             |             |             | <p style="text-align: center;"><math>\angle \text{C}^1\text{-C}^2\text{-N}^3\text{-N}^4 = 34^\circ</math><br/> <math>\angle \text{N}^5\text{-C}^6\text{-C}^7\text{-C}^8 = 11^\circ</math></p> |             |             |             |
| C                                                                                                            | 1.00937636  | -0.16387004 | -0.15873610 | C                                                                                                                                                                                             | 2.56290409  | -0.42534616 | -0.27916988 |
| C                                                                                                            | -3.96773564 | 0.55061096  | -0.15856010 | N                                                                                                                                                                                             | 0.67108609  | -1.99332016 | 0.13705812  |
| N                                                                                                            | -1.09539164 | -1.49723104 | -0.15888510 | N                                                                                                                                                                                             | -0.63320191 | -1.99840216 | 0.13988712  |
| N                                                                                                            | -2.39056264 | -1.30816904 | -0.15881810 | N                                                                                                                                                                                             | -1.04671891 | -0.74905916 | -0.18983788 |
| N                                                                                                            | -2.60827164 | 0.02175496  | -0.15865310 | C                                                                                                                                                                                             | 0.02287509  | 0.06134484  | -0.40357088 |
| C                                                                                                            | -1.43632564 | 0.69746796  | -0.15860110 | C                                                                                                                                                                                             | 1.13001609  | -0.74311716 | -0.19071688 |
| C                                                                                                            | -0.45649364 | -0.28595704 | -0.15876910 | C                                                                                                                                                                                             | 3.52150409  | -1.45381416 | -0.25392088 |
| C                                                                                                            | 1.81899236  | -1.31375504 | -0.15860610 | C                                                                                                                                                                                             | 4.88272209  | -1.15652416 | -0.33868688 |
| C                                                                                                            | 3.21039836  | -1.20275404 | -0.15856010 | C                                                                                                                                                                                             | 5.31123009  | 0.17008184  | -0.45263988 |
| C                                                                                                            | 3.82000236  | 0.05623996  | -0.15863610 | C                                                                                                                                                                                             | 4.36454909  | 1.19954584  | -0.47815588 |
| C                                                                                                            | 3.02297936  | 1.20575496  | -0.15876510 | C                                                                                                                                                                                             | 3.00297609  | 0.90580284  | -0.38928488 |
| C                                                                                                            | 1.63140536  | 1.09760396  | -0.15881610 | H                                                                                                                                                                                             | -0.08462191 | 1.08806184  | -0.71274288 |
| H                                                                                                            | -4.64951564 | -0.29893104 | -0.15862910 | H                                                                                                                                                                                             | 3.19238709  | -2.48399516 | -0.17013588 |
| H                                                                                                            | -4.13324664 | 1.15636896  | 0.73474290  | H                                                                                                                                                                                             | 5.60956709  | -1.96341916 | -0.31846088 |
| H                                                                                                            | -4.13329864 | 1.15653996  | -1.05173810 | H                                                                                                                                                                                             | 6.37053209  | 0.39960584  | -0.51944888 |
| H                                                                                                            | -1.39692864 | 1.77524196  | -0.15860810 | H                                                                                                                                                                                             | 4.68557709  | 2.23375984  | -0.56156888 |
| H                                                                                                            | 1.35020436  | -2.29181204 | -0.15854410 | H                                                                                                                                                                                             | 2.28285109  | 1.71871284  | -0.39681888 |
| H                                                                                                            | 3.81941636  | -2.10222104 | -0.15846110 | C                                                                                                                                                                                             | -2.88021191 | 0.83840284  | 0.10620212  |
| H                                                                                                            | 4.90264436  | 0.14102096  | -0.15859210 | C                                                                                                                                                                                             | -4.24063591 | 1.14066484  | 0.01658412  |
| H                                                                                                            | 3.48409336  | 2.18916296  | -0.15883510 | C                                                                                                                                                                                             | -5.15106091 | 0.17602784  | -0.42500288 |

|   |            |            |             |   |             |             |             |
|---|------------|------------|-------------|---|-------------|-------------|-------------|
| H | 1.02977636 | 2.00172896 | -0.15893210 | C | -4.69549291 | -1.09657416 | -0.78458988 |
|   |            |            |             | C | -3.33652891 | -1.40754416 | -0.71493388 |
|   |            |            |             | C | -2.43687491 | -0.43431516 | -0.26780888 |
|   |            |            |             | H | -2.17895491 | 1.57792084  | 0.47799312  |
|   |            |            |             | H | -4.58704191 | 2.12784884  | 0.30594812  |
|   |            |            |             | H | -6.20843291 | 0.41359484  | -0.48688588 |
|   |            |            |             | H | -5.39667791 | -1.84941016 | -1.13092388 |
|   |            |            |             | H | -2.97164591 | -2.38553516 | -1.00593088 |

## 8. References

1. Y. Shi, X. Yu and C. Y. Li, *Eur. J. Org. Chem.*, 2015, **2015**, 6429.
2. M. Felici, P. Contreras-Carballada, J. M. M. Smits, R. J. M. Nolte, R. M. Williams, L. De Cola and M. C. Feiters, *Molecules*, 2010, **15**, 2039.
3. O. V. Dolomanov, L. J. Bourhis, R. J. Gildea, J. A. K. Howard and H. Puschmann, *J. Appl. Cryst.*, 2009, **42**, 339.
4. L. J. Bourhis, O. V. Dolomanov, R. J. Gildea, J. A. K. Howard and H. Puschmann, *Acta Cryst.*, 2015, **A71**, 59.
5. G. M. Sheldrick, *Acta Cryst.*, 2015, **C71**, 3.
6. Gaussian 09, Revision D.01, M. J. Frisch, G. W. Trucks, H. B. Schlegel, G. E. Scuseria, M. A. Robb, J. R. Cheeseman, G. Scalmani, V. Barone, B. Mennucci, G. A. Petersson, H. Nakatsuji, M. Caricato, X. Li, H. P. Hratchian, A. F. Izmaylov, J. Bloino, G. Zheng, J. L. Sonnenberg, M. Hada, M. Ehara, K. Toyota, R. Fukuda, J. Hasegawa, M. Ishida, T. Nakajima, Y. Honda, O. Kitao, H. Nakai, T. Vreven, J. A. Montgomery, Jr., J. E. Peralta, F. Ogliaro, M. Bearpark, J. J. Heyd, E. Brothers, K. N. Kudin, V. N. Staroverov, T. Keith, R. Kobayashi, J. Normand, K. Raghavachari, A. Rendell, J. C. Burant, S. S. Iyengar, J. Tomasi, M. Cossi, N. Rega, J. M. Millam, M. Klene, J. E. Knox, J. B. Cross, V. Bakken, C. Adamo, J. Jaramillo, R. Gomperts, R. E. Stratmann, O. Yazyev, A. J. Austin, R. Cammi, C. Pomelli, J. W. Ochterski, R. L. Martin, K. Morokuma, V. G. Zakrzewski, G. A. Voth, P. Salvador, J. J. Dannenberg, S. Dapprich, A. D. Daniels, O. Farkas, J. B. Foresman, J. V. Ortiz, J. Cioslowski and D. J. Fox, Gaussian, Inc., Wallingford CT, 2013.
